# Supplementary material
Source: PubMed Central journal article supplement (PMC8207243)
Supplement: jama-e217939-s001.pdf [file jama-e217939-s001.pdf]

## Supplemental Online Content

VanderPluym JH, Halker Singh RB, Urtecho M, et al. Acute treatments for episodic migraine in adults: a systematic review and meta-analysis. *JAMA*. doi:10.1001/jama.2021.7939

eTable 1. Search strategy

eTable 2. List of the excluded interventions

eTable 3. Definition of pain and function outcomes

eTable 4. Pain and function scales included in the analysis

eTable 5. Categories of adverse events

eTable 6. Definition and approaches to grade strength of evidence

eTable 7. Results of systematic reviews evaluating triptans and nonsteroidal anti-inflammatory drugs (NSAIDs)

eTable 8. Characteristics of included studies evaluating CGRP, 5-HT<sub>1F</sub>, antiemetics, ergot alkaloids, opioids, other pharmacological interventions, and nonpharmacological interventions

eTable 9. Adverse events

eTable 10. Subgroup analysis

eTable 11. Risk of bias (Cochrane Risk of Bias tool for randomized trials [RoB 2.0]) for randomized clinical trials

eTable 12. Effectiveness of treatments other than triptans and nonsteroidal anti-inflammatory drugs

eFigure 1. Findings of Meta-analysis of 5-HT<sub>1F</sub> Receptor Agonists on Pain and Function Outcomes measured as Continuous Outcomes for Episodic Migraine in Adults

eFigure 2. Findings of Meta-analysis of Antiemetics on Pain Outcomes measured as Continuous Outcomes for Episodic Migraine in Adults

eFigure 3. Findings of Meta-analysis of Ergot Alkaloids on Pain and Function Outcomes measured as Binary Outcomes for Episodic Migraine in Adults

eFigure 4. Findings of Meta-analysis of Ergot Alkaloids on Pain Outcomes measured as Continuous Outcomes for Episodic Migraine in Adults

eFigure 5. Findings of Meta-analysis of Opioids on Pain and Function Outcomes measured as Binary Outcomes for Episodic Migraine in Adults

eFigure 6. Findings of Meta-analysis of Opioids on Pain Outcomes measured as Continuous Outcomes for Episodic Migraine in Adults

eFigure 7. Findings of Meta-analysis of Other Pharmacological Interventions on Pain and Function Outcomes measured as Binary Outcomes for Episodic Migraine in Adults

eFigure 8. Findings of Meta-analysis of Other Pharmacological Interventions on Pain and Function Outcomes measured as Continuous Outcomes for Episodic Migraine in Adults

eFigure 9. Findings of Meta-analysis of Nonpharmacological Interventions on Pain Outcomes measured as Binary Outcomes for Episodic Migraine in Adults

eFigure 10. Findings of Meta-analysis of Nonpharmacological Interventions on Pain Outcomes measured as Continuous Outcomes for Episodic Migraine in Adults

References

This supplemental material has been provided by the authors to give readers additional information about their work.

## eTable 1. Search strategy

Ovid

Database(s): APA PsycInfo 1806 to February Week 3 2021, EBM Reviews - Cochrane Central Register of Controlled Trials January 2021, EBM Reviews - Cochrane Database of Systematic Reviews 2005 to February 19, 2021, Embase 1974 to 2021 February 24, Ovid MEDLINE(R) and Epub Ahead of Print, In-Process, In-Data-Review & Other Non-Indexed Citations and Daily 1946 to February 24, 2021

Search Strategy:

| #  | Searches                                                                                                                                                                                                                                                                                                                                                                                                                                                                                                                                                                                                                                                                                                                                                                                                                                                                                                                           |
|----|------------------------------------------------------------------------------------------------------------------------------------------------------------------------------------------------------------------------------------------------------------------------------------------------------------------------------------------------------------------------------------------------------------------------------------------------------------------------------------------------------------------------------------------------------------------------------------------------------------------------------------------------------------------------------------------------------------------------------------------------------------------------------------------------------------------------------------------------------------------------------------------------------------------------------------|
| 1  | exp Migraine Disorders/dt, th [Drug Therapy, Therapy]                                                                                                                                                                                                                                                                                                                                                                                                                                                                                                                                                                                                                                                                                                                                                                                                                                                                              |
| 2  | migraine*.ti,ab,hw,kw.                                                                                                                                                                                                                                                                                                                                                                                                                                                                                                                                                                                                                                                                                                                                                                                                                                                                                                             |
| 3  | exp narcotic analgesic agent/                                                                                                                                                                                                                                                                                                                                                                                                                                                                                                                                                                                                                                                                                                                                                                                                                                                                                                      |
| 4  | exp Analgesics, Opioid/<br>(acetorphine or acetylcodeine or acetylmethadol or Alfentanil or Alphaprodine or anileridine or apadoline or azidomorphine or benzhydrocodone or bezitramide or bremazocine or "Brompton mixture" or Buprenorphine or Butorphanol or ciramadol or cocodamol or Codeine or codydramol or conorfone or cyclazocine or Dextromoramide or Dextropropoxyphene or dextrophan or dezocine or diamorphine or diconal or dihydrocodeine or dihydroetorphine or Dihydromorphine or dimethylthiambutene or Diphenoxylate or dipipanone or enadoline or eptazocine or ethylketazocine or Ethylketocyclazocine or Ethylmorphine or etonitazene or Etorphine or etoxeridine or faxeladol or Fentanyl or furethidine or gelonida or Heroin or Hydrocodone or isalmadol or isomethadone or ketazocine or ketobemidone or ketogan or kyotorphin or lefetamine or                                                         |
| 5  | levacetylmethadol or levomethadone or Levorphanol or Meperidine or Meptazinol or metazocine or Methadone or "Methadyl Acetate" or methylsamidorphan or Morphine or "morphinomimetic agent*" or "morphinomimetic drug*" or morphinone or Nalbuphine or narcotic* or nicocodine or nicomorphine or noracymethadol or norbuprenorphine or nordextropropoxyphene or normorphine or norpethidine or norpropoxyphene or "o nortramadol" or oliceridine or opiate or Opiate* or opioid* or Opium or oripavine or Oxycodone or Oxymorphone or pentamorphone or Pentazocine or pethidine or phenadoxone or phenaridine or Phenazocine or phencyclidine or Phenoperidine or picenadol or piminodine or Pirinitramide or piritramide or profadol or Promedol or propiram or sameridine or samidorphan or semorphone or Sufentanil or tapentadol or thebaine or tifluadom or Tilidine or tonazocine or Tramadol or trimeperidine).ti,ab,hw,kw. |
| 6  | exp Anti-Inflammatory Agents, Non-Steroidal/                                                                                                                                                                                                                                                                                                                                                                                                                                                                                                                                                                                                                                                                                                                                                                                                                                                                                       |
| 7  | exp cyclooxygenase inhibitors/                                                                                                                                                                                                                                                                                                                                                                                                                                                                                                                                                                                                                                                                                                                                                                                                                                                                                                     |
| 8  | exp cyclooxygenase 2 inhibitors/                                                                                                                                                                                                                                                                                                                                                                                                                                                                                                                                                                                                                                                                                                                                                                                                                                                                                                   |
| 9  | Aspirin/                                                                                                                                                                                                                                                                                                                                                                                                                                                                                                                                                                                                                                                                                                                                                                                                                                                                                                                           |
| 10 | sulindac/<br>(Aceclofenac or Acemetacin or "Acetylsalicylic acid" or Alclofenac or Aminopyrine or Amodiaquine or Amoxiprin or Ampyrone or Antipyrine or Apazone or Aspirin or                                                                                                                                                                                                                                                                                                                                                                                                                                                                                                                                                                                                                                                                                                                                                      |
| 11 | Azapropazone or Benorilate or Benorylate or Bromelains or Bromfenac or "BW-755C" or Celecoxib or "Choline magnesium salicylate" or "Choline magnesium trisalicylate" or clinoril or Clofazimine or Clofezone or Clonixin or "COX-1 inhibitor*" or "COX-2                                                                                                                                                                                                                                                                                                                                                                                                                                                                                                                                                                                                                                                                           |

- inhibitor\*" or "COX-2 selective inhibitor\*" or Coxib\* or Curcumin or "Cyclooxygenase 1 inhibitor\*" or "Cyclooxygenase 2 inhibitor\*" or "Cyclooxygenase inhibitor\*" or "Cyclooxygenase inhibitor\*" or Dapsone or Dexibuprofen or Dexketoprofen or Diclofenac or Diflunisal or Dipyrrone or Droxicam or Epirizole or Ethenzamide or Etodolac or Etoricoxib or Faislamine or Fenbufen or Fenoprofen or "Flufenamic acid" or Flunoxaprofen or Flurbiprofen or "Glycyrrhizic Acid" or Ibuprofen or Ibuproxam or Indomethacin or Indoprofen or Kebuzone or Ketoprofen or Ketorolac or Licofelone or Lornoxicam or Loxoprofen or Lumiracoxib or "Magnesium salicylate" or "Meclofenamic Acid" or "Mefenamic Acid" or Meloxicam or Mesalamine or Metamizole or "Methyl salicylate" or Mofebutazone or Nabumetone or Naproxen or "Niflumic Acid" or "Nonsteroidal antiinflammator\*" or "Nonsteroidal anti-inflammator\*" or "Non-steroidal antiinflammator\*" or "Non-steroidal anti-inflammator\*" or "Nordihydroguaiaretic Acid" or NSAID\* or osenal or Oxametacin or Oxaprozin or Oxyphenbutazone or Parecoxib or "Pentosan Sulfuric Polyester" or Phenazone or Phenylbutazone or Piroxicam or Pirprofen or Prenazone or Proglumetacin or Rofecoxib or Salicylamide or Salicylate or Sulfasalazine or Sulfinpyrazone or Sulindac or Suprofen or Tenoxicam or "Tiaprofenic acid" or "Tolfenamic acid" or Tolmetin or Valdecocix).ti,ab,hw,kw.
- 12 exp Tryptamines/  
 13 exp triptan derivative/  
 ("5-ht" or "5-hydroxytryptamine\*" or "5-methoxytryptamine\*" or dimethyltryptamine\* or enteramine\* or hippophaine\* or hydroxytryptamine\* or indolyethylamine\* or meksamine\*  
 14 or methoxydimethyltryptamine\* or methoxytryptamine\* or methylbufotenin or mexamine\* or Serotonin or triptan\* or tryptamine\*).ti,ab,hw,kw.
- 15 exp Ergot Alkaloids/  
 (Bromocriptine\* or Cabergoline\* or "clavine alkaloid\*" or "clavines alkaloid\*" or Dihydroergocornine\* or Dihydroergocristine\* or Dihydroergocryptine\* or Dihydroergotamine\* or Dihydroergotoxine\* or Ergoline\* or "Ergoloid Mesylate\*" or  
 16 Ergonovine\* or "ergot agent\*" or "ergot alkaloid\*" or "ergot drug\*" or "ergot medication\*" or Ergotamine\* or Ergotamines or "ergotoxine alkaloid\*" or "ergots alkaloid\*" or Lisuride\* or "Lysergic Acid" or "Lysergic Acid Diethylamide\*" or Metergoline\* or Methylergonovine\* or Methysergide\* or Nicergoline\* or Pergolide\*).ti,ab,hw,kw.
- 17 exp Analgesics/  
 (Acetaminophen or Adenosine or Amantadine or Amitriptyline or analgesic\* or analgetic\* or anbesol or anodyne\* or anpirtoline or antalgic\* or antinociceptive\* or antrafenine or auralgan or axomadol or befiradol or bificfadine or brivaracetam or brivolidige or bromadoline or "Calcitonin Gene-Related Peptide Receptor Antagonist\*" or cannabidivarin or capsaicin or Carbachol or Carbamazepine or cebranopadol or cibinetide or cizolirtine or Clonidine or crobenetine or Cyclazocine or dapansutrule or dasolampanel or davasaicin or  
 18 deacetylappaconitine or "Dentin Desensitizing" or "desensitizing agent\*" or "desensitizing drug\*" or "desensitizing medication\*" or Dexmedetomidine or difelikefalin or Dihydroergotamine or dimiracetam or dizatrifone or doxpicomine or drinidene or Dronabino or Duloxetine or ecopladib or edronocaine or efipladib or elismetrep or "embelate potassium" or enkephalin or epibatidine or equagesic or Ergotamine or ethoheptazine or fadolmidine or fasinumab or "floctafenic acid" or floctafenine or flunixin or "flunixin meglumine" or flupirtine or Flurbiprofen or frakefamide or fulranumab or

funapide or Gabapentin or gefapixant or giripladib or "glafenic acid" or Glafenine or "gw 493838" or "gw 842166" or hasamal or ibudilast or Ibuprofen or indantadol or Interleukin or Ketamine or lacosamide or lappaconitine or lenabasum or letimide or lexanopadol or "Magnesium Sulfate" or mavatrep or Medetomidine or Methotrimeprazine or Milnacipran or Mitoxantrone or Nefopam or neurotropin or "Nitrous Oxide" or nuvanil or olodanrigan or olorinab or olvanil or "omega conotoxin" or panidex or "pf 3557156" or "pf 4136309" or "pf 4480682" or "pf 592379" or "pf 738502" or Phenacetin or Pizotyline or pravadoline or Pregabalin or Quinine or ralfinamide or retigabine or ruzadolane or sampirtine or senrebotase or shogaol or strascogestic or tanezumab or tazadolene or tebanicline or tetrodotoxin or tivanisiran or traxoprodil or vedaclidine or vixotrigine or Xylazine).ti,ab,hw,kw.

19 exp Muscle Relaxants, Central/

20 exp muscle relaxant agent/

(afloqualone or alcuronium or "atracurium besilate" or azumolene or baclofen or Baclofent or botulinum or branaplam or Carisoprodol or "chandonium iodide" or Chlormezanone or Chlorphenesin or chlorproethazine or Chlorzoxazone or cisatracurium or curare or curaremimetic\* or curariform or curarizing or Dantrolene or decamethonium or "depolarizing neuromuscular" or deutolperisone or diadonium or Diazepam or "dihydro beta erythroidine" or dimethyltubocurarine or doxacurium or duador or eperisone or fazadinium or febarbamate or flumetramide or gallamine or gantacurium or "hexafluronium bromide" or idrocilamide or inaperisone or lanperisone or "mebezonium iodide" or Medazepam or Mephenesin or Meprobamate or metaxalone or Methocarbamol or mivacurium or "Muscle relaxant\*" or "muscle relaxing" or "musculotropic relaxant\*" or "musculotropic relaxing" or myorelaxant or myotonolytic\* or nefopam or nelezaprine or "neuromuscular agent\*" or "neuromuscular blocker\*" or "neuromuscular blocking" or 21 "neuromuscular depolarizing agent\*" or "neuromuscular depolarizing drug\*" or "neuromuscular depolarizing medication\*" or "neuromuscular drug\*" or "neuromuscular medication\*" or "neuromuscular nondepolarizing agent\*" or "neuromuscular nondepolarizing drug\*" or "neuromuscular nondepolarizing medication\*" or "neuromuscular synapse blocking agent\*" or "neuromuscular synapse blocking drug\*" or "neuromuscular synapse blocking medication\*" or "nondepolarizing neuromuscular blocking agent\*" or "nondepolarizing neuromuscular blocking drug\*" or "nondepolarizing neuromuscular blocking medication\*" or norgesic or Orphenadrine or pancuronium or phenprobamate or pipecuronium or promoxolane or pyrocurine or Quinine or "rapacurium bromide" or rocuronium or silperisone or styramate or suxamethonium or "tiemonium methylsulfate" or tizanidine or Tolperisone or toxiferine or "tubocurarine chloride" or vecuronium or vesamicol or Xylazine or Zoxazolamine).ti,ab,hw,kw.

22 exp Antiemetics/

23 exp Nausea/dt [Drug Therapy]

24 exp Vomiting/dt [Drug Therapy]

((drug\* or agent\* or medication\*) adj3 (nausea or vomit\*)) or alizapride or "anti emetic\*" or antiemetic\* or antimetic\* or "anti-metic\*" or antinausea\* or "anti-nausea\*" or

25 antivomit\* or "anti-vomit\*" or Aprepitant or azasetron or batanopride or belidral or bendedtin or benzquinamide or bromopride or buclizine or casopitant or chlorcyclizine or chlorphenethazine or Chlorpromazine or cinnarizine or cisapride or clebopride or Cyclizine

- or dazopride or debendox or Dexamethasone or Diazepam or difenidol or Dimenhydrinate or Diphenhydramine or dixyrazine or "dolasetron mesilate" or Domperidone or Doxylamine or dronabinol or Droperidol or exepanol or ezlopitant or fabesetron or fosaprepitant or fosnetupitant or Granisetron or Haloperidol or hydrodolasetron or icospiramide or indisetron or lerisetron or lintopride or Lorazepam or lurosetron or maropitant or Meclizine or meclozine or Methylprednisolone or Metoclopramide or metopimazine or nabilone or netupitant or norchlorpromazine or Olanzapine or Ondansetron or Palonosetron or pancopride or Prochlorperazine or Promazine or promethazine or ramosetron or renzapride or ricasetron or rolapitant or Scopolamine or sulpiride or telmapitant or tetrahydrocannabinol or Thiethylperazine or transmer or Trifluoperazine or Triflupromazine or trimethobenzamide or Tropisetron or vestipitant or vofopitant or zacopride).ti,ab,hw,kw.
- 26 exp Cannabis/  
 27 exp cannabinoid/  
 28 exp "cannabis use"/  
 29 exp Marijuana Smoking/  
 30 exp Cannabinoids/  
 31 exp Cannabidiol/  
 ("1 butyl 3 1 naphthoyl indole" or "11 hydroxydronabinol" or "2 arachidonoylglycerol" or "2 methyl 3 1 naphthoyl 1 propylindole" or "3 1 naphthoyl 1 pentyindole" or "3 2 iodo 5 nitrobenzoyl 1 1 methyl 2 piperidinylmethyl indole" or "3 hydroxy delta9 tetrahydrocannabinol" or "ajulemic acid" or anandamide or bhang or bhangs or cannabi or cannabichromene or cannabidiol or cannabielsoin or cannabigerol or cannabinoid or cannabinol or cannabis or cannador or charas or Cindica or deacetyllevonantradol or dexanabinol or dextronantradol or dronabinol or endocannabinoid or ganja or ganjas or hashish or hashishs or hemp or hemsps or levonantradol or marihuana\* or marijuana\* or methanandamide or "n oleoylethanolamine" or nabilone or nabiximols or nantradol or "noladin ether" or palmidrol or tetrahydrocannabinol or "tetrahydrocannabinolic acid" or virodhamine).mp.
- 32  
 33 exp Biofeedback, Psychology/  
 ("alpha feedback\*" or biofeedback\* or "bogus physiological feedback\*" or "brainwave feedback\*" or "eeg feedback\*" or "electroencephalography feedback\*" or  
 34 "electromyography feedback\*" or "false physiological feedback\*" or myofeedback\* or neurofeedback\* or "psychophysiologic feedback\*").ti,ab,hw,kw.
- 35 Electric Stimulation Therapy/  
 36 exp neuromodulation/  
 (((Electric\* or electro or galvano or Transcutaneous\*) adj3 (stimulat\* or stimulus)) or  
 37 electrostimulation\* or electrostimulus or electrotherap\* or "E-stim" or ESTIM or FES or galvanostimulation\* or galvanostimulus or Neuromodulation or neuromodulatory).ti,ab,hw,kw.
- 38 exp Cognitive Therapy/  
 39 exp Cognitive Behavior Therapy/  
 40 (CBT or "Cognitive behavioral therap\*" or "Cognitive therap\*").ti,ab,hw,kw.  
 41 exp Acupuncture/

- 42 exp Acupuncture Therapy/
- 43 (acupressure or acupuncture or "auricular needl\*" or auriculotherapy or "ear needl\*" or electroacupuncture or moxibustion or Shiatsu or "Tui Na").ti,ab,hw,kw.
- 44 exp exercise/
- 45 exp exercise therapy/
- 46 (aerobics or anaerobics or bicycling or biking or "endurance training" or exercis\* or "fitness training" or isometrics or "physical exertion" or "physical activit\*" or "resistance training" or running or "strength training" or swimming or walking or weightlifting).ti,ab,hw,kw.
- 47 (drug\* or pharmacotherap\* or medication\* or agent\* or chemotherap\* or intervention\* or manag\* or therap\* or treat\*).ti,ab,hw,kw.
- 48 or/3-47
- 49 2 and 48
- 50 1 or 49
- 51 exp evidence based medicine/
- 52 exp meta analysis/
- 53 exp Meta-Analysis as Topic/
- 54 exp "systematic review"/
- 55 exp Guideline/ or exp Practice Guideline/
- 56 exp controlled study/
- 57 exp Randomized Controlled Trial/
- 58 exp triple blind procedure/
- 59 exp Double-Blind Method/
- 60 exp Single-Blind Method/
- 61 exp latin square design/
- 62 exp Placebos/
- 63 exp Placebo Effect/
- 64 exp comparative study/
- 65 exp intervention studies/
- 66 exp Cross-Sectional Studies/
- 67 exp Cross-Over Studies/
- 68 exp Cohort Studies/
- 69 exp longitudinal study/
- 70 exp retrospective study/
- 71 exp prospective study/
- 72 exp clinical trial/
- 73 clinical study/
- 74 exp case-control studies/
- 75 exp confidence interval/
- 76 exp multivariate analysis/

((evidence adj based) or (meta adj analys\*) or (systematic\* adj3 review\*) or guideline\* or (control\* adj3 study) or (control\* adj3 trial) or (randomized adj3 study) or (randomized adj3 trial) or (randomised adj3 study) or (randomised adj3 trial) or "pragmatic clinical trial" or (doubl\* adj blind\*) or (doubl\* adj mask\*) or (singl\* adj blind\*) or (singl\* adj mask\*) or (tripl\* adj blind\*) or (tripl\* adj mask\*) or (trebl\* adj blind\*) or (trebl\* adj mask\*) or "latin square" or placebo\* or nocebo\* or multivariate or "comparative study" or "comparative survey" or "comparative analysis" or (intervention\* adj2 study) or (intervention\* adj2 trial) or "cross-sectional study" or "cross-sectional analysis" or "cross-sectional survey" or "cross-sectional design" or "prevalence study" or "prevalence analysis" or "prevalence survey" or "disease frequency study" or "disease frequency analysis" or "disease frequency survey" or crossover or "cross-over" or cohort\* or "longitudinal study" or "longitudinal survey" or "longitudinal analysis" or "longitudinal evaluation" or longitudinal\* or ((retrospective or "ex post facto") adj3 (study or survey or analysis or design)) or retrospectiv\* or "prospective study" or "prospective survey" or "prospective analysis" or prospectiv\* or "concurrent study" or "concurrent survey" or "concurrent analysis" or "clinical study" or "clinical trial" or "case control study" or "case base study" or "case referent study" or "case referent study" or "case referent study" or "case compeer study" or "case comparison study" or "matched case control" or "multicenter study" or "multi-center study" or "odds ratio" or "confidence interval" or "change analysis" or ((study or trial or random\* or control\*) and compar\*)).mp,pt.

77  
78 or/51-77

79 50 and 78

limit 79 to ("all adult (19 plus years)" or "young adult (19 to 24 years)" or "adult (19 to 44 years)" or "young adult and adult (19-24 and 19-44)" or "middle age (45 to 64 years)" or "middle aged (45 plus years)" or "all aged (65 and over)" or "aged (80 and over)") [Limit not valid in APA PsycInfo,CCTR,CDSR,Embase; records were retained]

80  
limit 80 to (adult <18 to 64 years> or aged <65+ years>) [Limit not valid in APA  
81 PsycInfo,CCTR,CDSR,Ovid MEDLINE(R),Ovid MEDLINE(R) Daily Update,Ovid MEDLINE(R) In-Process,Ovid MEDLINE(R) Publisher; records were retained]

limit 79 to ("all infant (birth to 23 months)" or "all child (0 to 18 years)" or "newborn infant (birth to 1 month)" or "infant (1 to 23 months)" or "preschool child (2 to 5 years)" or "child (6 to 12 years)" or "adolescent (13 to 18 years)") [Limit not valid in APA  
82 PsycInfo,CCTR,CDSR,Embase; records were retained]

limit 82 to (embryo or infant or child or preschool child <1 to 6 years> or school child <7 to 12 years> or adolescent <13 to 17 years>) [Limit not valid in APA  
83 PsycInfo,CCTR,CDSR,Ovid MEDLINE(R),Ovid MEDLINE(R) Daily Update,Ovid MEDLINE(R) In-Process,Ovid MEDLINE(R) Publisher; records were retained]

84 83 not 81

85 79 not 84

86 migraine\*.ti.

87 85 and 86

limit 87 to (dissertation abstract or editorial or erratum or note or addresses or  
88 autobiography or bibliography or biography or blogs or comment or dictionary or directory or interactive tutorial or interview or lectures or legal cases or legislation or news or



newspaper article or overall or patient education handout or periodical index or portraits or published erratum or video-audio media or webcasts) [Limit not valid in APA PsycInfo,CCTR,CDSR,Embase,Ovid MEDLINE(R),Ovid MEDLINE(R) Daily Update,Ovid MEDLINE(R) In-Process,Ovid MEDLINE(R) Publisher; records were retained]

- 89 from 88 keep 195-218
- 90 (87 not 88) or 89
- 91 limit 90 to yr="2018 -Current"
- 92 remove duplicates from 91
- 93 limit 90 to yr="2015-2017"
- 94 remove duplicates from 93
- 95 limit 90 to yr="2010-2014"
- 96 remove duplicates from 95
- 97 limit 90 to yr="2002-2009"
- 98 remove duplicates from 97
- 99 90 not (91 or 93 or 95 or 97)
- 100 remove duplicates from 99
- 101 92 or 94 or 96 or 98 or 100

#### Scopus

- 1 TITLE(migraine\*)
- 2 TITLE-ABS-KEY(acetorphine or acetylcodeine or acetylmethadol or Alfentanil or Alphaprodine or anileridine or apadoline or azidomorphine or benzhydrocodone or bezitramide or bremazocine or "Brompton mixture" or Buprenorphine or Butorphanol or ciramadol or cocodamol or Codeine or codydramol or conorfone or cyclazocine or Dextromoramide or Dextropropoxyphene or dextrorphan or dezocine or diamorphine or diconal or dihydrocodeine or dihydroetorphine or Dihydromorphine or dimethylthiambutene or Diphenoxylate or dipipanone or enadoline or eptazocine or ethylketazocine or Ethylketocyclazocine or Ethylmorphine or etonitazene or Etorphine or etoxeridine or faxeladol or Fentanyl or furethidine or gelonida or Heroin or Hydrocodone or isalmadol or isomethadone or ketazocine or ketobemidone or ketogan or kyotorphin or lefetamine or levacetylmethadol or levomethadone or Levorphanol or Meperidine or Meptazinol or metazocine or Methadone or "Methadyl Acetate" or methylsamidorphan or Morphine or "morphinomimetic agent\*" or "morphinomimetic drug\*" or morphinone or Nalbuphine or narcotic\* or nicocodine or nicomorphine or noracymethadol or norbuprenorphine or nordextropropoxyphene or normorphine or norpethidine or norpropoxyphene or "o nortramadol" or oliceridine or opiate or Opiate\* or opioid\* or Opium or oripavine or Oxycodone or Oxymorphone or pentamorphone or Pentazocine or pethidine or phenadoxone or phenaridine or Phenazocine or phencyclidine or Phenoperidine or picenadol or piminodine or Pirinitramide or piritramide or profadol or Promedol or propiram or sameridine or samidorphan or semorphone or Sufentanil or tapentadol or thebaine or tifuladom or Tilidine or tonazocine or Tramadol or trimeperidine)

- 3 TITLE-ABS-KEY(Aceclofenac or Acemetacin or "Acetylsalicylic acid" or Alclofenac or Aminopyrine or Amodiaquine or Amoxiprin or Ampyrone or Antipyrine or Apazone or Aspirin or Azapropazone or Benorilate or Benorylate or Bromelains or Bromfenac or "BW-755C" or Celecoxib or "Choline magnesium salicylate" or "Choline magnesium trisalicylate" or clinoril or Clofazimine or Clofezone or Clonixin or "COX-1 inhibitor\*" or "COX-2 inhibitor\*" or "COX-2 selective inhibitor\*" or Coxib\* or Curcumin or "Cyclooxygenase 1 inhibitor\*" or "Cyclooxygenase 2 inhibitor\*" or "Cyclooxygenase inhibitor\*" or "Cyclo-oxygenase inhibitor\*" or Dapsone or Dexibuprofen or Dexketoprofen or Diclofenac or Diflunisal or Dipyrone or Droxicam or Epirizole or Ethenzamide or Etodolac or Etoricoxib or Faislamine or Fenbufen or Fenoprofen or "Flufenamic acid" or Flunoxaprofen or Flurbiprofen or "Glycyrrhizic Acid" or Ibuprofen or Ibuproxam or Indomethacin or Indoprofen or Kebuzone or Ketoprofen or Ketorolac or Licofelone or Lornoxicam or Loxoprofen or Lumiracoxib or "Magnesium salicylate" or "Meclofenamic Acid" or "Mefenamic Acid" or Meloxicam or Mesalamine or Metamizole or "Methyl salicylate" or Mofebutazone or Nabumetone or Naproxen or "Niflumic Acid" or "Nonsteroidal antiinflammator\*" or "Nonsteroidal anti-inflammator\*" or "Non-steroidal antiinflammator\*" or "Non-steroidal anti-inflammator\*" or "Nordihydroguaiaretic Acid" or NSAID\* or osenal or Oxametacin or Oxaprozin or Oxyphenbutazone or Parecoxib or "Pentosan Sulfuric Polyester" or Phenazone or Phenylbutazone or Piroxicam or Pirprofen or Prenazone or Proglumetacin or Rofecoxib or Salicylamide or Salicylate or Sulfasalazine or Sulfinpyrazone or Sulindac or Suprofen or Tenoxicam or "Tiaprofenic acid" or "Tolfenamic acid" or Tolmetin or Valdecocix)
- 4 TITLE-ABS-KEY("5-ht" or "5-hydroxytryptamine\*" or "5-methoxytryptamine\*" or dimethyltryptamine\* or enteramine\* or hippophaine\* or hydroxytryptamine\* or indolyethylamine\* or meksamine\* or methoxydimethyltryptamine\* or methoxytryptamine\* or methylbufotenin or mexamine\* or Serotonin or triptan\* or tryptamine\*)
- 5 TITLE-ABS-KEY(Bromocriptine\* or Cabergoline\* or "clavine alkaloid\*" or "clavines alkaloid\*" or Dihydroergocornine\* or Dihydroergocristine\* or Dihydroergocryptine\* or Dihydroergotamine\* or Dihydroergotoxine\* or Ergoline\* or "Ergoloid Mesylate\*" or Ergonovine\* or "ergot agent\*" or "ergot alkaloid\*" or "ergot drug\*" or "ergot medication\*" or Ergotamine\* or Ergotamines or "ergotoxine alkaloid\*" or "ergots alkaloid\*" or Lisuride\* or "Lysergic Acid" or "Lysergic Acid Diethylamide\*" or Metergoline\* or Methylergonovine\* or Methysergide\* or Nicergoline\* or Pergolide\*)
- 6 TITLE-ABS-KEY(Acetaminophen or Adenosine or Amantadine or Amitriptyline or analgesic\* or analgetic\* or anbesol or anodyne\* or anpirtoline or antalgic\* or antinociceptive\* or antrafenine or auralgan or axomadol or befiradol or bicifadine or brivaracetam or brivolidine or bromadoline or "Calcitonin Gene-Related Peptide Receptor Antagonist\*" or cannabidivarin or capsaicin or Carbachol or Carbamazepine or cebranopadol or cibinetide or cizolirtine or Clonidine or crobenetine or Cyclazocine or dapansutril or dasolampanel or davasaicin or deacetylappaconitine or "Dentin Desensitizing" or "desensitizing agent\*" or "desensitizing drug\*" or "desensitizing medication\*" or Dexmedetomidine or difelikefalin or Dihydroergotamine or dimiracetam or dizatrilone or doxpicomine or drinidene or Dronabino or Duloxetine or ecopladib or edronocaine or efipradib or elismetrep or "embelate potassium" or enkephalin or epibatidine or equagesic or Ergotamine or ethoheptazine or fadolmidine or fasinumab or

"floctafenic acid" or floctafenine or flunixin or "flunixin meglumine" or flupirtine or Flurbiprofen or frakefamide or fulranumab or funapide or Gabapentin or gefapixant or giripladib or "glafenic acid" or Glafenine or "gw 493838" or "gw 842166" or hasamal or ibudilast or Ibuprofen or indantadol or Interleukin or Ketamine or lacosamide or lappaconitine or lenabasum or letimide or lexanopadol or "Magnesium Sulfate" or mavatrep or Medetomidine or Methotrimeprazine or Milnacipran or Mitoxantrone or Nefopam or neurotropin or "Nitrous Oxide" or nuvanil or olodanrigan or olorinab or olvanil or "omega conotoxin" or panidex or "pf 3557156" or "pf 4136309" or "pf 4480682" or "pf 592379" or "pf 738502" or Phenacetin or Pizotyline or pravadoline or Pregabalin or Quinine or ralfinamide or retigabine or ruzadolane or sampirtine or senrebotase or shogaol or strascogestic or tanezumab or tazadolene or tebanicline or tetrodotoxin or tivanisiran or traxoprodil or vedaclidine or vixotrigine or Xylazine)

7 TITLE-ABS-KEY(afloqualone or alcuronium or "atracurium besilate" or azumolene or baclofen or Baclofent or botulinum or branaplam or Carisoprodol or "chandonium iodide" or Chlormezanone or Chlorphenesin or chlorproethazine or Chlorzoxazone or cisatracurium or curare or curaremimetic\* or curariform or curarizing or Dantrolene or decamethonium or "depolarizing neuromuscular" or deutolperisone or diadonium or Diazepam or "dihydro beta erythroidine" or dimethyltubocurarine or doxacurium or duador or eperisone or fazadinium or febarbamate or flumetramide or gallamine or gantacurium or "hexafluronium bromide" or idrocilamide or inaperisone or lanperisone or "mebezonium iodide" or Medazepam or Mephenesin or Meprobamate or metaxalone or Methocarbamol or mivacurium or "Muscle relaxant\*" or "muscle relaxing" or "musculotropic relaxant\*" or "musculotropic relaxing" or myorelaxant or myotonolytic\* or nefopam or nelezaprine or "neuromuscular agent\*" or "neuromuscular blocker\*" or "neuromuscular blocking" or "neuromuscular depolarizing agent\*" or "neuromuscular depolarizing drug\*" or "neuromuscular depolarizing medication\*" or "neuromuscular drug\*" or "neuromuscular medication\*" or "neuromuscular nondepolarizing agent\*" or "neuromuscular nondepolarizing drug\*" or "neuromuscular nondepolarizing medication\*" or "neuromuscular synapse blocking agent\*" or "neuromuscular synapse blocking drug\*" or "neuromuscular synapse blocking medication\*" or "nondepolarizing neuromuscular blocking agent\*" or "nondepolarizing neuromuscular blocking drug\*" or "nondepolarizing neuromuscular blocking medication\*" or norgesic or Orphenadrine or pancuronium or phenprobamate or pipecuronium or promoxolane or pyrocurine or Quinine or "rapacuronium bromide" or rocuronium or silperisone or styramate or suxamethonium or "tiemonium methylsulfate" or tizanidine or Tolperisone or toxiferine or "tubocurarine chloride" or vecuronium or vesamicol or Xylazine or Zoxazolamine)

8 TITLE-ABS-KEY(((drug\* or agent\* or medication\*) W/3 (nausea or vomit\*)) or alizapride or "anti emetic\*" or antiemetic\* or antimetic\* or "anti-metic\*" or antinausea\* or "anti-nausea\*" or antivomit\* or "anti-vomit\*" or Aprepitant or azasetron or batanopride or belidral or bendedtin or benzquinamide or bromopride or buclizine or casopitant or chlorcyclizine or chlorphenethazine or Chlorpromazine or cinnarizine or cisapride or clebopride or Cyclizine or dazopride or debendox or Dexamethasone or Diazepam or difenidol or Dimenhydrinate or Diphenhydramine or dixyrazine or "dolasetron mesilate" or Domperidone or Doxylamine or dronabinol or Droperidol or exepanol or ezlopitant or fabesetron or fosaprepitant or fosnetupitant or Granisetron or Haloperidol or hydrodolasetron or icospiramide or indisetron or lerisetron or lintopride or

- Lorazepam or lurosetron or maropitant or Meclizine or meclizine or Methylprednisolone or Metoclopramide or metopimazine or nabilone or netupitant or norchlorpromazine or Olanzapine or Ondansetron or Palonosetron or pancopride or Prochlorperazine or Promazine or promethazine or ramosetron or renzapride or ricasetron or rolapitant or Scopolamine or sulpiride or telmapitant or tetrahydrocannabinol or Thiethylperazine or transmer or Trifluoperazine or Triflupromazine or trimethobenzamide or Tropisetron or vestipitant or vofopitant or zacopride)
- 9 TITLE-ABS-KEY("1 butyl 3 1 naphthoyl indole" or "11 hydroxydronabinol" or "2 arachidonoylglycerol" or "2 methyl 3 1 naphthoyl 1 propylindole" or "3 1 naphthoyl 1 pentylindole" or "3 2 iodo 5 nitrobenzoyl 1 1 methyl 2 piperidinylmethyl indole" or "3 hydroxy delta9 tetrahydrocannabinol" or "ajulemic acid" or anandamide or bhang or bhanges or cannabi or cannabichromene or cannabidiol or cannabielsoin or cannabigerol or cannabinoid or cannabinol or cannabis or cannador or charas or Cindica or deacetyllevonantradol or dexanabinol or dextronantradol or dronabinol or endocannabinoid or ganja or ganjas or hashish or hashishs or hemp or hemsps or levonantradol or marihuana\* or marijuana\* or methanandamide or "n oleoylethanolamine" or nabilone or nabiximols or nantradol or "noladin ether" or palmidrol or tetrahydrocannabinol or "tetrahydrocannabinolic acid" or virodhamine)
- 10 TITLE-ABS-KEY("alpha feedback\*" or biofeedback\* or "bogus physiological feedback\*" or "brainwave feedback\*" or "eeg feedback\*" or "electroencephalography feedback\*" or "electromyography feedback\*" or "false physiological feedback\*" or myofeedback\* or neurofeedback\* or "psychophysiologic feedback\*")
- 11 TITLE-ABS-KEY(((Electric\* or electro or galvano or Transcutaneous\*) W/3 (stimulat\* or stimulus)) or electrostimulation\* or electrostimulus or electrotherap\* or "E-stim" or ESTIM or FES or galvanostimulation\* or galvanostimulus or Neuromodulation or neuromodulatory)
- 12 TITLE-ABS-KEY(CBT or "Cognitive behavioral therap\*" or "Cognitive therap\*")
- 13 TITLE-ABS-KEY(acupressure or acupuncture or "auricular needl\*" or auriculotherapy or "ear needl\*" or electroacupuncture or moxibustion or Shiatsu or "Tui Na")
- 14 TITLE-ABS-KEY(aerobics or anaerobics or bicycling or biking or "endurance training" or exercis\* or "fitness training" or isometrics or "physical exertion" or "physical activit\*" or "resistance training" or running or "strength training" or swimming or walking or weightlifting)
- 15 TITLE-ABS-KEY(drug\* or pharmacotherap\* or medication\* or agent\* or chemotherap\* or intervention\* or manag\* or therap\* or treat\*)
- 16 TITLE-ABS-KEY((evidence W/1 based) or (meta W/1 analys\*) or (systematic\* W/3 review\*) or guideline\* or (control\* W/3 study) or (control\* W/3 trial) or (randomized W/3 study) or (randomized W/3 trial) or (randomised W/3 study) or (randomised W/3 trial) or "pragmatic clinical trial" or (doubl\* W/1 blind\*) or (doubl\* W/1 mask\*) or (singl\* W/1 blind\*) or (singl\* W/1 mask\*) or (tripl\* W/1 blind\*) or (tripl\* W/1 mask\*) or (trebl\* W/1 blind\*) or (trebl\* W/1 mask\*) or "latin square" or placebo\* or nocebo\* or multivariate or "comparative study" or "comparative survey" or "comparative analysis" or (intervention\* W/2 study) or (intervention\* W/2 trial) or "cross-sectional study" or "cross-sectional analysis" or "cross-sectional survey" or "cross-sectional design" or "prevalence study" or "prevalence analysis" or "prevalence survey" or "disease frequency study" or "disease frequency analysis" or "disease frequency survey" or crossover or

"cross-over" or cohort\* or "longitudinal study" or "longitudinal survey" or "longitudinal analysis" or "longitudinal evaluation" or longitudinal\* or ((retrospective or "ex post facto") W/3 (study or survey or analysis or design)) or retrospectiv\* or "prospective study" or "prospective survey" or "prospective analysis" or prospectiv\* or "concurrent study" or "concurrent survey" or "concurrent analysis" or "clinical study" or "clinical trial" or "case control study" or "case base study" or "case referent study" or "case referent study" or "case referent study" or "case compeer study" or "case comparison study" or "matched case control" or "multicenter study" or "multi-center study" or "odds ratio" or "confidence interval" or "change analysis" or ((study or trial or random\* or control\*) and compar\*))

17 1 and (2 or 3 or 4 or 5 or 6 or 7 or 8 or 9 or 10 or 11 or 12 or 13 or 14 or 15) and 16

18 TITLE-ABS-KEY(newborn\* or neonat\* or infant\* or toddler\* or child\* or adolescent\* or paediatric\* or pediatric\* or girl or girls or boy or boys or teen or teens or teenager\* or preschooler\* or "pre-schooler\*" or preteen or preteens or "pre-teen" or "pre-teens" or youth or youths) AND NOT TITLE-ABS-KEY(adult or adults or "middle age" or "middle aged" OR elderly OR geriatric\* OR "old people" OR "old person\*" OR "older people" OR "older person\*" OR "very old")

19 17 and not 18

20 DOCTYPE(ed) OR DOCTYPE(bk) OR DOCTYPE(er) OR DOCTYPE(no) OR DOCTYPE(sh)

21 19 and not 20

22 INDEX(embase) OR INDEX(medline) OR PMID(0\* OR 1\* OR 2\* OR 3\* OR 4\* OR 5\* OR 6\* OR 7\* OR 8\* OR 9\*)

23 21 and not 22

[Clinicaltrials.gov](http://Clinicaltrials.gov)

Condition or disease: " migraine"

Limited to Adult, Older Adult

**eTable 2. List of the excluded interventions**

**Medications with terminated development or in development:**

Zatose tron  
Telcage pant  
Tonabersat  
BI 44370  
PNU-142633  
Dapitant  
Lanepitant  
Selurampanel  
MK-3207  
NXN-188  
Bemesetron  
Tezampanel

**Not available in US:**

Flunarizine  
Dipyron e  
Civamide  
Flupirtine

**eTable 3. Definition of pain and function outcomes**

| <b>Outcome</b>        | <b>Definition</b>                                                                                                                                                                                                                                                                                            |
|-----------------------|--------------------------------------------------------------------------------------------------------------------------------------------------------------------------------------------------------------------------------------------------------------------------------------------------------------|
| Pain free             | No pain at defined assessment time (e.g. 2 hours)                                                                                                                                                                                                                                                            |
| Pain relief           | Improvement of pain from moderate to severe at baseline to mild or none or pain scale improved at least 50% from baseline at defined assessment time (e.g. 2 hours)                                                                                                                                          |
| Sustained pain free   | No pain at initial assessment (e.g. 2 hours) and remains at followup assessment (e.g. 1 day) with no use of rescue medication or relapse (recurrence) within that time frame                                                                                                                                 |
| Sustained pain relief | Improvement of pain from moderate to severe at baseline to mild or none or pain scale improved at least 50% from baseline at defined assessment time (e.g. 2 hours) and remains improved at followup assessment (e.g. 1 day) with no use of rescue medication or relapse (recurrence) within that time frame |
| Improved function     | Improvement of function from moderate to severe at baseline to mild or none at defined assessment time (e.g. 2 hours)                                                                                                                                                                                        |
| Restored function     | No restriction to perform work or usual activities at a defined assessment time (e.g. 2 hours)                                                                                                                                                                                                               |

**eTable 4. Pain and function scales included in the analysis**

| <b>Domain</b> | <b>Scale</b>                                   | <b>Scale characteristics</b>                                                                                                                                                                                                              |
|---------------|------------------------------------------------|-------------------------------------------------------------------------------------------------------------------------------------------------------------------------------------------------------------------------------------------|
| Function      | <b>Function disability score</b>               | Scoring: 0-3. 3, performance of daily activities is severely impaired; 2, working ability severely reduced; 1, working ability mildly reduced; 0, able to function normally. Higher score represents more disruption of daily activities. |
|               | <b>Clinical disability score</b>               | Scoring: 4-point scale (none, mild, moderate, and severe). Total scores range from 0 to 100. Higher score represents more disability.                                                                                                     |
| Pain          | <b>Visual analog scale (VAS)</b>               | Scoring: 0-100 or 0-10 from no pain to worst imaginable pain. Higher score represents more severe pain.                                                                                                                                   |
|               | <b>Short-Form of McGill pain questionnaire</b> | Scoring: 15 items with 2 categories (sensory and affective). Each item scores 0-3. 3, severe; 2, moderate; 1, mild; 0, none. Higher score represents more severe pain.                                                                    |
|               | <b>Subjective pain level (SPL)</b>             | Scoring: 0-10. Higher scores represent severity.                                                                                                                                                                                          |
|               | <b>Pain intensity scale</b>                    | Scoring: 0-10 or 0-4 from no pain to worst imaginable pain. Higher score represents more severe pain.                                                                                                                                     |
|               | <b>Pain relief scale</b>                       | Scoring: 0-4 or 1-5 from complete relief to no relief. Higher score represents less or no pain relief.                                                                                                                                    |
|               | <b>Headache severity scale</b>                 | Scoring: 0-10 or 0-3 from no pain to worst imaginable pain. Higher score represents more severe headache.                                                                                                                                 |



**eTable 5. Categories of adverse events**

| Type of adverse events             | Example                                                                                                                                         |
|------------------------------------|-------------------------------------------------------------------------------------------------------------------------------------------------|
| Cardiovascular adverse event       | Bradycardia, chest discomfort, palpitation, presyncope, vasodilation                                                                            |
| Dermatological adverse event       | Skin rash, application site pain/discomfort, burning sensation, local irritation                                                                |
| Ear, nose and throat adverse event | Ear and labyrinth disorders, hyperacusia, lump in throat or burning throat, nasal congestion, nasal irritation, oropharyngeal pain, pharyngitis |
| Endocrine adverse event            | Recurrent thyroid cancer                                                                                                                        |
| Gastrointestinal adverse event     | Abdominal discomfort/pain, altered taste, anorexia, abnormal taste constipation, diarrhea, dry mouth, dyspepsia, nausea, vomiting               |
| Genitourinary adverse event        | Urinary tract infection, diuresis, nephrolithiasis                                                                                              |
| Hematologic adverse event          | Blood and lymphatic system disorders, bleeding                                                                                                  |
| Immunologic adverse event          | Allergy Hypersensitivity, infections and infestations, influenza, shingles, anaphylaxis, viral meningitis                                       |
| Musculoskeletal adverse event      | Muscle cramp/spasms/tightness, myalgia                                                                                                          |
| Neurological adverse event         | Akathisia, chills, confusion, disorientation, dizziness, dystonic reaction, fatigue, headache, sedation, seizure, vertigo, tremor               |
| Ophthalmological adverse event     | Blurred vision, eyelid swelling, visual disturbances, optic neuritis, lacrimation                                                               |
| Psychological adverse event        | Anxiety, restlessness, euphoria, mood change, nervousness                                                                                       |
| Respiratory adverse event          | Cough, respiratory tract infection, shortness of breath                                                                                         |
| Sleep-related adverse event        | Sleepiness                                                                                                                                      |
| Other adverse event                | Edema, heat sensation, warmth, flushing, cold hands                                                                                             |
| Total number of adverse events     | Total incidence of adverse events                                                                                                               |

**eTable 6. Definition and approaches to grade strength of evidence**

| Strength of Evidence (SOE) <sup>a</sup> | Definition                                                                                                                                                    |
|-----------------------------------------|---------------------------------------------------------------------------------------------------------------------------------------------------------------|
| High                                    | Confidence that the estimate of effect lies close to the true effect (the body of evidence has few or no deficiencies and is judged to be stable).            |
| Moderate                                | Moderate confidence that the estimate of effect lies close to the true effect (the body of evidence has some deficiencies and is judged to be likely stable)  |
| Low                                     | Limited confidence that the estimate of effect lies close to the true effect (the body of evidence has major or numerous deficiencies and is likely unstable) |
| Insufficient                            | No evidence, unable to estimate an effect, or no confidence in the estimate of effect                                                                         |

<sup>a</sup>The strength of evidence (SOE) was graded for the outcomes of pain free, pain relief, sustained pain free, sustained pain relief, function relief, and restored function, pain scale, and function scale. These outcomes were chosen because they were deemed clinically important from a patient's perspective and highly relevant for decision making. The AHRQ Methods Guide for Effectiveness and Comparative Effectiveness Reviews for assessing SOE was followed.<sup>1</sup>

Randomized clinical trials (RCTs) started as high SOE. Domains that could decrease this initial SOE were the methodological limitations of the studies (i.e., risk of bias); precision (based on the size of the body of evidence, number of events, and confidence intervals); directness of the evidence to the question at hand (focusing on whether the outcomes were important to patients vs surrogates); consistency of results (based on qualitative and statistical approaches to evaluate for heterogeneity); and the likelihood of reporting and publication bias.

SOE ratings were lowered for the risk of bias when the studies in a particular comparison had high or unclear risk of bias; imprecision when the number of events was small (<300) or when confidence intervals included substantial benefits and harms (defined as 0.25 relative risk reduction or increase); inconsistency when the  $I^2$  exceeded an arbitrary cutoff >60 percent; and when reporting and publication bias were suspected.

**eTable 7. Results of systematic reviews evaluating triptans and nonsteroidal anti-inflammatory drugs (NSAIDs)**

**eTable 7.1. Results of systematic reviews evaluating triptans**

| <b>Systematic Review</b>    | <b>Interventions</b>                              | <b>Studies (Patients)</b> | <b>Methodology*</b>                                                                                     | <b>Main Findings</b>                                                                                                                                                                                                                                                                                                                                                                                                                                                                                                                                     |
|-----------------------------|---------------------------------------------------|---------------------------|---------------------------------------------------------------------------------------------------------|----------------------------------------------------------------------------------------------------------------------------------------------------------------------------------------------------------------------------------------------------------------------------------------------------------------------------------------------------------------------------------------------------------------------------------------------------------------------------------------------------------------------------------------------------------|
| Ashcroft, 2004 <sup>2</sup> | Naratriptan (Compared with various interventions) | 10 RCT (4,499)            | Search in 2002<br><br>No clear description of study selection methods, risk of bias or excluded studies | Compared with placebo for pain-free response at 2 and 4 hours, naratriptan 2.5 mg were RRs of 2.52 (1.78–3.57) and 2.58 (1.99–3.35)<br><br>-Naratriptan 2.5 mg was more effective than naratriptan 1 mg and less effective in pain-free response than either rizatriptan 10 mg at 4 hours, RR0.68 (0.55–0.85) or sumatriptan100 mg at 4 hours, RR 0.79 (0.67–0.93)<br><br>- Significantly fewer patients experienced adverse effects with naratriptan 2.5 mg than with rizatriptan 10 mg, RR 0.73 (0.56–0.97) or sumatriptan 100 mg, RR 0.68 (0.55–0.86) |
| Bird, 2014 <sup>3</sup>     | Zolmitriptan                                      | 25 RCTs (20,162)          | Search in 2014<br>- Fulfills all AMSTAR criteria                                                        | -For all efficacy outcomes, zolmitriptan surpassed placebo. For oral zolmitriptan 2.5 mg, NNTs were 5.0, 3.2, 7.7, and 4.1 for pain free at two hours, headache relief at two hours, sustained pain-free during the 1 day post dose, and sustained headache                                                                                                                                                                                                                                                                                              |

| Systematic Review                                                                                                                      | Interventions                                            | Studies (Patients)    | Methodology*                                                                                                                                                                  | Main Findings                                                                                                                                                                                                                                                                                                                                                                                                                                                                                                                                                                                                                                                  |
|----------------------------------------------------------------------------------------------------------------------------------------|----------------------------------------------------------|-----------------------|-------------------------------------------------------------------------------------------------------------------------------------------------------------------------------|----------------------------------------------------------------------------------------------------------------------------------------------------------------------------------------------------------------------------------------------------------------------------------------------------------------------------------------------------------------------------------------------------------------------------------------------------------------------------------------------------------------------------------------------------------------------------------------------------------------------------------------------------------------|
|                                                                                                                                        |                                                          |                       |                                                                                                                                                                               | <p>relief during the 1 day post dose, respectively</p> <p>-Adverse events were transient and mild and were more common with zolmitriptan than placebo</p>                                                                                                                                                                                                                                                                                                                                                                                                                                                                                                      |
| <p>Chen, 2007<sup>4</sup> (study level meta-analysis)<br/>Two pooled analyses (Caddy 2002<sup>5</sup> and Dahlof 2006<sup>6</sup>)</p> | <p>Almotriptan (compared with various interventions)</p> | <p>8 RCTs (4,995)</p> | <p>Search in 2007<br/>-Review authors with industry ties.<br/>Duplication of review procedures is not clearly described, no list or clear description of excluded studies</p> | <p>-Almotriptan 12.5 mg was significantly more effective than placebo for all efficacy outcomes (absolute rate differences ranged from 0.01 to 0.28)</p> <p>- No significant differences in efficacy outcomes comparing almotriptan 12.5 mg against sumatriptan 100 mg and zolmitriptan 2.5 mg, but almotriptan 12.5 mg was associated with significantly fewer adverse events than sumatriptan 100 mg</p> <p>-Almotriptan 12.5 mg was significantly less effective than almotriptan 25 mg for 1-hour pain-free response but with fewer patients experiencing adverse events</p> <p>-Conclusions from pooled analyses were similar to study level analyses</p> |

| <b>Systematic Review</b>    | <b>Interventions</b>                                                                                      | <b>Studies (Patients)</b> | <b>Methodology*</b>                                                                                                             | <b>Main Findings</b>                                                                                                                                                                                                                                                                                                                                                                                                          |
|-----------------------------|-----------------------------------------------------------------------------------------------------------|---------------------------|---------------------------------------------------------------------------------------------------------------------------------|-------------------------------------------------------------------------------------------------------------------------------------------------------------------------------------------------------------------------------------------------------------------------------------------------------------------------------------------------------------------------------------------------------------------------------|
| Derry, 2012 <sup>7</sup>    | Oral sumatriptan (alone or in combination with an antiemetic compared with various interventions)         | 61 RCTs (37,250)          | Search in 2011 but re-evaluation suggested stability of findings.<br>- Fulfills all AMSTAR criteria                             | -NNTs 6.1, 7.5, and 4.0 for pain-free at two hours and headache relief at one and two hours, respectively<br>-25 and 50 mg are likely similar. 100 mg more effective.<br>-Relief of associated symptoms (nausea, photophobia, phonophobia) and use of rescue medication were better with sumatriptan than with placebo<br>-Adverse events were transient and mild and were more common with the sumatriptan than with placebo |
| Derry, 2012 <sup>8</sup>    | Subcutaneous sumatriptan (alone or in combination with an antiemetic compared with various interventions) | 35 RCTs (9,365)           | Search in 2011 but re-evaluation suggested stability of findings<br>- Fulfills all AMSTAR criteria                              | -Sumatriptan 6 mg vs placebo: NNTs were 2.9, 2.3, 2.2, and 2.1 for pain-free at one and two hours, and headache relief at one and two hours, respectively, and 6.1 for sustained pain-free at 1 day. Similar results for other doses<br>-Relief of headache-associated symptoms and use of rescue medications were greater with sumatriptan than with placebo                                                                 |
| Ferrari, 2001 <sup>9</sup>  | Rizatriptan                                                                                               | 7 RCTs (4,814)            | Search in 2001<br>- Fulfills most AMSTAR criteria, does not include clear risk of bias evaluation or a list of excluded studies | -Rizatriptan 10 mg was significantly more effective than placebo or rizatriptan 5 mg on pain relief and pain free at 2 hours and 1 day.                                                                                                                                                                                                                                                                                       |
| Mandema, 2005 <sup>10</sup> | Eletriptan (Compared with sumatriptan)                                                                    | 19 RCTs (11,400)          | Search in 2002                                                                                                                  | - Eletriptan 40 mg was associated with statistically                                                                                                                                                                                                                                                                                                                                                                          |

| Systematic Review           | Interventions          | Studies (Patients) | Methodology*                                                                                                                    | Main Findings                                                                                                                                                                                                                                                                     |
|-----------------------------|------------------------|--------------------|---------------------------------------------------------------------------------------------------------------------------------|-----------------------------------------------------------------------------------------------------------------------------------------------------------------------------------------------------------------------------------------------------------------------------------|
|                             |                        |                    | Only searched Medline with no clear description of study selection methods, risk of bias or excluded studies                    | significant efficacy compare with sumatriptan 100 mg at any point in time up to 4 h after treatment with an absolute difference at 2 h of 9.1% (7.4–11.5%) more patients achieving pain relief and 7.3% (5.8–8.6%) more patient achieving pain free                               |
| Menshaw, 2017 <sup>11</sup> | Intranasal sumatriptan | 16 RCTs (5,925)    | Search in 2016<br>- Fulfills all AMSTAR criteria, no list or clear description of excluded studies                              | -Intranasal sumatriptan was superior to placebo in pain relief at 2 h (RR = 1.70, 1.31,2.21) and headache relief at 30 min (RR = 1.31, 1.08, 1.59) and 2 h (RR = 1.58, 1.35, 1.84)<br>-Intranasal sumatriptan was associated with six-fold increase taste disturbances vs placebo |
| Poolsup, 2005 <sup>12</sup> | Frovatriptan           | 5 RCTs (2,866)     | Search in 2005<br>- Fulfills most AMSTAR criteria, does not include clear risk of bias evaluation or a list of excluded studies | -Frovatriptan 2.5 mg was more effective than placebo in rendering patient pain-free at 4 h and reducing headache severity and symptoms associated with migraine at 2 h.                                                                                                           |

h = hour; mg = milligram; NNT = number needed to treat; RCT = randomized clinical trial; RR = relative risk

**eTable 7.2. Results of systematic reviews evaluating nonsteroidal anti-inflammatory drugs (NSAIDs)**

| <b>Systematic Review</b>    | <b>Interventions</b>                                                                             | <b>Studies (Patients)</b> | <b>Methodology*</b>                                                                               | <b>Main Findings</b>                                                                                                                                                                                                                                                                                                                                                                                  |
|-----------------------------|--------------------------------------------------------------------------------------------------|---------------------------|---------------------------------------------------------------------------------------------------|-------------------------------------------------------------------------------------------------------------------------------------------------------------------------------------------------------------------------------------------------------------------------------------------------------------------------------------------------------------------------------------------------------|
| Derry, 2013 <sup>13</sup>   | Oral diclofenac (alone or in combination with an antiemetic compared with various interventions) | 5 RCTs (1,356)            | Search in 2011<br>-Fulfills all AMSTAR criteria                                                   | - A single dose of diclofenac potassium 50 mg, the NNTs were 6.2, 8.9, and 9.5 for pain-free at two hours, headache relief at two hours, and pain-free responses at 1 day, respectively.<br>-Associated symptoms of nausea, photophobia and phonophobia, and functional disability were reduced within two hours.<br>-Adverse events were mild and transient                                          |
| Kirithi, 2013 <sup>14</sup> | Aspirin (alone or in combination with an antiemetic compared with various interventions)         | 13 RCTs (4,222)           | Search in 2013<br>-Fulfills all AMSTAR criteria                                                   | -Aspirin 900 mg or 1000 mg vs placebo was effective with NNTs of 8.1, 4.9 and 6.6 for 2-hour pain-free, 2-hour headache relief, and 24-hour headache relief.<br>-Sumatriptan 50 mg did not differ from aspirin alone for 2-hour pain-free and headache relief, while sumatriptan 100 mg was better than the combination of aspirin plus metoclopramide for 2-hour pain-free, but not headache relief. |
| Rabbie, 2013 <sup>15</sup>  | Ibuprofen (alone or in combination with an antiemetic compared with various interventions)       | 9 RCTs (4,373)            | Search in 2013 but re-evaluation suggested stability of findings<br>-Fulfills all AMSTAR criteria | -Ibuprofen 400 mg vs placebo: NNTs for 2-hour pain-free (26% versus 12% with placebo), 2-hour headache relief (57% versus 25%) and 24-hour sustained headache relief (45%                                                                                                                                                                                                                             |

| Systematic Review           | Interventions | Studies (Patients) | Methodology*                                                                                      | Main Findings                                                                                                                                                                                                                                                                                                                            |
|-----------------------------|---------------|--------------------|---------------------------------------------------------------------------------------------------|------------------------------------------------------------------------------------------------------------------------------------------------------------------------------------------------------------------------------------------------------------------------------------------------------------------------------------------|
|                             |               |                    |                                                                                                   | versus 19%) were 7.2, 3.2 and 4.0, respectively.<br>-Ibuprofen 400 mg did not differ from rofecoxib 25 mg and was better than ibuprofen 200 mg.                                                                                                                                                                                          |
| Taggart, 2013 <sup>16</sup> | Ketorolac     | 8 RCTs (321)       | Search in 2010<br>-Fulfills all AMSTAR criteria, no list or clear description of excluded studies | -Ketorolac and meperidine resulted in similar pain scores at 60 minutes.<br>-Ketorolac was more effective than intranasal sumatriptan.<br>- Ketorolac was not significantly more effective in pain relief at 60 minutes compare with phenothiazine agents.<br>-Side effect profiles were similar between Ketorolac and comparison groups |

mg = milligram; NNT = number needed to treat; RCT = randomized clinical trial



**eTable 7.3. Results of systematic reviews evaluating multiple treatments**

| <b>Systematic Review</b>                          | <b>Interventions</b>                                    | <b>Studies (Patients)</b> | <b>Methodology*</b>                                                                                                                                               | <b>Main Findings</b>                                                                                                                                                                                                                                                                                                                                                                                                                         |
|---------------------------------------------------|---------------------------------------------------------|---------------------------|-------------------------------------------------------------------------------------------------------------------------------------------------------------------|----------------------------------------------------------------------------------------------------------------------------------------------------------------------------------------------------------------------------------------------------------------------------------------------------------------------------------------------------------------------------------------------------------------------------------------------|
| Law, 2016 <sup>17</sup>                           | Sumatriptan plus naproxen                               | 12 RCTs (7,345)           | Search in 2015<br>-Fulfills all AMSTAR criteria                                                                                                                   | -At two hours and compare with placebo, NNT for pain-free response was 3.1 for mild pain (50% response vs 18%), and 4.9 for moderate or severe pain (28% response vs 8%).<br>-Treating early, when pain was still mild, was significantly better than treating once pain was moderate or severe.<br>-Adverse events were mostly mild or moderate and rarely led to withdrawal.<br>-Combination treatment was superior to either monotherapy. |
| Xu, 2016 <sup>18</sup><br>(Network meta-analyses) | Triptans, NSAIDs and combination of triptans and NSAIDs | 88 RCTs (44,222)          | Searches in 1993-2016<br>Well-connected network geometry<br>Bayesian framework-<br>Fulfills all AMSTAR criteria, no list or clear description of excluded studies | -Sumatriptan and naproxen was effective, well tolerated and can be used for patients with partial response to either agent.                                                                                                                                                                                                                                                                                                                  |

mg = milligram; MOH = medication overdose headache; NMA = network meta-analysis; RCT = randomized clinical trial

\* Credibility was assessed using the AMSTAR tool (A measurement tool to assess systematic reviews)

**eTable 8. Characteristics of included studies evaluating CGRP, 5-HT<sub>1F</sub>, antiemetics, ergot alkaloids, opioids, other pharmacological interventions, and nonpharmacological interventions**

| Author, Year                 | Country, Study Design, Study Period                           | Study Setting (outpatient, inpatient, ED) | Intervention(s) and Comparison                       | Route of Administration, Dose and Duration                                                  | Length of Followup | Patient Characteristics                                    |
|------------------------------|---------------------------------------------------------------|-------------------------------------------|------------------------------------------------------|---------------------------------------------------------------------------------------------|--------------------|------------------------------------------------------------|
| Aggarwal, 2020 <sup>19</sup> | Crossover RCT in United States of America, 04/2017 to 02/2018 | Outpatient                                | Timolol                                              | Eye drop, 0.5% solution, once                                                               | 2 hours            | 26 Patients aged 41±10.5 years, 96% female                 |
|                              |                                                               |                                           | Placebo                                              | Eye drop, once                                                                              |                    |                                                            |
| Alemder, 2007 <sup>20</sup>  | Crossover RCT in Turkey                                       | ED                                        | Tramadol                                             | IV, 100 mg in 100 ml saline solution, once for 30 minutes                                   | 1 day              | 17 Patients aged 42 ± 11.5 years, 76.5% female, 100% White |
|                              |                                                               |                                           | Placebo                                              | IV, 100 ml saline solution, once for 30 minutes                                             | 1 day              | 17 Patients aged 37.1 ± 9 years, 88.2% female, 100% White  |
| Amiri, 2017 <sup>21</sup>    | RCT in Iran                                                   | ED                                        | Granisetron                                          | IV, 2 mg, once                                                                              | 4 hours            | 148 Patients aged 33.5 years, 68.2% female                 |
|                              |                                                               |                                           | Metoclopramide                                       | IV, 10 mg, once                                                                             | 4 hours            |                                                            |
| Antal, 2020 <sup>22</sup>    | RCT in Germany                                                | Outpatient                                | t ACS (Transcranial Alternating Current Stimulation) | Transcranial stimulation over the visual cortex, 0.4 mA, 140 Hz, for 15 min                 | 2 days             | 16 Patients aged 31.1±8.9 years                            |
|                              |                                                               |                                           | Sham stimulation                                     | Sham stimulation over the visual cortex, for 15 min                                         | 2 days             | 9 Patients aged 28.1±10.5 years                            |
| Ashina, 2021 <sup>23</sup>   | RCT in Europe, North America, and Asia                        | Outpatient                                | Lasmiditan 200 mg                                    | Oral, 200mg, once for four attacks                                                          | 2 days             | 486 Patients, aged 42±12 years, 86% female, 77% White      |
|                              |                                                               |                                           | Lasmiditan 100 mg                                    | Oral, 100 mg, once for four attacks                                                         | 2 days             | 485 Patients, aged 42±12 years, 83% female, 77% White      |
|                              |                                                               |                                           | Placebo                                              | Oral, placebo once for 3 attacks and Lasmiditan 50 mg for either the third or fourth attack | 2 days             | 500 Patients, aged 41±12 years, 83% female, 77% White      |

| Author, Year                 | Country, Study Design, Study Period                 | Study Setting (outpatient, inpatient, ED) | Intervention(s) and Comparison    | Route of Administration, Dose and Duration                                                                  | Length of Followup | Patient Characteristics                                                                                            |
|------------------------------|-----------------------------------------------------|-------------------------------------------|-----------------------------------|-------------------------------------------------------------------------------------------------------------|--------------------|--------------------------------------------------------------------------------------------------------------------|
| Aurora, 2011 <sup>24</sup>   | RCT in United States of America, 07/2008 to 03/2009 | Outpatient                                | Dihydroergotamine                 | Inhaled (orally), 0.6 mg emitted dose (1 mg nominal dose, or 0.5 mg systemic) once immediately after attack | 2 days             | 450 Patients aged 40.5 ± 11.3 years, 91.9% female, 8.9% African American, 88.1% White, 1.3% Asian, BMI 28 ± 6.6    |
|                              |                                                     |                                           | Placebo                           | Inhaled (orally), once immediately after attack                                                             | 2 days             | 453 Patients aged 39.6 ± 11.7 years, 91.2% female, 11.8% African American, 84.4% White, 3.0% Asian, BMI 27.9 ± 6.4 |
| Aurora, 2009 <sup>25</sup>   | RCT in United States of America, 07/2006 to 02/2007 | Outpatient                                | Placebo                           | Inhaled (orally), four times after attack                                                                   | 28 days            | 18 Patients aged 43.6 ± 9.4 years, 77.8% female, 94.4% White, 5.6% Asian                                           |
|                              |                                                     |                                           | Dihydroergotamine mesylate 0.5 mg | Inhaled (orally), 0.5 mg systemic dose (1 mg nominal dose), twice after attack                              | 28 days            | 35 Patients aged 41.3 ± 10.9 years, 85.7% female, 5.7% African American, 88.6% White, 5.7% Asian                   |
|                              |                                                     |                                           | Dihydroergotamine mesylate 1 mg   | Inhaled (orally), 1 mg systemic dose (2mg nominal dose), twice after attack                                 | 28 days            | 33 Patients aged 40 ± 10.6 years, 81.8% female, 84.8% White, 6.1% Asian                                            |
| Avcu, 2017 <sup>26</sup>     | RCT in Turkey, 01/2014 to 10/2014                   | ED                                        | Lidocaine 10%                     | Intranasal, 10%, once or twice after attack                                                                 | 3 days             | 81 Patients aged 36 ± 12 years, 69.1% female                                                                       |
|                              |                                                     |                                           | Placebo                           | Intranasal, 0.9% saline, once or twice after attack                                                         | 3 days             | 81 Patients aged 35 ± 11 years, 85.2% female                                                                       |
| Banerjee, 1991 <sup>27</sup> | RCT in United Kingdom                               | Outpatient                                | Propranolol                       | Oral, 40 mg, one to three times after attack                                                                | 2 days             | 25 Patients aged 35 ± 11.75 years, 84% female                                                                      |
|                              |                                                     |                                           | Placebo                           | Oral, one to three times after attack                                                                       | 2 days             |                                                                                                                    |

| Author, Year                | Country, Study Design, Study Period                       | Study Setting (outpatient, inpatient, ED) | Intervention(s) and Comparison | Route of Administration, Dose and Duration                                                                                                                                                                    | Length of Followup | Patient Characteristics                          |
|-----------------------------|-----------------------------------------------------------|-------------------------------------------|--------------------------------|---------------------------------------------------------------------------------------------------------------------------------------------------------------------------------------------------------------|--------------------|--------------------------------------------------|
| Bell, 1990 <sup>28</sup>    | RCT in Canada                                             | ED                                        | Chlorpromazine                 | IV, 12.5 mg, once to three times after attack                                                                                                                                                                 | 1 day              | 76 Patients, 78.9% female                        |
|                             |                                                           |                                           | Dihydroergotamine              | IV, 1 mg, once or twice after attack                                                                                                                                                                          | 1 day              |                                                  |
|                             |                                                           |                                           | Lidocaine                      | IV, 50 mg, one to three times after attack                                                                                                                                                                    | 1 day              |                                                  |
| Bigal, 2002 <sup>29</sup>   | RCT in Brazil, 01/01/1997 to 12/31/1999                   | ED                                        | Chlorpromazine                 | IV, 0.1 mg/kg in 10 ml 0.9% saline, once after attack                                                                                                                                                         | 1 day              | 68 Patients aged 34.65 years, 74.20% female      |
|                             |                                                           |                                           | Placebo                        | IV, 10 ml 0.9% saline, once after attack                                                                                                                                                                      | 1 day              | 60 Patients aged 27.70 years, 68.85% female      |
| Bigal, 2002 <sup>30</sup>   | RCT in Brazil, 04/01/1997 to 12/31/1999                   | Outpatient                                | Magnesium sulfate              | IV, 1 gr in 10 ml 0.9% saline, once after attack                                                                                                                                                              | 1 day              | 60 Patients aged 29.30 years, 74.80% female      |
|                             |                                                           |                                           | Placebo                        | IV, 10 ml 0.9% saline, once after attack                                                                                                                                                                      | 1 day              | 60 Patients aged 27.60 years, 68.40% female      |
| Blanda, 2001 <sup>31</sup>  | RCT in United States of America, 07/27/1997 to 11/11/1997 | ED                                        | Lidocaine 4%                   | Intranasal 0.5ml drops, two or four times for unilateral or bilateral pain, respectively                                                                                                                      | 1 day              | 27 Patients, 85.2% female                        |
|                             |                                                           |                                           | Placebo                        | Intranasal, 0.9% saline, 0.5 ml saline drops, two or four times for unilateral or bilateral pain, respectively                                                                                                | 1 day              | 22 Patients, 86.4% female                        |
| Borhani, 2010 <sup>32</sup> | Crossover RCT in Iran, 03/2007 to 03/2008                 | Outpatient                                | Menthol-Placebo                | Topical on forehead and temporal area, 1 ml of 10% solution of menthol crystals in ethanol, immediately after attack (Initial two attack treated with menthol and the second two attack treated with placebo) | N/A                | 17 Patients aged 29.8 ± 6.14 years, 76.5% female |

| Author, Year                 | Country, Study Design, Study Period                          | Study Setting (outpatient, inpatient, ED) | Intervention(s) and Comparison          | Route of Administration, Dose and Duration                                                                                                                                                      | Length of Followup | Patient Characteristics                                                                                             |
|------------------------------|--------------------------------------------------------------|-------------------------------------------|-----------------------------------------|-------------------------------------------------------------------------------------------------------------------------------------------------------------------------------------------------|--------------------|---------------------------------------------------------------------------------------------------------------------|
|                              |                                                              |                                           | Placebo-Menthol                         | Topical on forehead and temporal area, 1 ml of 0.5% ethanol menthol solution, immediately after attack (Initial two attack treated with placebo and the second two attack treated with menthol) | N/A                | 18 Patients aged 29.5 ± 6.4 years, 83.3% female                                                                     |
| Boureau, 1994 <sup>33</sup>  | Crossover RCT in France                                      | Outpatient                                | Acetaminophen 400 mg plus codeine 25 mg | Oral, 400 mg acetaminophen and 25 mg codeine once after attack                                                                                                                                  | 2 hours            | 494 Patients aged 40.1 ± 11.6 years, 76.90% female                                                                  |
|                              |                                                              |                                           | Placebo                                 | Oral, once after attack                                                                                                                                                                         | 2 hours            |                                                                                                                     |
| Brandes, 2020 <sup>34</sup>  | RCT in United States of America, United Kingdom, and Germany | Outpatient                                | Lasmiditan 100 mg                       | Oral, 100 mg for each new migraine attack of moderate or severe pain intensity within 4 h of pain onset                                                                                         | 365 days           | 1046 Patients aged 42.7 ± 12.3 years, 85.4% female, 18.8% African American, 77.5% White, 0.7% Asian, BMI 31.2 ± 8.2 |
|                              |                                                              |                                           | Lasmiditan 200 mg                       | Oral, 200 mg for each new migraine attack of moderate or severe pain intensity within 4 h of pain onset                                                                                         | 365 days           |                                                                                                                     |
| Callaham, 1986 <sup>35</sup> | RCT in United States of America, 06/1982 to 06/1984          | ED                                        | Dihydroergotamine                       | IV, 0.75 mg, once after attack                                                                                                                                                                  | 2 days             | 19 Patients                                                                                                         |
|                              |                                                              |                                           | Placebo                                 | IV, once after attack                                                                                                                                                                           | 2 days             | 15 Patients                                                                                                         |

| Author, Year                 | Country, Study Design, Study Period                     | Study Setting (outpatient, inpatient, ED) | Intervention(s) and Comparison                            | Route of Administration, Dose and Duration                                                                                                                                                             | Length of Followup    | Patient Characteristics                            |
|------------------------------|---------------------------------------------------------|-------------------------------------------|-----------------------------------------------------------|--------------------------------------------------------------------------------------------------------------------------------------------------------------------------------------------------------|-----------------------|----------------------------------------------------|
| Cameron, 1995 <sup>36</sup>  | RCT in Canada, 1990 to 1992                             | ED                                        | Chlorpromazine                                            | IV, 0.1 mg/kg, once (up to three times if needed during the first hour)                                                                                                                                | 2 days                | 47 Patients aged 32.60 ± 9.5 years, 80.90% female  |
|                              |                                                         |                                           | Metoclopramide                                            | IV, 0.1 mg/kg, once (up to three times if needed during the first hour)                                                                                                                                | 2 days                | 44 Patients aged 31.60 ± 8.75 years, 79.50% female |
| Carleton, 1998 <sup>37</sup> | RCT in the United States of America, 11/1991 to 08/1992 | ED                                        | Dihydroergotamine mesylate plus hydroxyzine hydrochloride | IM, dihydroergotamine mesylate, 1 mg, once (second dose after 1 hour if necessary), Hydroxyzine hydrochloride: Intramuscular, 0.70 mg/kg, once (second dose of 0.35 mg/kg after 1 hour if necessary)   | 1 day after discharge | 85 Patients aged 32.52 ± 8.82 years, 82.40% female |
|                              |                                                         |                                           | Meperidine plus hydroxyzine hydrochloride                 | IM meperidine, 1.5 mg/kg, once (second dose of 0.75 mg/kg after 1 hour if necessary), Hydroxyzine hydrochloride: Intramuscular, 0.70 mg/kg, once (second dose of 0.35 mg/kg after 1 hour if necessary) | 1 day after discharge | 85 Patients aged 32.36 ± 8.78 years, 82.40% female |
| Cete, 2005 <sup>38</sup>     | RCT in Turkey                                           | ED                                        | Metoclopramide plus normal saline                         | IV, 10 mg in 100 ml normal saline, once for 10 minutes                                                                                                                                                 | 1 day after discharge | 37 Patients aged 40 ± 13 years, 89% female         |
|                              |                                                         |                                           | Magnesium sulfate plus normal saline                      | IV, 2 g in 100 ml normal saline, once for 10 minutes                                                                                                                                                   | 1 day after discharge | 36 Patients aged 40 ± 12 years, 75% female         |

| Author, Year                | Country, Study Design, Study Period                           | Study Setting (outpatient, inpatient, ED) | Intervention(s) and Comparison              | Route of Administration, Dose and Duration                                                                                                                                                                                                                                                                           | Length of Followup     | Patient Characteristics                          |
|-----------------------------|---------------------------------------------------------------|-------------------------------------------|---------------------------------------------|----------------------------------------------------------------------------------------------------------------------------------------------------------------------------------------------------------------------------------------------------------------------------------------------------------------------|------------------------|--------------------------------------------------|
|                             |                                                               |                                           | Placebo                                     | IV, 100 mL normal saline once for 10 minutes                                                                                                                                                                                                                                                                         | 1 day after discharge  | 40 Patients aged 40 ± 11 years, 88% female       |
| Chou, 2019 <sup>39</sup>    | RCT in the United States of America, 02/01/2016 to 03/31/2017 | ED                                        | Verum external trigeminal nerve stimulation | Transcutaneously, 1.284 C (total maximum dose), high frequency pulse of 100 Hz with pulse width of 250 µs for 1 hour                                                                                                                                                                                                 | 1 day                  | 52 Patients aged 39.71 ± 13.62 years, 83% female |
|                             |                                                               |                                           | Sham external trigeminal nerve stimulation  | Transcutaneously, low frequency pulse of 3 Hz with pulse width of 250 µs for 1 hour                                                                                                                                                                                                                                  | 1 day                  | 54 Patients aged 40.09 ± 12.65 years, 91% female |
| Coppola, 1995 <sup>40</sup> | RCT in the United States of America, 11/1991 to 06/1993       | ED                                        | Metoclopramide hydrochloride                | IV, 10 mg in 2 mL, once for 2 minutes                                                                                                                                                                                                                                                                                | 2 days after discharge | 24 Patients                                      |
|                             |                                                               |                                           | Prochlorperazine                            | IV, 10 mg in 2 mL, once for 2 minutes                                                                                                                                                                                                                                                                                | 2 days after discharge | 22 Patients                                      |
|                             |                                                               |                                           | Placebo                                     | IV, 2 mL, normal saline, once for 2 minutes                                                                                                                                                                                                                                                                          | 2 days after discharge | 24 Patients                                      |
| Corbo, 2001 <sup>41</sup>   | RCT in the United States of America                           | ED                                        | Metoclopramide plus magnesium sulfate       | IV, Metoclopramide: 20 mg, once for 2 minutes every 15 minutes as needed for pain up to a total of 3 doses or relief of pain, Magnesium sulfate: 2 g in a 10% normal saline solution (a total solution of 50 ml), once for 10 minutes every 15 minutes as needed for pain up to a total of 3 doses or relief of pain | 1 day                  | 21 Patients aged 39 ± 12 years, 95% female       |

| Author, Year                  | Country, Study Design, Study Period                           | Study Setting (outpatient, inpatient, ED) | Intervention(s) and Comparison | Route of Administration, Dose and Duration                                                                                                                                                                                                                     | Length of Followup | Patient Characteristics                                                                                                                                                                                    |
|-------------------------------|---------------------------------------------------------------|-------------------------------------------|--------------------------------|----------------------------------------------------------------------------------------------------------------------------------------------------------------------------------------------------------------------------------------------------------------|--------------------|------------------------------------------------------------------------------------------------------------------------------------------------------------------------------------------------------------|
|                               |                                                               |                                           | Metoclopramide plus placebo    | IV, Metoclopramide: 20 mg, once for 2 minutes every 15 minutes as needed for pain up to a total of 3 doses or relief of pain, placebo: 50 ml normal saline, once for 10 minutes every 15 minutes as needed for pain up to a total of 3 doses or relief of pain | 1 day              | 23 Patients aged 37 ± 8 years, 96% female                                                                                                                                                                  |
| Croop, 2019 <sup>42</sup>     | RCT in the United States of America, 02/27/2018 to 08/28/2018 | Outpatient                                | Rimegepant                     | Sublingual, 75 mg, once                                                                                                                                                                                                                                        | 7-9 days           | 732 Patients aged 40.3 ± 12.1 years, 85% female, 74% White, 21% African American, 1% Asian, 1% American Indian or Alaska Native, 2% Native Hawaiian or other Pacific Islander, 1% Multiple, BMI 31.1 ± 8.2 |
|                               |                                                               |                                           | Placebo                        | Sublingual, once                                                                                                                                                                                                                                               | 7-9 days           | 734 Patients aged 40 ± 11.9 years, 85% female, 76% White, 18% African American, 3% Asian, <1% American Indian or Alaska Native, 1% Native Hawaiian or other Pacific Islander, 1% Multiple, BMI 30.6 ± 8    |
| Demirkaya, 2001 <sup>43</sup> | Crossover RCT in Turkey                                       | Outpatient                                | Magnesium sulfate              | IV, 1 g, once for 15 minutes                                                                                                                                                                                                                                   | 1 day              | 15 Patients (Magnesium sulfate), 15 Patients                                                                                                                                                               |



| Author, Year                 | Country, Study Design, Study Period                               | Study Setting (outpatient, inpatient, ED) | Intervention(s) and Comparison                              | Route of Administration, Dose and Duration                                                                                                                            | Length of Followup | Patient Characteristics                                                                                                                                                                            |
|------------------------------|-------------------------------------------------------------------|-------------------------------------------|-------------------------------------------------------------|-----------------------------------------------------------------------------------------------------------------------------------------------------------------------|--------------------|----------------------------------------------------------------------------------------------------------------------------------------------------------------------------------------------------|
|                              |                                                                   |                                           | Placebo                                                     | IV, 10 mL, 0.9% saline, once, once. After 30 minutes IV, 1 gr of Magnesium sulfate over 15 minutes for those with persistent complaints of pain, nausea, and vomiting | 1 day              | (Placebo), age 35 ± 8.9 years (entire population)                                                                                                                                                  |
| Derosier, 2010 <sup>44</sup> | Crossover RCT in the United States of America, 12/2007 to 08/2009 | Outpatient                                | Butalbital, acetaminophen, caffeine                         | Oral, butalbital 50 mg, acetaminophen 325 mg, and caffeine 40 mg, once                                                                                                | 2 days             | Entire population: 392 Patients (Butalbital, Acetaminophen, Caffeine), 405 Patients (Placebo), age 42.6 ± 7.8 years, 88% female, 83% White (entire population), 14% African American, BMI 27.3 ± 7 |
|                              |                                                                   |                                           | Placebo                                                     | Oral, once                                                                                                                                                            | 2 days             |                                                                                                                                                                                                    |
| Dexter, 1985 <sup>45</sup>   | RCT in the United Kingdom                                         | Outpatient                                | Paracetamol plus metoclopramide                             | Oral, 2 tablets, paracetamol 500 mg, metoclopramide 5 mg, once (up to three times)                                                                                    | 112 days           | 22 Patients aged 32 years, 77.27% female                                                                                                                                                           |
|                              |                                                                   |                                           | Placebo                                                     | Oral, once (up to three times)                                                                                                                                        | 112 days           | 27 Patients aged 33 years, 59.26% female                                                                                                                                                           |
| Diamond, 1976 <sup>46</sup>  | Crossover RCT in the United States of America                     | Outpatient                                | Isometheptene mucate, acetaminophen, and dichloralphenazone | Oral, isometheptene mucate 65 mg, acetaminophen 325 mg, and dichloralphenazone 100 mg, twice (up to five times)                                                       | 14-60 days         | Entire population: 168 Patients aged 49 ± 9.75 years, 71.4% female                                                                                                                                 |

| Author, Year               | Country, Study Design, Study Period                                                                                               | Study Setting (outpatient, inpatient, ED) | Intervention(s) and Comparison | Route of Administration, Dose and Duration                                                                                                                                                               | Length of Followup | Patient Characteristics                                                    |
|----------------------------|-----------------------------------------------------------------------------------------------------------------------------------|-------------------------------------------|--------------------------------|----------------------------------------------------------------------------------------------------------------------------------------------------------------------------------------------------------|--------------------|----------------------------------------------------------------------------|
|                            |                                                                                                                                   |                                           | Acetaminophen                  | Oral, 325 mg, twice (up to five times)                                                                                                                                                                   | 14-60 days         |                                                                            |
|                            |                                                                                                                                   |                                           | Placebo                        | Oral, corn starch and talc, twice (up to five times)                                                                                                                                                     | 14-60 days         |                                                                            |
| Diener, 2002 <sup>47</sup> | RCT in Australia, Denmark, Finland, France, Germany, Netherlands, Norway, Spain, Sweden, UK, London, Israel, South Africa, Poland | Outpatient                                | Caffeine plus ergotamine       | Oral, 1 mg ergotamine tartrate with 100 mg caffeine, once or twice                                                                                                                                       | 7-14 days          | 203 Patients aged 42 ± 11 years, 86% female                                |
|                            |                                                                                                                                   |                                           | Placebo                        | Oral, once or twice                                                                                                                                                                                      | 7-14 days          | 106 Patients aged 40 ± 10 years, 86% female                                |
| Dodick, 2019 <sup>48</sup> | RCT in United States of America, 07/22/2016 to 12/14/2017                                                                         | Outpatient                                | Ubrogepant 100 mg              | Oral, 100 mg (2 tablets of ubrogepant 50 mg), once. An optional second dose of either 2 tablets of placebo, 2 tablets of 50 mg ubrogepant was allowed.                                                   | 4 weeks            | 557 Patients aged 40.6±12 years, 86.2% female, 80.8% White, BMI 30.4±8     |
|                            |                                                                                                                                   |                                           | Ubrogepant 50 mg               | Oral, 50 mg (one tablet ubrogepant 50 mg and one tablet placebo), once. An optional second dose of either 2 tablets of placebo, or one tablet of 50 mg ubrogepant and one tablet of placebo was allowed. |                    | 556 Patients aged 40.1±11.7 years, 89.7% female, 82.2% White, BMI 30.2±8.1 |

| Author, Year                  | Country, Study Design, Study Period                 | Study Setting (outpatient, inpatient, ED) | Intervention(s) and Comparison | Route of Administration, Dose and Duration                                                                               | Length of Followup | Patient Characteristics                                                                          |
|-------------------------------|-----------------------------------------------------|-------------------------------------------|--------------------------------|--------------------------------------------------------------------------------------------------------------------------|--------------------|--------------------------------------------------------------------------------------------------|
|                               |                                                     |                                           | Placebo                        | Oral, 2 tablets, once. An optional second dose of 2 tablets of placebo was allowed.                                      |                    | 559 Patients aged 40.9±11.7 years, 88.7% female, 84.5% White, BMI 30±7.4                         |
| Dogan, 2019 <sup>49</sup>     | RCT in Turkey, 12/2014 to 01/2017                   | ED                                        | Metoclopramide                 | IV, 10 mg in 100 mL normal saline solution, once for 10 minutes                                                          | 1-3 days           | 74 Patients aged 35 ± 13.3 years, 67.6% female                                                   |
|                               |                                                     |                                           | Placebo                        | IV, 100 mL normal saline, once for 10 minutes                                                                            | 1-3 days           | 74 Patients aged 33 ± 13.3 years, 62.2% female                                                   |
| Donaldson, 2008 <sup>50</sup> | RCT in United States of America, 11/2004 to 11/2005 | ED                                        | Placebo                        | IV, 24 mg (5ml) once                                                                                                     | 30 days            | 53 Patients aged 35.17 years, 73.6% female                                                       |
|                               |                                                     |                                           | Dexamethasone                  | IV, 24 mg (5ml) once                                                                                                     | 30 days            | 62 Patients aged 37.48 years, 87.1% female                                                       |
| Etchison, 2018 <sup>51</sup>  | RCT in United States of America, 03/2016 to 03/2017 | ED                                        | Ketamine                       | IV, 0.2 mg/kg in 30 ml aliquots, once for 1 minute                                                                       | 1 hour             | 16 Patients aged 38.5 ± 13.75 years, 81% female, 19% African American, 62% White, 19% other      |
|                               |                                                     |                                           | Placebo                        | IV, 0.2 mg/kg saline in 30 ml aliquots, once for 1 minute                                                                | 1 hour             | 18 Patients aged 30.5 ± 8.3 years, 72% female, 11% African American, 72% White, 17% other        |
| Farahmand, 2018 <sup>52</sup> | RCT in Iran, 03/2015 to 05/2016                     | Outpatient                                | Verum acupuncture              | Skin, sterile metallic needles with a width of 0.25 mm and length of 13 mm, which enter certain points in the ear's skin | 1 day              | 30 Patients (Acupuncture), 30 Patients (Acupuncture placebo) aged 31.4 ± 7.6 years, 83.3% female |

| Author, Year                 | Country, Study Design, Study Period                                          | Study Setting (outpatient, inpatient, ED) | Intervention(s) and Comparison           | Route of Administration, Dose and Duration                                                                                                    | Length of Followup | Patient Characteristics                                     |
|------------------------------|------------------------------------------------------------------------------|-------------------------------------------|------------------------------------------|-----------------------------------------------------------------------------------------------------------------------------------------------|--------------------|-------------------------------------------------------------|
|                              |                                                                              |                                           | Sham acupuncture                         | Skin, sterile metallic needles with a width of 0.25 mm and length of 13 mm, inserted into inappropriate acupoints (stomach, and spleen), once | 1 day              |                                                             |
| Farkkila, 2012 <sup>53</sup> | RCT in Finland, Germany, France, Spain and Belgium, 07/08/2009 to 02/18/2010 | Outpatient                                | Placebo                                  | Oral, once                                                                                                                                    | 14 days            | 103 Patients aged 40.5 ± 10.3 years, 87% female, 100% White |
|                              |                                                                              |                                           | Lasmiditan 50 mg                         | Oral, 50 mg, once                                                                                                                             | 14 days            | 106 Patients aged 40.4 ± 12.5 years, 84% female, 99% White  |
|                              |                                                                              |                                           | Lasmiditan 100 mg                        | Oral, 100 mg, once                                                                                                                            | 14 days            | 104 Patients aged 42 ± 10.6 years, 83% female, 99% White    |
|                              |                                                                              |                                           | Lasmiditan 200 mg                        | Oral, 200 mg, once                                                                                                                            | 14 days            | 100 Patients aged 39.5 ± 10.3 years, 92% female, 99% White  |
|                              |                                                                              |                                           | Lasmiditan 400 mg                        | Oral, 400 mg, once                                                                                                                            | 14 days            | 99 Patients aged 38.7 ± 10.3 years, 93% female, 99% White   |
| Fernando, 2019 <sup>54</sup> | RCT in United States of America, 11/2016 to 12/2017                          | ED                                        | Buccally absorbed prochlorperazine (BAP) | Buccally (under the upper lip), 6 mg of BAP + 2.25 mL IV normal saline solution                                                               | 1-2 days           | 40 Patients aged 38.8 ± 12.3 years, 87% female              |
|                              |                                                                              |                                           | Intravenous prochlorperazine (IVP)       | IV, 10 mg of IVP in a volume of 2.25 mL + buccal saccharine pills                                                                             | 1-2 days           | 40 Patients aged 37.3 ± 12.2 years, 65% female              |
| Ferrari, 2010 <sup>55</sup>  | RCT in The Netherlands, Finland,                                             | Outpatient                                | Placebo                                  | IV, 60 mL infusion, once for 20 minutes                                                                                                       | 1 day              | 42 Patients aged 40.3 ± 7.3 years, 90.5% female, 100% White |

| Author, Year                     | Country, Study Design, Study Period | Study Setting (outpatient, inpatient, ED) | Intervention(s) and Comparison | Route of Administration, Dose and Duration                                                                                 | Length of Followup | Patient Characteristics                                                           |
|----------------------------------|-------------------------------------|-------------------------------------------|--------------------------------|----------------------------------------------------------------------------------------------------------------------------|--------------------|-----------------------------------------------------------------------------------|
|                                  | Germany, 08/2006 to 07/2007         |                                           | Lasmiditan 2.5 mg              | IV, 2.5 mg in 60 mL infusion, once for 20 minutes                                                                          | 1 day              | 4 Patients aged 46.8 ± 7.3 years, 75% female, 100% White                          |
|                                  |                                     |                                           | Lasmiditan 5 mg                | IV, 5 mg in 60 mL infusion, once for 20 minutes                                                                            | 1 day              | 12 Patients aged 39.2 ± 7.3 years, 83.3% female, 91.7% White, 8.3% Non-Caucasian  |
|                                  |                                     |                                           | Lasmiditan 10 mg               | IV, 10 mg in 60 mL infusion, once for 20 minutes                                                                           | 1 day              | 24 Patients aged 34.2 ± 7.3 years, 87.5% female, 83.3% White, 16.7% Non-Caucasian |
|                                  |                                     |                                           | Lasmiditan 20 mg               | IV, 20 mg in 60 mL infusion, once for 20 minutes                                                                           | 1 day              | 28 Patients aged 38.9 ± 7.3 years, 85.7% female, 100% White                       |
|                                  |                                     |                                           | Lasmiditan 30 mg               | IV, 30 mg in 60 mL infusion, once for 20 minutes                                                                           | 1 day              | 16 Patients aged 40.3 ± 7.3 years, 87.5% female, 100% white                       |
|                                  |                                     |                                           | Lasmiditan 45 mg               | IV, 45 mg in 60 mL infusion, once for 20 minutes                                                                           | 1 day              | 4 Patients aged 40.8 ± 7.3 years, 75% female, 100% White                          |
| Foroughipour, 2013 <sup>56</sup> | RCT in Iran, during 2011            | ED                                        | Valproate                      | IV, 900 mg (diluted in 150 cc normal saline) (Patients at a minimum weight of 90 kg received 1200 mg), once for 10 minutes | 3 days             | 20 Patients aged 33.9 ± 13.34 years, 89% female                                   |
|                                  |                                     |                                           | Dexamethasone                  | IV, 16 mg (diluted in 150 cc normal saline) (Patients at a minimum weight of 90 kg received 20 mg), once for 10 minutes    | 3 days             | 20 Patients aged 32.5 ± 11.12 years, 92% female                                   |

| Author, Year                 | Country, Study Design, Study Period                 | Study Setting (outpatient, inpatient, ED) | Intervention(s) and Comparison | Route of Administration, Dose and Duration                                                                                                                                                                                               | Length of Followup | Patient Characteristics                                                                 |
|------------------------------|-----------------------------------------------------|-------------------------------------------|--------------------------------|------------------------------------------------------------------------------------------------------------------------------------------------------------------------------------------------------------------------------------------|--------------------|-----------------------------------------------------------------------------------------|
| Freitag, 1993 <sup>57</sup>  | RCT in United States of America                     | ED                                        | Transnasal butorphanol         | Intranasal, 1 mg, twice                                                                                                                                                                                                                  | 6 hours            | 32 Patients aged 39.4 ± 9.25 years, 97% White, 3% African American                      |
|                              |                                                     |                                           | Methadone                      | IM, 10 mg, once                                                                                                                                                                                                                          | 6 hours            | 32 Patients aged 38.4 ± 9.5 years, 91% White, 6% African American                       |
|                              |                                                     |                                           | Placebo                        | Intranasal spray, twice, and IM, once                                                                                                                                                                                                    | 6 hours            | 32 Patients aged 37.2 ± 11.75 years, 97% White, 3% African American                     |
| Friedman, 2007 <sup>58</sup> | RCT in United States of America, 07/2005 to 07/2006 | ED                                        | Dexamethasone sodium phosphate | IV, 10 mg                                                                                                                                                                                                                                | 1 day              | 106 Patients aged 36 ± 10 years, 82% female, 27% African American, 6% White, 69% Latino |
|                              |                                                     |                                           | Placebo                        | IV                                                                                                                                                                                                                                       | 1 day              | 99 Patients aged 37 ± 11 years, 88% female, 22% African American, 2% White, 70% Latino  |
| Friedman, 1989 <sup>59</sup> | RCT in United States of America                     | Outpatient                                | Cafergot P-B                   | Oral, 2 tablets at the first signs of a migraine, one tablet after 0.5 hour and another after 1 hour of the first dose. One tablet after 1.5 hour and another after 2 hours of the first dose if needed for a maximum dose of 6 tablets. | 3 hours            | Entire population: 254 Patients aged 34.4 years, 87.4% female                           |

| Author, Year                 | Country, Study Design, Study Period                 | Study Setting (outpatient, inpatient, ED) | Intervention(s) and Comparison | Route of Administration, Dose and Duration                                                                                                                                                                                               | Length of Followup | Patient Characteristics                                                                                               |
|------------------------------|-----------------------------------------------------|-------------------------------------------|--------------------------------|------------------------------------------------------------------------------------------------------------------------------------------------------------------------------------------------------------------------------------------|--------------------|-----------------------------------------------------------------------------------------------------------------------|
|                              |                                                     |                                           | Cafergot                       | Oral, 2 tablets at the first signs of a migraine, one tablet after 0.5 hour and another after 1 hour of the first dose. One tablet after 1.5 hour and another after 2 hours of the first dose if needed for a maximum dose of 6 tablets. | 3 hours            |                                                                                                                       |
|                              |                                                     |                                           | Placebo                        | Oral, 2 tablets at the first signs of a migraine, one tablet after 0.5 hour and another after 1 hour of the first dose. One tablet after 1.5 hour and another after 2 hours of the first dose if needed for a maximum dose of 6 tablets. | 3 hours            |                                                                                                                       |
| Friedman, 2008 <sup>60</sup> | RCT in United States of America, 08/2006 to 03/2007 | ED                                        | Prochlorperazine               | IV, 10 mg, once for 15 minutes                                                                                                                                                                                                           | 1 day              | 39 Patients aged 34 ± 10 years, 85% female, 36% African American, 51% White, 3% Asian, 62% Hispanic/Latino, 10% other |
|                              |                                                     |                                           | Metoclopramide                 | IV, 20 mg, once for 15 minutes                                                                                                                                                                                                           | 1 day              | 38 Patients aged 38 ± 12 years, 95% female, 42% African American, 53% White, 68% Hispanic/Latino, 5% other            |

| Author, Year                 | Country, Study Design, Study Period                 | Study Setting (outpatient, inpatient, ED) | Intervention(s) and Comparison            | Route of Administration, Dose and Duration                               | Length of Followup | Patient Characteristics                                                                                                        |
|------------------------------|-----------------------------------------------------|-------------------------------------------|-------------------------------------------|--------------------------------------------------------------------------|--------------------|--------------------------------------------------------------------------------------------------------------------------------|
| Friedman, 2011 <sup>61</sup> | RCT in United States of America, 05/2008 to 02/2010 | ED                                        | Metoclopramide 10 mg plus diphenhydramine | IV, 10 mg metoclopramide plus 25 mg diphenhydramine, once for 20 minutes | 2 days             | 113 Patients aged 39 ± 11 years, 83% female, 28% African American, 18% White, 70% Hispanic, 0.9% previous opioid use           |
|                              |                                                     |                                           | Metoclopramide 20 mg plus diphenhydramine | IV, 20 mg metoclopramide plus 25 mg diphenhydramine, once for 20 minutes | 2 days             | 118 Patients aged 37 ± 10 years, 87% female, 28% African American, 20% White, 1% Asian, 70% Hispanic, 3.4% previous opioid use |
|                              |                                                     |                                           | Metoclopramide 40 mg plus diphenhydramine | IV, 40 mg metoclopramide plus 25 mg diphenhydramine, once for 20 minutes | 2 days             | 118 Patients aged 38 ± 12 years, 82% female, 20% African American, 19% White, 1% Asian, 76% Hispanic, 3.4% previous opioid use |
| Friedman, 2016 <sup>62</sup> | RCT in United States of America, 04/2013 to 12/2015 | ED                                        | Diphenhydramine plus metoclopramide       | IV, diphenhydramine 50 mg plus metoclopramide 10 mg, once                | 2 days             | 104 Patients aged 41 ± 11 years, 85% female                                                                                    |
|                              |                                                     |                                           | Placebo plus metoclopramide               | IV, placebo (saline solution) plus metoclopramide 10 mg, once            | 2 days             | 104 Patients aged 36 ± 10 years, 89% female                                                                                    |
| Friedman, 2018 <sup>63</sup> | RCT in United States of America, 08/2015 to 01/2018 | ED                                        | Sham injection                            | Intradermally, 0.5 mL bupivacaine 0.5% bilaterally (1 mL total), once    | 2 days             | 15 Patients aged 40 ± 12 years, 80% female                                                                                     |
|                              |                                                     |                                           | Greater occipital nerve block             | Intradermally, 3 mL bupivacaine 0.5% bilaterally (6 mL total), once      | 2 days             | 13 Patients aged 35 ± 10 years, 92% female                                                                                     |



| Author, Year                 | Country, Study Design, Study Period                 | Study Setting (outpatient, inpatient, ED) | Intervention(s) and Comparison           | Route of Administration, Dose and Duration                                                                                                                                                                                  | Length of Followup | Patient Characteristics                                                           |
|------------------------------|-----------------------------------------------------|-------------------------------------------|------------------------------------------|-----------------------------------------------------------------------------------------------------------------------------------------------------------------------------------------------------------------------------|--------------------|-----------------------------------------------------------------------------------|
| Friedman, 2017 <sup>64</sup> | RCT in United States of America, 03/2015 to 06/2016 | ED                                        | Prochlorperazine plus diphenhydramine    | IV, 10 mg prochlorperazine plus 25 mg diphenhydramine, once for 5 minutes (additional optional dose after one hour)                                                                                                         | 90 days            | 63 Patients aged 32 ± 9 years, 79% female,                                        |
|                              |                                                     |                                           | Hydromorphone plus normal saline placebo | IV, 1 mg hydromorphone, once for 5 minutes (additional optional dose after one hour)                                                                                                                                        | 90 days            | 64 Patients aged 35 ± 11 years, 88% female,                                       |
| Friedman, 2020 <sup>65</sup> | RCT in USA, 11/2017 to 03/2020                      | ED                                        | Greater occipital nerve block            | Adjacent to the greater occipital nerve, Total of 6 mL of bupivacaine 0.5% (3 ml each side) once, in addition to an IV drip of normal saline placebo administered over 15 min                                               | 2 days             | 51 Patients aged 39±11 years, 86% female                                          |
|                              |                                                     |                                           | Metoclopramide                           | Sham great occipital nerve block, total of 6 ml of normal saline injected adjacent to the greater occipital nerve bilaterally (3 ml each side), in addition to an IV drip of 10 mg metoclopramide administered over 15 min. | 2 days             | 48 Patients aged 38±11 years, 71% female                                          |
| Fuglsang, 2018 <sup>66</sup> | Crossover RCT in Denmark,                           | Outpatient                                | Active partial rebreathing device        | Oral, twice for 40 minutes (20 minutes at the onset of the aura followed by 20 minutes after 40 minutes)                                                                                                                    | 1 day              | Entire population: 11 Patients aged 35.5 ± 12 years, 72.7% female, 100% Caucasian |

| Author, Year                  | Country, Study Design, Study Period                                       | Study Setting (outpatient, inpatient, ED) | Intervention(s) and Comparison      | Route of Administration, Dose and Duration                                                               | Length of Followup | Patient Characteristics                                                        |
|-------------------------------|---------------------------------------------------------------------------|-------------------------------------------|-------------------------------------|----------------------------------------------------------------------------------------------------------|--------------------|--------------------------------------------------------------------------------|
|                               | 11/2016 to 10/2017                                                        |                                           | Sham partial rebreathing device     | Oral, twice for 40 minutes (20 minutes at the onset of the aura followed by 20 minutes after 40 minutes) | 1 day              |                                                                                |
| Gaffigan, 2015 <sup>67</sup>  | RCT in United States of America, 06/2013 to 02/2014                       | ED                                        | Diphenhydramine plus haloperidol    | IV, diphenhydramine 25 mg plus haloperidol 5 mg, once for 2 minutes                                      | 14 days            | 31 Patients aged 29 ± 8 years, 87% female                                      |
|                               |                                                                           |                                           | Diphenhydramine plus metoclopramide | IV, diphenhydramine 25 mg plus metoclopramide 10 mg, once for 2 minutes                                  | 14 days            | 33 Patients aged 29 ± 8 years, 76% female                                      |
| Gallagher, 1996 <sup>68</sup> | RCT in United States of America, 04/1993 to 06/1994                       | Outpatient                                | Dihydroergotamine mesylate 3 mg     | Intranasal, 3 mg, 3 times in each nostril                                                                | 1 day              | Entire population: 348 Patients aged 40 ± 7.8 years                            |
|                               |                                                                           |                                           | Dihydroergotamine mesylate 2 mg     | Intranasal, 2 mg, 3 times in each nostril                                                                | 1 day              |                                                                                |
|                               |                                                                           |                                           | Placebo                             | Intranasal, 3 times in each nostril                                                                      | 1 day              |                                                                                |
| Gerhardt, 2011 <sup>69</sup>  | RCT in United States of America, 01/2002 to 04/2003                       | Outpatient                                | Secobarbital                        | Oral, 100 mg, once or twice                                                                              | 3 days             | 14 Patients aged 45 ± 1.25 years, 94% female                                   |
|                               |                                                                           |                                           | Placebo                             | Oral, once or twice                                                                                      | 3 days             | 16 Patients aged 44 ± 3.25 years, 100% female                                  |
| Goadsby, 2019 <sup>70</sup>   | RCT in United States of America, UK and Germany, 05/19/2016 to 06/29/2017 | Outpatient                                | Lasmiditan 200 mg                   | Oral, 200 mg, once within 4 hours of onset of migraine attack                                            | 7 days             | 721 Patients aged 41.8 ± 12.4 years, 82.6% female, 80.4% White, BMI 30.1 ± 8.2 |
|                               |                                                                           |                                           | Lasmiditan 100 mg                   | Oral, 100 mg, once within 4 hours of onset of migraine attack                                            | 7 days             | 721 Patients aged 43.4 ± 12.6 years, 84.9% female, 80.2% White, BMI 30.1 ± 8.3 |

| Author, Year                    | Country, Study Design, Study Period       | Study Setting (outpatient, inpatient, ED) | Intervention(s) and Comparison            | Route of Administration, Dose and Duration                                                                       | Length of Followup | Patient Characteristics                                                                         |
|---------------------------------|-------------------------------------------|-------------------------------------------|-------------------------------------------|------------------------------------------------------------------------------------------------------------------|--------------------|-------------------------------------------------------------------------------------------------|
|                                 |                                           |                                           | Lasmiditan 50 mg                          | Oral, 50 mg, once within 4 hours of onset of migraine attack                                                     | 7 days             | 716 Patients aged 42.8 ± 13.2 years, 84.7% female, 80.1% White, BMI 29.7 ± 7.6                  |
|                                 |                                           |                                           | Placebo                                   | Oral, once within 4 hours of onset of migraine attack                                                            | 7 days             | 711 Patients aged 42.6 ± 12.9 years, 84.5% female, 80% White, BMI 30.4 ± 11.1                   |
| Hakkarainen, 1982 <sup>71</sup> | Crossover RCT, in Finland                 | Outpatient                                | Ergotamine 1 mg                           | Rectal, once after attack                                                                                        | NR                 | Entire population: 24 Patients aged 36.3 ± 9 years, 100% female                                 |
|                                 |                                           |                                           | Metoclopramide 20 mg                      | Rectal, once after attack                                                                                        |                    |                                                                                                 |
|                                 |                                           |                                           | Ergotamine 1 mg plus metoclopramide 20 mg | Rectal, once after attack                                                                                        |                    |                                                                                                 |
|                                 |                                           |                                           | Ergotamine 2 mg plus metoclopramide 20 mg | Rectal, once after attack                                                                                        |                    |                                                                                                 |
| Hoffert, 1992 <sup>72</sup>     | Crossover RCT in United States of America | Outpatient                                | Nifedipine                                | Oral, 20 mg, at onset of the aura. If aura persisted allowed to repeat dose every 20 minutes to the maximum dose | NR                 | Entire population: 14 Patients (Nifedipine), 13 Patients (Placebo) aged 33 ± 5.75, 66.6% female |
|                                 |                                           |                                           | Placebo                                   | Oral, at onset of the aura. If aura persisted allowed to repeat dose every 20 minutes to the maximum dose        |                    |                                                                                                 |

| Author, Year                | Country, Study Design, Study Period | Study Setting (outpatient, inpatient, ED) | Intervention(s) and Comparison | Route of Administration, Dose and Duration                                                                                                                                                                                   | Length of Followup | Patient Characteristics                                                                           |
|-----------------------------|-------------------------------------|-------------------------------------------|--------------------------------|------------------------------------------------------------------------------------------------------------------------------------------------------------------------------------------------------------------------------|--------------------|---------------------------------------------------------------------------------------------------|
| Hoffert, 1995 <sup>73</sup> | RCT in Unites States of America     | Outpatient                                | Butorphanol                    | Intranasal, 1 mg per spray, immediately after attack, additional doses were allowed within 30-90 minutes if pain relief had not been achieved then every 2-4 hours as needed, with a maximum of 12 sprays allowed over 1 day | 2 days             | 107 Patients aged 41 ± 7 years, 85% female, 90% White, 7% African American, 1% Asian, 1% Hispanic |
|                             |                                     |                                           | Placebo                        | Intranasal, immediately after attack, additional doses were allowed within 30-90 minutes if pain relief had not been achieved then every 2-4 hours as needed, with a maximum of 12 sprays allowed over 1 day                 |                    | 50 Patients aged 40.6 ± 10.25 years, 82% female, 96% White, 4% African American                   |

| Author, Year                | Country, Study Design, Study Period | Study Setting (outpatient, inpatient, ED) | Intervention(s) and Comparison | Route of Administration, Dose and Duration                                                                                                                                                                                                                                                                                                                                                                                | Length of Followup | Patient Characteristics           |
|-----------------------------|-------------------------------------|-------------------------------------------|--------------------------------|---------------------------------------------------------------------------------------------------------------------------------------------------------------------------------------------------------------------------------------------------------------------------------------------------------------------------------------------------------------------------------------------------------------------------|--------------------|-----------------------------------|
| Hokenek, 2020 <sup>74</sup> | RCT in Turkey, 06/2019 to 10/2019   | ED                                        | Sham stimulation               | Transcutaneous electrical nerve stimulation (electrodes over supraorbital nerve), device include 27 kΩ resistance and 47 nF capacitance connected in parallel to the load, a pulse repetition frequency of 50 Hz, a pulse width of 125 μs, an impulse amplitude of 60 voltage, and a pulse energy of 18.4 μJ (±10%) on an oscilloscope, with empty battery and the device was electrically inactive), once for 20 minutes | 2 hours            | 41 Patients aged 33.62±10.2 years |

| Author, Year                   | Country, Study Design, Study Period | Study Setting (outpatient, inpatient, ED) | Intervention(s) and Comparison        | Route of Administration, Dose and Duration                                                                                                                                                                                                                                                                                                                                              | Length of Followup | Patient Characteristics                                                                                |
|--------------------------------|-------------------------------------|-------------------------------------------|---------------------------------------|-----------------------------------------------------------------------------------------------------------------------------------------------------------------------------------------------------------------------------------------------------------------------------------------------------------------------------------------------------------------------------------------|--------------------|--------------------------------------------------------------------------------------------------------|
|                                |                                     |                                           | External trigeminal nerve stimulation | Transcutaneous electrical nerve stimulation (electrodes over supraorbital nerve), device include 27 kΩ resistance and 47 nF capacitance connected in parallel to the load, a pulse repetition frequency of 50 Hz, a pulse width of 125 μs, an impulse amplitude of 60 voltage and a pulse energy of 18.4 μJ (±10%) on an oscilloscope, with fully charged battery), once for 20 minutes |                    | 42 Patients aged 35.62±8.77 years                                                                      |
| Honkaniemi, 2006 <sup>75</sup> | RCT in Finland, 01/2002 to 02/2005  | Inpatient                                 | Haloperidol                           | IV, 5 mg in 500 mL normal saline over 20-30 minutes                                                                                                                                                                                                                                                                                                                                     | 30 days            | Entire population:20 Patients (in each study group) aged 36 years, 85% female, 17% previous opioid use |
|                                |                                     |                                           | Placebo                               | IV, 500 mL normal saline over 20-30 minutes (if no relief in pain 1-3 hours after the infusion then received haloperidol as an open trial)                                                                                                                                                                                                                                              | 30 days            |                                                                                                        |
| Jones, 1994 <sup>76</sup>      | RCT in United States of America     | ED                                        | Prochlorperazine                      | Rectal, 25 mg, once                                                                                                                                                                                                                                                                                                                                                                     | 2 hours            | 10 Patients aged 30.5 ± 2.5 years, 100% female                                                         |
|                                |                                     |                                           | Placebo                               | Rectal, once                                                                                                                                                                                                                                                                                                                                                                            | 2 hours            | 10 Patients aged 28.4 ± 2.3 years, 90% female                                                          |

| Author, Year               | Country, Study Design, Study Period                 | Study Setting (outpatient, inpatient, ED) | Intervention(s) and Comparison | Route of Administration, Dose and Duration             | Length of Followup | Patient Characteristics                                                                                                                       |
|----------------------------|-----------------------------------------------------|-------------------------------------------|--------------------------------|--------------------------------------------------------|--------------------|-----------------------------------------------------------------------------------------------------------------------------------------------|
| Jones, 1996 <sup>77</sup>  | RCT in United States of America, 02/1991 to 07/1991 | ED                                        | Prochlorperazine edisylate     | IM, 10 mg, once                                        | 2 days             | 28 Patients (Prochlorperazine edisylate), 29 Patients (Metoclopramide hydrochloride), 29 Patients (Saline), aged 32.1 ± 2.1 years, 73% female |
|                            |                                                     |                                           | Metoclopramide hydrochloride   | IM, 10 mg, once                                        | 2 days             |                                                                                                                                               |
|                            |                                                     |                                           | Placebo                        | IM, 2 mL, once                                         | 2 days             |                                                                                                                                               |
| Jones, 2019 <sup>78</sup>  | RCT in United States of America, 01/2017 to 09/2017 | ED                                        | Fluid group                    | IV, 1 L of 0.9% saline solution over 1 hour            | 2 days             | 25 Patients aged 34 ± 3.75 years, 76% female, 40% White, 40% African American, 40% Hispanic                                                   |
|                            |                                                     |                                           | Control group                  | IV, 0.9% saline solution at 10 mL/hour over 1 hour     | 2 days             | 25 Patients aged 37 ± 5 years, 92% female, 42% White, 33% African American, 29% Hispanic                                                      |
| Kandil, 2020 <sup>79</sup> | RCT in USA, 08/2019 to 03/2020                      | ED                                        | Magnesium sulfate              | IV, 2 g/50 mL dextrose 5% in water, once over 20 min   | 2 hours            | 61 Patients aged 34±15.6 years, 72% female, 49% White, 41% Black, 10% Hispanic, BMI 31.2±7.7                                                  |
|                            |                                                     |                                           | Prochlorperazine               | IV, 10 mg/50 mL dextrose 5% in water, once over 20 min | 2 hours            | 52 Patients aged 37.5±15.2 years, 88% female, 27% White, 54% Black, 17% Hispanic, BMI 33.4±7.2                                                |
|                            |                                                     |                                           | Metoclopramide                 | IV, 10 mg/50 mL dextrose 5% in water, once over 20 min | 2 hours            | 44 Patients aged 37.5±13.7 years, 75% female, 52% White, 36% Black, 11% Hispanic, BMI 30.1±6.1                                                |
|                            |                                                     | Outpatient                                | Ergotamine                     | Suppositories, 2 mg, once                              | 2 days             |                                                                                                                                               |

| Author, Year                    | Country, Study Design, Study Period          | Study Setting (outpatient, inpatient, ED) | Intervention(s) and Comparison                     | Route of Administration, Dose and Duration                                                                                                                                                 | Length of Followup | Patient Characteristics                                                        |
|---------------------------------|----------------------------------------------|-------------------------------------------|----------------------------------------------------|--------------------------------------------------------------------------------------------------------------------------------------------------------------------------------------------|--------------------|--------------------------------------------------------------------------------|
| Kangasniemi, 1992 <sup>80</sup> | Crossover RCT in Finland, 01/1987 to 01/1988 |                                           | Placebo                                            | Suppositories, once                                                                                                                                                                        | 2 days             | Entire population: 52 Patients in each group aged 39 ± 10.25 years, 88% female |
| Kapicioglu, 1997 <sup>81</sup>  | RCT in Turkey                                | Outpatient                                | Octreotide                                         | Subcutaneous, 100 mg                                                                                                                                                                       | 1 day              | 17 Patients aged 39.7 years, 70.5% female                                      |
|                                 |                                              |                                           | Placebo                                            | Subcutaneous, isotonic saline                                                                                                                                                              | 1 day              | 12 Patients aged 37.11 years, 75% female                                       |
| Karimi, 2017 <sup>82</sup>      | RCT in Iran, 10/2014 to 06/2016              | ED                                        | Dexamethasone                                      | IV, 8 mg, once                                                                                                                                                                             | 1 day              | 40 Patients aged 33.4 ± 9.2 years, 85% female                                  |
|                                 |                                              |                                           | Valproate sodium                                   | IV, 400 mg (diluted into 4 mL of normal saline), once                                                                                                                                      | 1 day              | 40 Patients aged 33.9 ± 9.5 years, 77.5% female                                |
| Klapper, 1993 <sup>83</sup>     | RCT in United States of America              | Outpatient                                | Dihydroergotamine plus metoclopramide plus placebo | IV, 1 mg dihydroergotamine plus 10 mg metoclopramide, IM, placebo                                                                                                                          | 1 hour             | 14 Patients                                                                    |
|                                 |                                              |                                           | Meperidine plus hydroxyzine plus placebo           | IM, 75 mg meperidine plus 75 mg hydroxyzine, IV, placebo                                                                                                                                   | 1 hour             | 14 Patients                                                                    |
| Korucu, 2018 <sup>84</sup>      | RCT in Turkey, 01/2016 to 12/2016            | ED                                        | Greater occipital nerve blockade                   | Subcutaneous, 1 mL of 0.5% bupivacaine and 1 mL of normal saline, single injection (if the headache was on one side) or a double injection (if the headache was on both sides (total 4 mL) | 45 minutes         | 20 Patients median age 40 ± 8.9 years, 90% female                              |



| Author, Year             | Country, Study Design, Study Period                       | Study Setting (outpatient, inpatient, ED) | Intervention(s) and Comparison                           | Route of Administration, Dose and Duration                                                                                                                    | Length of Followup | Patient Characteristics                                                         |
|--------------------------|-----------------------------------------------------------|-------------------------------------------|----------------------------------------------------------|---------------------------------------------------------------------------------------------------------------------------------------------------------------|--------------------|---------------------------------------------------------------------------------|
|                          |                                                           |                                           | Dexketoprofen trometamol 50 mg plus metoclopramide 10 mg | IV, 50 mg dexketoprofen plus 10 mg metoclopramide diluted in 100ml normal saline                                                                              | 45 minutes         | 20 Patients median age 35 ± 8.14, 75% female                                    |
|                          |                                                           |                                           | Placebo                                                  | Subcutaneous, 2 mL of normal saline, single injection (if the headache was on one side) or a double injection (if the headache was on both sides (total 4 mL) | 45 minutes         | 20 Patients median age 40 ± 10.4 years, 90% female                              |
| Kuca, 2018 <sup>85</sup> | RCT in United States of America, 04/27/2015 to 08/12/2016 | Outpatient                                | Lasmiditan 200 mg                                        | Oral, 200 mg, once                                                                                                                                            | 7 days             | 745 Patients aged 41.4 ± 12 years, 84.6 % female, 73.9% White, BMI 31 ± 8.2     |
|                          |                                                           |                                           | Lasmiditan 100 mg                                        | Oral, 100 mg, once                                                                                                                                            | 7 days             | 744 Patients aged 42.2 ± 11.7 years, 81.3 % female, 74.8% White, BMI 30 ± 8     |
|                          |                                                           |                                           | Placebo                                                  | Oral, once                                                                                                                                                    | 7 days             | 742 Patients aged 42.4 ± 12.3 years, 85.1 % female, 77.6% White, BMI 30.3 ± 7.5 |
| Lane, 1989 <sup>86</sup> | RCT in Canada                                             | ED                                        | Chlorpromazine                                           | IV, 25 mg diluted to 10 mL plus 10 mL normal saline, every 15 minutes as needed up to a total of three doses                                                  | 1 hour             | 24 Patients aged 31 ± 6.5 years, 87.5% female, 75% previously used opioid       |

| Author, Year             | Country, Study Design, Study Period | Study Setting (outpatient, inpatient, ED) | Intervention(s) and Comparison | Route of Administration, Dose and Duration                                                                                                                                                   | Length of Followup | Patient Characteristics                                                           |
|--------------------------|-------------------------------------|-------------------------------------------|--------------------------------|----------------------------------------------------------------------------------------------------------------------------------------------------------------------------------------------|--------------------|-----------------------------------------------------------------------------------|
|                          |                                     |                                           | Dimenhydrinate plus meperidine | IV, 50mg dimenhydrinate diluted to 10 mL plus 100 mg meperidine diluted to 10 mL, every 15 minutes as needed up to a total of three doses                                                    | 1 hour             | 22 Patients aged 31.09 ± 7.25 years, 81.8 % female, 68.1 % previously used opioid |
| Levy, 2005 <sup>87</sup> | Crossover RCT in UK                 | Outpatient                                | Octreotide                     | Subcutaneous, 100 µg in 1 mL normal saline, once                                                                                                                                             | 2 days             | Entire population: 43 Patients aged 48 ± 12 years, female 95%                     |
|                          |                                     |                                           | Placebo                        | Subcutaneous, 1 mL normal saline, once                                                                                                                                                       | 2 days             |                                                                                   |
| Li, 2009 <sup>88</sup>   | RCT in China                        | Outpatient                                | Verum Acupuncture              | Skin by filiform Huatao needles, at the following acupoints Waiguan (TE 5), Yanglingquan (GB 34), Qiuxu (GB 40), Jiaosun (TE 20), and Fengchi (GB 20) used bilaterally. once, for 30 minutes | 1 day              | 58 Patients aged 41.84 years ± 14.21, 56.9% female                                |

| Author, Year | Country, Study Design, Study Period | Study Setting (outpatient, inpatient, ED) | Intervention(s) and Comparison | Route of Administration, Dose and Duration                                                                                                                                                                                                                                                                                                                                                                                                                                                                                      | Length of Followup | Patient Characteristics                          |
|--------------|-------------------------------------|-------------------------------------------|--------------------------------|---------------------------------------------------------------------------------------------------------------------------------------------------------------------------------------------------------------------------------------------------------------------------------------------------------------------------------------------------------------------------------------------------------------------------------------------------------------------------------------------------------------------------------|--------------------|--------------------------------------------------|
|              |                                     |                                           | Sham Acupuncture 1             | Skin by filiform Huatao needles, at nonacupoints located halfway between the triple Energizer and Small Intestine meridians lateral to the acupoints Waiguan (TE 5) horizontally; halfway between the line from Qiuxu (GB 40) to Jiexi (ST 41); halfway between the gallbladder and bladder meridians lateral to Yanglingquan (GB 34) horizontally; halfway between the line from Jiaosun (TE 20) to Shuaigu (GB 8); and halfway between the line from Fengchi (GB 20) to Anmian (extra point) bilaterally. Once for 30 minutes | 1 day              | 60 Patients aged 39.65 ± 12.83 years, 55% female |

| Author, Year               | Country, Study Design, Study Period                       | Study Setting (outpatient, inpatient, ED) | Intervention(s) and Comparison | Route of Administration, Dose and Duration                                                                                                                                                                                                                                                                                                                                                                                                                                                                                                                                                                                              | Length of Followup | Patient Characteristics                                                                             |
|----------------------------|-----------------------------------------------------------|-------------------------------------------|--------------------------------|-----------------------------------------------------------------------------------------------------------------------------------------------------------------------------------------------------------------------------------------------------------------------------------------------------------------------------------------------------------------------------------------------------------------------------------------------------------------------------------------------------------------------------------------------------------------------------------------------------------------------------------------|--------------------|-----------------------------------------------------------------------------------------------------|
|                            |                                                           |                                           | Sham Acupuncture 2             | Skin by filiform Huatao needles, at nonacupoints located medial arm on the anterior border of the insertion of the deltoid muscle at the junction of the deltoid and biceps muscles; the inside of the mid-thigh region 2 cm lateral to half the distance from the anterior superior iliac spine to the lateral superior corner of the patella on the rectus femoris;13 the edge of the tibia 1 to 2 cm lateral to the Zusanli (ST 36) point horizontally; halfway between the tip of the elbow and the axillae and halfway between the epicondylus medialis of the humerus and ulnar side of the wrist bilaterally.once for 30 minutes | 1 day              | 57 Patients aged 39.49 ± 11.6 years, 70.2% female                                                   |
| Lipton, 2000 <sup>89</sup> | RCT in United Stated of America, 03/11/1998 to 08/10/1998 | Outpatient                                | Acetaminophen                  | Oral, 1000 mg, once                                                                                                                                                                                                                                                                                                                                                                                                                                                                                                                                                                                                                     | 6 hours            | 176 Patients aged 37.3 ± 10.4 years, 76.9% female, 23.8% African American, 75.5% White, 0.7% others |

| Author, Year               | Country, Study Design, Study Period                                   | Study Setting (outpatient, inpatient, ED) | Intervention(s) and Comparison                        | Route of Administration, Dose and Duration                                                                                                                                                                                                        | Length of Followup | Patient Characteristics                                                                                                                          |
|----------------------------|-----------------------------------------------------------------------|-------------------------------------------|-------------------------------------------------------|---------------------------------------------------------------------------------------------------------------------------------------------------------------------------------------------------------------------------------------------------|--------------------|--------------------------------------------------------------------------------------------------------------------------------------------------|
|                            |                                                                       |                                           | Placebo                                               | Oral, once                                                                                                                                                                                                                                        | 6 hours            | 175 Patients aged 36 ± 9.3 years, 83.1% female, 28.9% African American, 69.7% white, 1.4% others                                                 |
| Lipton, 2010 <sup>90</sup> | RCT (non-inferiority) in United States of America, 08/2006 to 02/2008 | Outpatient                                | Single-pulse transcranial magnetic stimulation (sTMS) | Transcranial (below the occipital bone), pulse of nominally 0.9 T peak (measured 1 cm from the device surface) with a rise time of roughly 180 μs and a total pulse length of less than 1 ms, two pulses about 30 s apart (treat up to 3 attacks) | 90 days            | 102 Patients aged 38.8 ± 11.2 years, 82% female                                                                                                  |
|                            |                                                                       |                                           | Sham stimulation                                      | Transcranial (below the occipital bone), two pulses about 30 s apart (treat up to 3 attacks)                                                                                                                                                      | 90 days            | 99 Patients aged 40.1 ± 10.8 years, 77% female                                                                                                   |
| Lipton, 2019 <sup>91</sup> | RCT in United States of America, 07/2017 to 01/2018                   | Outpatient                                | Rimegepant                                            | Oral, 75 mg, once                                                                                                                                                                                                                                 | 7 days             | 594 Patients aged 40.2 ± 11.9 years, 89.2% female, 20.7% African American, 73.4% White, 1.5% Asian, 14.3% Hispanic, 4.47% others, BMI 31.0 ± 7.9 |
|                            |                                                                       |                                           | Placebo                                               | Oral, once                                                                                                                                                                                                                                        | 7 days             | 592 Patients aged 40.9 ± 12.1 years, 88.2% female, 22.1% African American, 74.6% White, 1.5% Asian, 15.5% Hispanic, 1.8% others, BMI 31.8 ± 8.5  |

| Author, Year               | Country, Study Design, Study Period                       | Study Setting (outpatient, inpatient, ED) | Intervention(s) and Comparison | Route of Administration, Dose and Duration                       | Length of Followup | Patient Characteristics                                                                                                                                                                                                                                      |
|----------------------------|-----------------------------------------------------------|-------------------------------------------|--------------------------------|------------------------------------------------------------------|--------------------|--------------------------------------------------------------------------------------------------------------------------------------------------------------------------------------------------------------------------------------------------------------|
| Lipton, 2019 <sup>92</sup> | RCT in United States of America, 08/26/2016 to 02/26/2018 | Outpatient                                | Ubrogapant 50 mg               | Oral, 50 mg, once within 4 hours of a qualifying migraine attack | 42 days            | 562 Patients aged 41.2±12.5 years, 91% female, 16.8% African American, 81.6% White, 0.4% Asian, 21.9% Hispanic, 0.4% American Indian or Alaska Native, 0.2% Native Hawaiian or other Pacific Islander, 0.6% multiple, BMI 30.5±7.5, 3.9% previous opioid use |
|                            |                                                           |                                           | Ubrogapant 25 mg               | Oral, 25 mg, once within 4 hours of a qualifying migraine attack | 42 days            | 561 Patients aged 41.6±12.4 years, 90.2% female, 14% African American, 83.5% White, 1.3% Asian, 23% Hispanic, 0.2% American Indian or Alaska Native, 0.2% Native Hawaiian or other Pacific Islander, 0.8% multiple, BMI 29.6±7, 3.6 % previous opioid use    |

| Author, Year                | Country, Study Design, Study Period                 | Study Setting (outpatient, inpatient, ED) | Intervention(s) and Comparison | Route of Administration, Dose and Duration                                                                                                                           | Length of Followup                   | Patient Characteristics                                                                                                                                                                                                                                      |
|-----------------------------|-----------------------------------------------------|-------------------------------------------|--------------------------------|----------------------------------------------------------------------------------------------------------------------------------------------------------------------|--------------------------------------|--------------------------------------------------------------------------------------------------------------------------------------------------------------------------------------------------------------------------------------------------------------|
|                             |                                                     |                                           | Placebo                        | Oral, once within 4 hours of a qualifying migraine attack                                                                                                            | 42 days                              | 563 Patients aged 41.7±12.1 years, 88.6% female, 16.4% African American, 80% White, 1.4% Asian, 19.8% Hispanic, 0.6% American Indian or Alaska Native, 0.2% Native Hawaiian or other Pacific Islander, 1.4% multiple, BMI 29.8±7.7, 3.8% previous opioid use |
| Maizels, 1996 <sup>93</sup> | RCT in United States of America, 12/1994 to 10/1995 | Urgent Care                               | Lidocaine                      | Intranasal, 0.5 mL of 4% lidocaine topical solution dripped in one nostril over 30 seconds (1 mL in case the headache is bilateral dripped over 1 minute), 1-2 times | 1 day                                | 53 Patients median age 43 ± 11.9 years, 87% female                                                                                                                                                                                                           |
|                             |                                                     |                                           | Placebo                        | Intranasal, 0.5 mL, normal saline dripped in one nostril over 30 seconds (1 mL in case the headache is bilateral dripped over 1 minute), 1-2 times                   | 1 day                                | 28 Patients median age 40 ± 11.5 years, 75% female                                                                                                                                                                                                           |
| Maizels, 1999 <sup>94</sup> | RCT in United States of America, 01/1997 to 01/1998 | Outpatient                                | Lidocaine                      | Intranasal, 0.5 mL of 4% lidocaine topical solution dripped in one nostril over 30 seconds (1 mL in case the headache is bilateral dripped over 1 minute), 1-2 times | 30 days (RCT), 180 days (open label) | 66 Patients aged 44.5 ± 9.1 years, 83.1% female                                                                                                                                                                                                              |

| Author, Year               | Country, Study Design, Study Period                 | Study Setting (outpatient, inpatient, ED) | Intervention(s) and Comparison                              | Route of Administration, Dose and Duration                                                                                                         | Length of Followup                   | Patient Characteristics                                                                      |
|----------------------------|-----------------------------------------------------|-------------------------------------------|-------------------------------------------------------------|----------------------------------------------------------------------------------------------------------------------------------------------------|--------------------------------------|----------------------------------------------------------------------------------------------|
|                            |                                                     |                                           | Placebo                                                     | Intranasal, 0.5 mL, normal saline dripped in one nostril over 30 seconds (1 mL in case the headache is bilateral dripped over 1 minute), 1-2 times | 30 days (RCT), 180 days (open label) | 65 Patients aged 47 ± 10.2 years, 87.9% female                                               |
| Marcus, 2008 <sup>95</sup> | RCT in United States of America                     | ED                                        | Integrated EMDR (eye movement desensitization reprocessing) | Behavioral intervention, Participant's use of diaphragmatic breathing coupled with head compression by the provider, once for 12-60 minutes        | 7 days                               | 26 Patients aged 38.33 ± 10.57 years, 95.2% female, 30% White                                |
|                            |                                                     |                                           | Usual Care                                                  | Variable interventions (oral / injection; depending on drug type), Variable dosage depends on the drug, once                                       | 7 days                               | 26 Patients aged 37.95 ± 9.57 years, 95.5% female, 68.2% White                               |
| Marcus, 2014 <sup>96</sup> | RCT in United States of America, 10/2011 to 05/2012 | Outpatient                                | Placebo                                                     | Oral, once                                                                                                                                         | 7 days                               | 229 Patients aged 37.9 ± 11.36 years, 86% female, 12% African American, 84% White, 3% others |
|                            |                                                     |                                           | Rimegepant 10 mg                                            | Oral, 10 mg, once                                                                                                                                  | 7 days                               | 85 Patients aged 41.1 ± 10.36 years, 79% female, 14% African American, 79% White, 7% others  |
|                            |                                                     |                                           | Rimegepant 25 mg                                            | Oral, 25 mg, once                                                                                                                                  | 7 days                               | 68 Patients aged 36.5 ± 11.92 years, 90% female, 10% African American, 87% White, 3% others  |



| Author, Year                 | Country, Study Design, Study Period        | Study Setting (outpatient, inpatient, ED) | Intervention(s) and Comparison | Route of Administration, Dose and Duration                                                                           | Length of Followup | Patient Characteristics                                                                      |
|------------------------------|--------------------------------------------|-------------------------------------------|--------------------------------|----------------------------------------------------------------------------------------------------------------------|--------------------|----------------------------------------------------------------------------------------------|
|                              |                                            |                                           | Rimegepant 75 mg               | Oral, 75 mg, once                                                                                                    | 7 days             | 91 Patients aged 38.5 ± 11.87 years, 89% female, 7% African American, 90% White, 3% others   |
|                              |                                            |                                           | Rimegepant 150 mg              | Oral, 150 mg, once                                                                                                   | 7 days             | 90 Patients aged 39.2 ± 11.26 years, 70% female, 20% African American, 72% White, 8% others  |
|                              |                                            |                                           | Rimegepant 300 mg              | Oral, 300 mg, once                                                                                                   | 7 days             | 121 Patients aged 41.9 ± 11.46 years, 84% female, 13% African American, 84% White, 1% others |
|                              |                                            |                                           | Rimegepant 600 mg              | Oral, 600 mg, once                                                                                                   | 7 days             | 92 Patients aged 39.3 ± 13.01 years, 83% female, 11% African American, 87% White, 2% others  |
| Mazaheri, 2015 <sup>97</sup> | RCT in Iran, 04/2012 to 06/2014            | ED                                        | Valproate Sodium               | IV, 400 mg (plus 50 mL saline normal solution) for 15 minutes, once                                                  | 2 hours            | 43 Patients aged 37.29 ± 11.7 years, 82.9% female                                            |
|                              |                                            |                                           | Dexamethasone                  | IV, 16 mg (plus 50 mL saline normal solution) for 15 minutes, once                                                   | 2 hours            | 43 Patients aged 32.05 ± 9.1 years, 81.1% female                                             |
| McEwen, 1987 <sup>98</sup>   | RCT in Canada, 03/1985 to 11/1985          | ED                                        | Chlorpromazine                 | IM, 50 mg/2mL (1 mg/kg), once                                                                                        | 1 day              | 19 Patients aged 30 years, 94.7% female                                                      |
|                              |                                            |                                           | Normal saline                  | IM, 2 mL, normal saline, once                                                                                        | 1 day              | 17 Patients aged 36 years, 88.2% female                                                      |
| Meek, 2020 <sup>99</sup>     | RCT in Australia, 03/01/2016 to 10/31/2018 | ED                                        | Propofol                       | IV, Maximum dose 140 mg over 40 min (Initial dose of 40 mg followed by up to five doses of 20 mg, over 5 min a part) | 2 days             | 21 Patients, aged 35±9.6 years, 81% female                                                   |

| Author, Year                 | Country, Study Design, Study Period                 | Study Setting (outpatient, inpatient, ED) | Intervention(s) and Comparison                                                                              | Route of Administration, Dose and Duration                                                                                          | Length of Followup | Patient Characteristics                                                                        |
|------------------------------|-----------------------------------------------------|-------------------------------------------|-------------------------------------------------------------------------------------------------------------|-------------------------------------------------------------------------------------------------------------------------------------|--------------------|------------------------------------------------------------------------------------------------|
|                              |                                                     |                                           | Placebo                                                                                                     | IV, maximum dose 14 ml (20% Intralipid), over 40 min (Initial dose of 4 ml followed by up to five doses of 2 ml, over 5 min a part) | 2 days             | 19 Patients, aged 35±11.9 years, 84% female                                                    |
| Miller, 2009 <sup>100</sup>  | RCT in United States of America, 02/2006 to 02/2007 | ED                                        | Prochlorperazine                                                                                            | IV, 10 mg once for 2 minutes                                                                                                        | 3 days             | 20 Patients aged 27.5 ± 5.8 years, 70% female                                                  |
|                              |                                                     |                                           | Octreotide                                                                                                  | IV, 100 µg, once for 2 minutes                                                                                                      | 3 days             | 24 Patients aged 31.1 ± 11.1 years, 78% female                                                 |
| Mitra, 2020 <sup>101</sup>   | RCT in Australia                                    | ED                                        | Propofol                                                                                                    | IV, 1 mg/kg, slowly for 1 min                                                                                                       | N/A                | 15 Patients aged 32.9±10.3 years, 47% female                                                   |
|                              |                                                     |                                           | Standard therapy (chlorpromazine, metoclopramide, ondansetron, lignocaine, magnesium sulphate, or morphine) | N/A                                                                                                                                 | N/A                | 15 Patients aged 37.9±9.4 years, 89% female.                                                   |
| Molaie, 1987 <sup>102</sup>  | RCT in United States of America                     | ED                                        | Verapamil hydrochloride                                                                                     | IV, 2 cc (10 mg), once                                                                                                              | 1 hour             | 6 Patients (verapamil hydrochloride), 6 Patients (placebo), aged 33.75 ± 8.3 years, 50% female |
|                              |                                                     |                                           | Placebo                                                                                                     | IV, 2 cc, once                                                                                                                      | 1 hour             |                                                                                                |
| Motamed, 2020 <sup>103</sup> | RCT in Iran, 10/2017 to 11/2018                     | ED                                        | Metoclopramide plus Magnesium sulphate                                                                      | IV, 2 g magnesium sulfate plus 10 mg metoclopramide once                                                                            | 45 minutes         | 40 Patients aged 20-30 (12.5%), 31-40 (52.5%), >40 (35%) years, 50% female                     |

| Author, Year                         | Country, Study Design, Study Period                 | Study Setting (outpatient, inpatient, ED) | Intervention(s) and Comparison | Route of Administration, Dose and Duration                                                       | Length of Followup | Patient Characteristics                                                    |
|--------------------------------------|-----------------------------------------------------|-------------------------------------------|--------------------------------|--------------------------------------------------------------------------------------------------|--------------------|----------------------------------------------------------------------------|
|                                      |                                                     |                                           | Metoclopramide plus placebo    | IV, 10 mg metoclopramide plus placebo once                                                       | 45 minutes         | 40 Patients aged 20-30 (22.5%), 31-40 (42.5%), >40 (35%) years, 50% female |
| Niazi, 2007 <sup>104</sup>           | Crossover RCT in Iran                               | Outpatient                                | Rose damascene oil             | Skin, 2 cc of the rose damascene oil on forehead and temporal zones at onset of migraine attacks | 1 day              | Entire population: 40 Patients aged 34.89 ± 10.81 years, BMI 25.50 ± 4.77  |
|                                      |                                                     |                                           | Placebo                        | Skin, 2 cc of the paraffin oil forehead and temporal zones at the onset of migraine attacks      | 1 day              |                                                                            |
| Prior, 2010 <sup>105</sup>           | RCT in United States of America, 02/1999 to 06/1999 | Outpatient                                | Acetaminophen                  | Oral, 1000 mg, once                                                                              | 3 days             | 190 Patients aged 38.1 ± 11 years, 80.8% female, 87% White                 |
|                                      |                                                     |                                           | Placebo                        | Oral, placebo, once                                                                              | 3 days             | 188 Patients aged 39.8 ± 11.8 years, 85.8% female, 85.8% White             |
| Rafieian-Kopaei, 2019 <sup>106</sup> | RCT in Iran                                         | Outpatient                                | Lidocaine                      | Intranasal, 4%, once-twice                                                                       | 60 days            | 41 Patients aged 30.6 ± 6.3 years, 76.3% female                            |
|                                      |                                                     |                                           | Peppermint essential oil       | Intranasal, 1.5%, once-twice                                                                     | 60 days            | 38 Patients aged 30.42 ± 7.2 years, 76.3.6% female                         |
|                                      |                                                     |                                           | Placebo                        | Intranasal, once-twice                                                                           | 60 days            | 41 Patients aged 31.8 ± 5.8 years, 68.3% female                            |
| Rapoport, 1995 <sup>107</sup>        | RCT in the United States of America                 | Outpatient                                | Dihydroergotamine              | Intranasal, 2 mg in 0.5 mL, divided into 2 sprays delivered in 15 minutes interval               | 4 hours            | 114 Patients (Dihydroergotamine), 115 Patients (Placebo), age              |

| Author, Year                 | Country, Study Design, Study Period       | Study Setting (outpatient, inpatient, ED) | Intervention(s) and Comparison      | Route of Administration, Dose and Duration                                                                                                                                                                  | Length of Followup | Patient Characteristics                                            |
|------------------------------|-------------------------------------------|-------------------------------------------|-------------------------------------|-------------------------------------------------------------------------------------------------------------------------------------------------------------------------------------------------------------|--------------------|--------------------------------------------------------------------|
|                              |                                           |                                           | Placebo                             | Intranasal, 0.5 mL, divided into 2 sprays delivered in 15 minutes interval                                                                                                                                  | 4 hours            | range 18-62, 70% female<br>0% White                                |
| Reutens, 1991 <sup>108</sup> | RCT in Australia, 04/1989 to 12/1989      | ED                                        | Lidocaine                           | IV, 66 mg, once for 2 minutes                                                                                                                                                                               | 20 minutes         | 13 Patients aged 40 years, 92% female                              |
|                              |                                           |                                           | Placebo                             | IV, once for 2 minutes                                                                                                                                                                                      | 20 minutes         | 12 Patients aged 30 years, 67% female                              |
| Richman, 2002 <sup>109</sup> | RCT in United States of America           | ED                                        | Droperidol                          | IM, 2.5 mg, once                                                                                                                                                                                            | 0.5 hour           | 15 Patients aged 30.7 ± 8.9 years, 73% female                      |
|                              |                                           |                                           | Meperidine                          | IM, 1.5 mg/ kg, once                                                                                                                                                                                        | 0.5 hour           | 14 Patients aged 32.7 ± 9.9 years, 71% female                      |
| Rowat, 1991 <sup>110</sup>   | RCT in Canada                             | ED                                        | Granisetron 40 µg/kg                | IV, 20 mL (1000 µg/ mL diluted in 0.9% saline), once for 3 minutes                                                                                                                                          | 3 ±1 days          | 10 Patients aged 39.5 ± 11.8 years, 50% female, weight 72.4 ± 11.7 |
|                              |                                           |                                           | Granisetron 80 µg/kg                | IV, 20 mL (2000 µg/ mL diluted in 0.9% saline), once for 3 minutes                                                                                                                                          | 3 ±1 days          | 10 Patients aged 38.2 ± 13.8 years, 80% female, weight 59.8 ± 9.2  |
|                              |                                           |                                           | Placebo                             | IV, once for 3 minutes                                                                                                                                                                                      | 3 ±1 days          | 8 Patients aged 41.3 ± 8.6 years, 87.5% female, weight 63.1 ± 11.9 |
| Ryan, 1970 <sup>111</sup>    | Crossover RCT in United States of America | Outpatient                                | Ergostine 1 mg plus caffeine 100 mg | Oral, 1 mg ergostine plus 100 mg caffeine, medication was taken at first sign of headache (2 tablets) followed by 1 tablet every ½ hour until attack was aborted or a maximum of six tablets had been taken | 1 day              | Entire population: 48 Patients aged 46 ± 12.25 years, 68.7% female |

| Author, Year                  | Country, Study Design, Study Period | Study Setting (outpatient, inpatient, ED) | Intervention(s) and Comparison                | Route of Administration, Dose and Duration                                                                                                                                                                            | Length of Followup | Patient Characteristics                                                                                                              |
|-------------------------------|-------------------------------------|-------------------------------------------|-----------------------------------------------|-----------------------------------------------------------------------------------------------------------------------------------------------------------------------------------------------------------------------|--------------------|--------------------------------------------------------------------------------------------------------------------------------------|
|                               |                                     |                                           | Ergotamine tartrate 1 mg plus caffeine 100 mg | Oral, 1 mg ergotamine tartrate plus 100 mg caffeine, medication was taken at first sign of headache (2 tablets) followed by 1 tablet every ½ hour until attack was aborted or a maximum of six tablets had been taken | 1 day              |                                                                                                                                      |
|                               |                                     |                                           | Placebo                                       | Oral, medication was taken at first sign of headache (2 tablets) followed by 1 tablet every ½ hour until attack was aborted or a maximum of six tablets had been taken                                                | 1 day              |                                                                                                                                      |
| Salazar, 2011 <sup>112</sup>  | RCT in Spain, 01/2007 to 03/2009    | ED                                        | Metoclopramide                                | IV, 10 mg diluted in 100 cc of saline, once                                                                                                                                                                           | 2 days             | 43 Patients aged 35 years, 53.48% female                                                                                             |
|                               |                                     |                                           | Paracetamol                                   | IV, 1g diluted in 100 mL of saline, once                                                                                                                                                                              | 2 days             | 45 Patients aged 42 years, 51.11% female                                                                                             |
| Scherl, 1995 <sup>113</sup>   | RCT in United States of America     | Outpatient                                | Dihydroergotamine plus metoclopramide         | IV, 0.5 mg dihydroergotamine with 10 mg metoclopramide, once                                                                                                                                                          | 1 day              | 14 Patients (dihydroergotamine plus metoclopramide), 13 patients (meperidine plus promethazine), aged 30.6 ± 7.6 years, 70.4% female |
|                               |                                     |                                           | Meperidine plus promethazine                  | IM, 75 mg meperidine with 25 mg promethazine, once                                                                                                                                                                    | 1 day              |                                                                                                                                      |
| Shahrami, 2015 <sup>114</sup> | RCT in Iran, 2011                   | ED                                        | Dexamethasone plus metoclopramide             | IV, 8 mg dexamethasone and 10 mg metoclopramide in 100 mL normal saline solution, once for 15 minutes                                                                                                                 | 2 hours            | 35 Patients aged 38 ± 11.2 years, 60% female                                                                                         |

| Author, Year                     | Country, Study Design, Study Period                       | Study Setting (outpatient, inpatient, ED) | Intervention(s) and Comparison    | Route of Administration, Dose and Duration                | Length of Followup | Patient Characteristics                                                                            |
|----------------------------------|-----------------------------------------------------------|-------------------------------------------|-----------------------------------|-----------------------------------------------------------|--------------------|----------------------------------------------------------------------------------------------------|
|                                  |                                                           |                                           | Magnesium sulfate                 | IV, 1 g in 100 mL normal saline, once for 15 minutes      | 2 hours            | 35 Patients aged 36 ± 12.6 years, 45.7% female                                                     |
| Sharma, 2002 <sup>115</sup>      | RCT in India                                              | Outpatient                                | Buccal prochlorperazine           | Oral, 3 mg, once                                          | N/A                | Entire population: 45 Patients aged 18 to 50 years, 62.2% female                                   |
|                                  |                                                           |                                           | Buccal placebo                    | Oral, once                                                | N/A                |                                                                                                    |
|                                  |                                                           |                                           | Ergotamine tartrate plus caffeine | Oral, 1 mg ergotamine tartrate plus 100 mg caffeine, once | N/A                |                                                                                                    |
| Silberstein, 2005 <sup>116</sup> | RCT in United States of America                           | Outpatient                                | Acetaminophen plus tramadol       | Oral, 75 mg/650 mg, once                                  | 1 day              | 188 Patients aged 39.2 ± 11.29 years, 87% female, 83.8% White, 10.4% Black, 1.3% Asian, 4.5% Other |
|                                  |                                                           |                                           | Placebo                           | Oral, once                                                | 1 day              | 187 Patients aged 39.1 ± 10.47 years, 83.4% female, 87.6% White, 6% Black, 2% Asian, 4.6% Other    |
| Silberstein, 2003 <sup>117</sup> | RCT in United States of America, 12/19/1997 to 06/15/1998 | Outpatient                                | Droperidol 0.1 mg                 | IM, 0.1 mg, once                                          | 7 days             | 63 Patients aged 42 ± 10.5 years, 81% female                                                       |
|                                  |                                                           |                                           | Droperidol 2.75 mg                | IM, 2.75 mg, once                                         | 7 days             | 61 Patients aged 41 ± 9.1 years, 80% female                                                        |
|                                  |                                                           |                                           | Droperidol 5.5 mg                 | IM, 5.5 mg, once                                          | 7 days             | 59 Patients aged 41 ± 10.8 years, 81% female                                                       |
|                                  |                                                           |                                           | Droperidol 8.25 mg                | IM, 8.25 mg, once                                         | 7 days             | 61 Patients aged 42 ± 10 years, 77% female                                                         |
|                                  |                                                           |                                           | Placebo                           | IM, once                                                  | 7 days             | 61 Patients aged 41 ± 9.7 years, 85% female                                                        |

| Author, Year                      | Country, Study Design, Study Period                 | Study Setting (outpatient, inpatient, ED) | Intervention(s) and Comparison | Route of Administration, Dose and Duration                                               | Length of Followup | Patient Characteristics                             |
|-----------------------------------|-----------------------------------------------------|-------------------------------------------|--------------------------------|------------------------------------------------------------------------------------------|--------------------|-----------------------------------------------------|
| Soleimanpour, 2012 <sup>118</sup> | RCT in Iran                                         | ED                                        | Propofol                       | IV, 10 mg, every 5-10 minutes (maximum dose of 80 mg), rate of 1 mL for 10 seconds       | N/A                | 45 Patients aged 35.65 ± 12.55 years, 66.6% female  |
|                                   |                                                     |                                           | Dexamethasone                  | IV, 4 mg/mL with dose of 0.15 mg/kg (maximum dose of 16 mg), rate of 1 mL for 10 seconds | N/A                | 45 Patients aged 36.27 ± 13.38 years, 62.22% female |
| Stiell, 1991 <sup>119</sup>       | RCT in Canada, 02/1990 to 09/1990                   | ED                                        | Methotrimeprazine              | IM, 37.5 mg, once                                                                        | 2 days             | 37 Patients aged 30.9±7.3 years, 67.6% female       |
|                                   |                                                     |                                           | Meperidine plus dimenhydrinate | IM, 75 mg meperidine with 50 mg dimenhydrinate, once                                     | 2 days             | 37 Patients aged 32.5±8.9 years, 83.8% female       |
| Taheraghdam, 2011 <sup>120</sup>  | RCT in Iran, 09/2008 to 05/2009                     | ED                                        | Dexamethasone                  | IV, 8 mg, once                                                                           | 1 day              | 93 Patients aged 45.93±16.1 years, 55.9% female     |
|                                   |                                                     |                                           | Morphine                       | IV, 0.1 mg/kg, once                                                                      | 1 day              | 97 Patients aged 42.34±16.2 years, 67% female       |
| Tanen, 2003 <sup>121</sup>        | RCT in United States of America, 01/2002 to 08/2002 | ED                                        | Sodium valproate               | IV, 500 mg, once for 2 minutes                                                           | 0.5 days           | 20 Patients aged 31±9.3, 58% female                 |
|                                   |                                                     |                                           | Prochlorperazine               | IV, 10 mg, once for 2 minutes                                                            | 0.5 days           | 20 Patients aged 38.8±11, 79.2% female              |

| Author, Year                    | Country, Study Design, Study Period                 | Study Setting (outpatient, inpatient, ED) | Intervention(s) and Comparison      | Route of Administration, Dose and Duration                                                                                                                                                                                                                                | Length of Followup | Patient Characteristics                                          |
|---------------------------------|-----------------------------------------------------|-------------------------------------------|-------------------------------------|---------------------------------------------------------------------------------------------------------------------------------------------------------------------------------------------------------------------------------------------------------------------------|--------------------|------------------------------------------------------------------|
| Tassorelli, 2018 <sup>122</sup> | RCT in Italy, 01/11/2016 to 03/31/2017              | Outpatient                                | Noninvasive vagus nerve stimulation | Transdermal, a low-voltage electrical signal comprising a 5-kHz sine wave burst lasting for 1 ms (5 sine waves, each lasting 200 $\mu$ s), with such bursts repeated once every 40 ms (25 Hz), generating a 24-V peak voltage and 60-mA peak output current for 2 minutes | 5 days             | 122 Patients aged 38.8 $\pm$ 11 years, 79.24% female, 100% White |
|                                 |                                                     |                                           | Sham stimulation                    | Transdermal, a low-frequency (0.1 Hz) biphasic signal for 2 minutes                                                                                                                                                                                                       | 5 days             | 126 Patients aged 39.6 $\pm$ 11.8 years, 30% female, 100% White  |
| Tek, 1990 <sup>123</sup>        | RCT in United States of America, 08/1987 to 04/1988 | ED                                        | Metoclopramide                      | IV, 10 mg, once                                                                                                                                                                                                                                                           | 2 days             | 24 Patients age range 18-60                                      |
|                                 |                                                     |                                           | Placebo                             | IV, 2 mL, once                                                                                                                                                                                                                                                            | 2 days             | 26 Patients age range 18-60                                      |
| Treves, 1998 <sup>124</sup>     | RCT in Brazil                                       | Outpatient                                | Dihydroergotamine 1 mg              | Intranasal, 1 mg, 2 to 4 times                                                                                                                                                                                                                                            | N/A                | 19 Patients aged 33.3 $\pm$ 12.3 years, 78.9% female             |
|                                 |                                                     |                                           | Dihydroergotamine 0.5 mg            | Intranasal, 0.5 mg, 2 to 4 times                                                                                                                                                                                                                                          | N/A                | 17 Patients aged 33.7 $\pm$ 10 years, 41.2% female               |
|                                 |                                                     |                                           | Placebo                             | Intranasal, 2 to 4 times                                                                                                                                                                                                                                                  | N/A                | 16 Patients aged 34.8 $\pm$ 13.7 years, 62.5% female             |
| Triner, 1999 <sup>125</sup>     | RCT in United States of America,                    | ED                                        | Nitrous oxide plus oxygen           | Inhalation, 50% (NO) 50% Oxygen, once for 20 minutes                                                                                                                                                                                                                      | 0.5 days           | 10 Patients aged 34.5 $\pm$ 11.8 years, 80% female, 70% White    |



| Author, Year                 | Country, Study Design, Study Period | Study Setting (outpatient, inpatient, ED) | Intervention(s) and Comparison | Route of Administration, Dose and Duration                                                            | Length of Followup | Patient Characteristics                                         |
|------------------------------|-------------------------------------|-------------------------------------------|--------------------------------|-------------------------------------------------------------------------------------------------------|--------------------|-----------------------------------------------------------------|
|                              | 07/10/1995 to 11/30/1995            |                                           | Oxygen                         | Inhalation, 100% Oxygen, once for 20 minutes                                                          | 0.5 days           | 12 Patients aged 28.1 ± 5.5 years, 91.6% female, 80% White      |
| Tulunay, 1987 <sup>126</sup> | Crossover RCT in Turkey             | Outpatient                                | Dihydroergotamine              | Intranasal (Puff), 4 mg/mL of DHE in an aqueous solution of 1 % caffeine and 5% glucose, 2 to 3 times | 0.5 days           | 17 Patients aged 26.1 ± 3.34 years, 58.6% female                |
|                              |                                     |                                           | Placebo                        | Intranasal (Puff), 2 to 3 times                                                                       | 0.5 days           |                                                                 |
| Voss, 2016 <sup>127</sup>    | RCT in United States of America     | Outpatient                                | Ubrogepant 1 mg                | Oral, 1 mg, once                                                                                      | 14 days            | 138 Patients aged 39.6 ± 10.7 years, 88.8% female, BMI 29.4±7.3 |
|                              |                                     |                                           | Ubrogepant 10 mg               | Oral, 10 mg, once                                                                                     | 14 days            | 139 Patients aged 41.1 ± 10.9 years, 85.2% female, 29.6±7.1     |
|                              |                                     |                                           | Placebo                        | Oral, once                                                                                            | 14 days            | 139Patients aged 40.5 ± 11.7 years, 87.65% female, BMI 28.5±7   |
|                              |                                     |                                           | Ubrogepant 25 mg               | Oral, 25 mg, once                                                                                     | 14 days            | 139 Patients aged 41.4 ± 11.5 years, 86.8% female, BMI 29.2±8.1 |
|                              |                                     |                                           | Ubrogepant 50 mg               | Oral, 50 mg, once                                                                                     | 14 days            | 139 Patients aged 40.7 ± 12.3 years, 88.2% female, BMI 27.8±8.1 |
|                              |                                     |                                           | Ubrogepant 100 mg              | Oral, 100 mg, once                                                                                    | 14 days            | 140 Patients aged 41.9 ± 11 years, 83.3% female, BMI 29.2±7     |
| Wang, 2012 <sup>128</sup>    |                                     | Outpatient                                | Verum Acupuncture              | Skin, once for 30 minutes                                                                             | 3 days             | 75 Patients aged 37.8 ± 10.6 years, 89.3% female                |

| Author, Year                   | Country, Study Design, Study Period               | Study Setting (outpatient, inpatient, ED) | Intervention(s) and Comparison                           | Route of Administration, Dose and Duration                                                                                                                                                                                                        | Length of Followup | Patient Characteristics                                            |
|--------------------------------|---------------------------------------------------|-------------------------------------------|----------------------------------------------------------|---------------------------------------------------------------------------------------------------------------------------------------------------------------------------------------------------------------------------------------------------|--------------------|--------------------------------------------------------------------|
|                                | RCT in China<br>03/2007 to<br>02/2009             |                                           | Sham Acupuncture                                         | Skin, once for 30 minutes                                                                                                                                                                                                                         | 3 days             | 75 Patients aged 38.6 ± 12.6 years, 84% female                     |
| Yang, 2012 <sup>129</sup>      | RCT in China,<br>07/2008 to<br>09/2009            | Outpatient                                | Traditional acupuncture group                            | Received specific stimulation of traditional acupoints by electroacupuncture treatment (EAT) for 30 minutes, stimulation frequency was 2/100 Hz, and the stimulation intensity varied from 0.1 to 1.0 mA as long as the patients felt comfortable | 1 hour             | Entire population: 30 Patients aged 32.87 ± 8.71 years, 60% female |
|                                |                                                   |                                           | Sham acupuncture group                                   | Received nonspecific stimulation by electroacupuncture treatment (EAT) for 30 minutes, stimulation frequency was 2/100 Hz, and the stimulation intensity varied from 0.1 to 1.0 mA as long as the patients felt comfortable                       | 1 hour             |                                                                    |
|                                |                                                   |                                           | No treatment                                             | Received no treatment                                                                                                                                                                                                                             | 1 hour             |                                                                    |
| Yarnitsky, 2017 <sup>130</sup> | Crossover RCT in Israel,<br>06/2015 to<br>03/2016 | Outpatient                                | Active remote electrical stimulation (pulse width 50 µs) | Transcutaneously, at 80-120 Hz frequency, with pulse width of 50 µs for 20 minutes                                                                                                                                                                | 60 days            | Entire population: 86 Patients aged 45.9 ± 11.7 years, 80% female  |

| Author, Year                   | Country, Study Design, Study Period                               | Study Setting (outpatient, inpatient, ED) | Intervention(s) and Comparison                                 | Route of Administration, Dose and Duration                                               | Length of Followup | Patient Characteristics                                           |
|--------------------------------|-------------------------------------------------------------------|-------------------------------------------|----------------------------------------------------------------|------------------------------------------------------------------------------------------|--------------------|-------------------------------------------------------------------|
|                                |                                                                   |                                           | Active remote electrical stimulation (pulse width 100 $\mu$ s) | Transcutaneously, at 80-120 Hz frequency, with pulse width of 100 $\mu$ s for 20 minutes | 60 days            |                                                                   |
|                                |                                                                   |                                           | Active remote electrical stimulation (pulse width 150 $\mu$ s) | Transcutaneously, at 80-120 Hz frequency, with pulse width of 150 $\mu$ s for 20 minutes | 60 days            |                                                                   |
|                                |                                                                   |                                           | Active remote electrical stimulation (pulse width 200 $\mu$ s) | Transcutaneously, at 80-120 Hz frequency, with pulse width of 200 $\mu$ s for 20 minutes | 60 days            |                                                                   |
|                                |                                                                   |                                           | Sham remote electrical stimulation                             | Transcutaneously, at 0.1 Hz frequency, with pulse width of 45 $\mu$ s for 20 minutes     | 60 days            |                                                                   |
| Yarnitsky, 2019 <sup>131</sup> | RCT in United States of America, Israel, 12/17/2017 to 10/07/2018 | Outpatient                                | Remote electrical neuromodulation-active group                 | Applied to lateral arm, once for 30 to 45 minutes                                        | 2 days             | 126 Patients aged 44 $\pm$ 12.25 years, 80.9% female, 86.5% White |
|                                |                                                                   |                                           | Sham stimulation                                               | Applied to lateral arm, once for 30 to 45 minutes                                        | 2 days             | 126 Patients aged 42 $\pm$ 11.81 years, 80.9% female              |
| Zargaran, 2018 <sup>132</sup>  | Crossover RCT in Iran 12/2014 to 05/2015                          | Outpatient                                | Chamomile oil                                                  | Cutaneous gel, 2mL, twice                                                                | 1 day              | 50 Patients aged 37.94 $\pm$ 9.77 years, 86.8% female             |
|                                |                                                                   |                                           | Placebo                                                        | Cutaneous gel, 2mL, twice                                                                | 1 day              | 50 Patients aged 36.03 $\pm$ 8.79 years, 70.5% female             |
| Ziegler, 1994 <sup>133</sup>   | RCT in United States of America                                   | Outpatient                                | Dihydroergotamine                                              | Intranasal, 0.5 mg (per nostril repeated after 15 minutes), once to twice for 4 hours    | 14 days            | 54 Patients aged 39.3 $\pm$ 10.5 years, 83.3% female              |

| Author, Year | Country, Study Design, Study Period | Study Setting (outpatient, inpatient, ED) | Intervention(s) and Comparison | Route of Administration, Dose and Duration | Length of Followup | Patient Characteristics                        |
|--------------|-------------------------------------|-------------------------------------------|--------------------------------|--------------------------------------------|--------------------|------------------------------------------------|
|              |                                     |                                           | Placebo                        | Intranasal, once to twice for 4 hours      | 14 days            | 58 Patients aged 36.7 ±10.75 years, 75% female |

BAP = buccally absorbed prochlorperazine; BMI = body mass index; C = centigrade; cm = centimeter; cc = cubic centimeter; ED = emergency department; Hz = hertz; IV = intravenous; IVP = intravenous prochlorperazine; IM = intramuscular; kHz = kilohertz; gr = gram; kg = kilogram; mA = milliampere; µg = microgram; µg/ mL = microgram/milliliter; µs = microsecond; mg = milligram; mg/kg = milligram/kilogram; mg/mL = milligram /milliliter; mL = milliliter; mL/hour = milliliter/hour; ms = millisecond; N/A = not available; NO = nitrous oxide; RCT = randomized clinical trial s = second; T = temperature

**eTable 9. Adverse events**

**eTable 9.1. Adverse events: calcitonin gene-related peptide receptor antagonists**

| Comparison             | Adverse Events       | Findings                                                      | Study Design               |
|------------------------|----------------------|---------------------------------------------------------------|----------------------------|
| Rimegepant vs. Placebo | Cardiovascular AE    | Rate Ratio: 0.42; 95% CI: 0.01 to 21.10; I <sup>2</sup> =N/A  | 1 RCT <sup>96</sup>        |
|                        | Gastrointestinal AE  | Rate Ratio: 1.69; 95% CI: 1.00 to 2.87; I <sup>2</sup> =N/A   | 3 RCTs <sup>42,91,96</sup> |
|                        | Genitourinary AE     | Rate Ratio: 1.77; 95% CI: 0.81 to 3.88; I <sup>2</sup> =N/A   | 2 RCTs <sup>42,91</sup>    |
|                        | Musculoskeletal AE   | Rate Ratio: 1.67; 95% CI: 0.08 to 37.13; I <sup>2</sup> =N/A  | 1 RCT <sup>96</sup>        |
|                        | Neurological AE      | Rate Ratio: 0.90; 95% CI: 0.40 to 2.00; I <sup>2</sup> =N/A   | 2 RCTs <sup>42,96</sup>    |
|                        | Other AE             | Rate Ratio: 0.42; 95% CI: 0.01 to 21.10; I <sup>2</sup> =N/A  | 1 RCT <sup>96</sup>        |
|                        | Serious AE           | Rate Ratio: 0.54; 95% CI: 0.13 to 2.28; I <sup>2</sup> =0.00% | 3 RCTs <sup>42,91,96</sup> |
|                        | Total AE             | Rate Ratio: 1.23; 95% CI: 1.00 to 1.50; I <sup>2</sup> =N/A   | 3 RCTs <sup>42,91,96</sup> |
|                        | Withdrawal due to AE | RR: 3.01; 95% CI: 0.12 to 73.72; I <sup>2</sup> =N/A          | 1 RCT <sup>42</sup>        |
| Ubrogapant vs. Placebo | Cardiovascular AE    | Rate Ratio: 2.00; 95% CI: 0.11 to 36.61; I <sup>2</sup> =N/A  | 1 RCT <sup>127</sup>       |
|                        | ENT AE               | Rate Ratio: 8.02; 95% CI: 1.06 to 60.48; I <sup>2</sup> =N/A  | 1 RCT <sup>92</sup>        |
|                        | Dermatological AE    | Rate Ratio: 0.10; 95% CI: 0.00 to 2.98; I <sup>2</sup> =N/A   | 1 RCT <sup>127</sup>       |
|                        | Gastrointestinal AE  | Rate Ratio: 1.46; 95% CI: 0.99 to 2.16; I <sup>2</sup> =0%    | 3 RCT <sup>48,92,127</sup> |
|                        | Neurological AE      | Rate Ratio: 1.19; 95% CI: 0.76 to 1.85; I <sup>2</sup> =0%    | 3 RCT <sup>48,92,127</sup> |
|                        | Other AE             | Rate Ratio: 0.20; 95% CI: 0.00 to 10.08; I <sup>2</sup> =N/A  | 1 RCT <sup>127</sup>       |
|                        | Serious AE           | Rate Ratio: 2.54; 95% CI: 0.28 to 23.11; I <sup>2</sup> =N/A  | 2 RCTs <sup>48,92</sup>    |
|                        | Total AE             | Rate Ratio: 1.11; 95% CI: 0.96 to 1.28; I <sup>2</sup> =0%    | 3 RCT <sup>48,92,127</sup> |
|                        | Withdrawal due to AE | RR: 0.63; 95% CI: 0.17 to 2.33; I <sup>2</sup> =4.68          | 2 RCT <sup>48,92</sup>     |

AE = adverse event; CI = confidence interval; ENT = ear, nose, throat; N/A = not applicable; RCT = randomized clinical trial; RR = relative risk

**eTable 9.2. Adverse events: 5-HT<sub>1F</sub> receptor agonist**

| Comparison             | Adverse Events       | Findings                                                        | Study Design                  |
|------------------------|----------------------|-----------------------------------------------------------------|-------------------------------|
| Lasmiditan vs. Placebo | Cardiovascular AE    | Rate Ratio: 1.83; 95% CI: 0.56 to 6.01; I <sup>2</sup> = 0.00%  | 3 RCTs <sup>55,70,85</sup>    |
|                        | Gastrointestinal AE  | Rate Ratio: 2.32; 95% CI: 1.32 to 4.07; I <sup>2</sup> = 0.00%  | 4 RCTs <sup>23,53,70,85</sup> |
|                        | Neurological AE      | Rate Ratio: 4.90; 95% CI: 3.13 to 7.66; I <sup>2</sup> = 62.50% | 4 RCTs <sup>53,55,70,85</sup> |
|                        | Other AE             | Rate Ratio: 4.77; 95% CI: 0.26 to 87.36; I <sup>2</sup> = N/A   | 2 RCT <sup>23,55</sup>        |
|                        | Serious AE           | Rate Ratio: 2.18; 95% CI: 1.18 to 4.02; I <sup>2</sup> =66.60%  | 3 RCTs <sup>23,53,85</sup>    |
|                        | Total AE             | Rate Ratio: 2.67; 95% CI: 2.10 to 3.39; I <sup>2</sup> = 0.00%  | 4 RCTs <sup>53,55,70,85</sup> |
|                        | Withdrawal           | RR: 1.16; 95% CI: 0.90 to 1.49; I <sup>2</sup> = 53.64%         | 4 RCTs <sup>23,53,70,85</sup> |
|                        | Withdrawal due to AE | RR: 5.89; 95% CI: 2.66 to 13.04; I <sup>2</sup> =0.00%          | 2 RCT <sup>23,85</sup>        |

AE = adverse event; CI = confidence interval; N/A = not applicable; RCT = randomized clinical trial; RR = relative risk

**eTable 9.3. Adverse events: antiemetic**

| Comparison                                                               | Adverse Events      | Findings                                                     | Study Design            |
|--------------------------------------------------------------------------|---------------------|--------------------------------------------------------------|-------------------------|
| Chlorpromazine vs. Placebo                                               | Cardiovascular AE   | Rate Ratio: 2.98; 95% CI: 0.82 to 10.84; I <sup>2</sup> =N/A | 1 RCT <sup>98</sup>     |
|                                                                          | Neurological AE     | Rate Ratio: 2.09; 95% CI: 0.96 to 4.56; I <sup>2</sup> =N/A  | 1 RCT <sup>98</sup>     |
|                                                                          | Total AE            | Rate Ratio: 1.61; 95% CI: 0.54 to 4.81; I <sup>2</sup> =N/A  | 1 RCT <sup>98</sup>     |
|                                                                          | Withdrawal          | RR: 1.06; 95% CI: 0.62 to 1.79; I <sup>2</sup> =41.60%       | 2 RCTs <sup>29,98</sup> |
| Diphenhydramine plus metoclopramide vs. Diphenhydramine plus haloperidol | Neurological AE     | Rate Ratio: 0.38; 95% CI: 0.12 to 1.20; I <sup>2</sup> =N/A  | 1 RCT <sup>67</sup>     |
|                                                                          | Sleep-related AE    | Rate Ratio: 1.69; 95% CI: 0.57 to 5.05; I <sup>2</sup> =N/A  | 1 RCT <sup>67</sup>     |
|                                                                          | Total AE            | Rate Ratio: 0.77; 95% CI: 0.38 to 1.57; I <sup>2</sup> =N/A  | 1 RCT <sup>67</sup>     |
| Droperidol vs. Placebo                                                   | Dermatological AE   | Rate Ratio: 0.43; 95% CI: 0.19 to 0.93; I <sup>2</sup> =N/A  | 1 RCT <sup>117</sup>    |
|                                                                          | Gastrointestinal AE | Rate Ratio: 1.25; 95% CI: 0.43 to 3.66; I <sup>2</sup> =N/A  | 1 RCT <sup>117</sup>    |
|                                                                          | Neurological AE     | Rate Ratio: 1.52; 95% CI: 1.03 to 2.23; I <sup>2</sup> =N/A  | 1 RCT <sup>117</sup>    |
|                                                                          | Psychological AE    | Rate Ratio: 7.25; 95% CI: 1.77 to 29.68; I <sup>2</sup> =N/A | 1 RCT <sup>117</sup>    |
|                                                                          | Total AE            | Rate Ratio: 1.61; 95% CI: 1.18 to 2.20; I <sup>2</sup> =N/A  | 1 RCT <sup>117</sup>    |
| Granisetron vs. Placebo                                                  | Cardiovascular AE   | Rate Ratio: 0.80; 95% CI: 0.15 to 4.37; I <sup>2</sup> =N/A  | 1 RCT <sup>110</sup>    |
|                                                                          | Dermatological AE   | Rate Ratio: 0.27; 95% CI: 0.03 to 2.56; I <sup>2</sup> =N/A  | 1 RCT <sup>110</sup>    |
|                                                                          | Gastrointestinal AE | Rate Ratio: 1.87; 95% CI: 0.54 to 6.50; I <sup>2</sup> =N/A  | 1 RCT <sup>110</sup>    |
|                                                                          | Neurological AE     | Rate Ratio: 1.20; 95% CI: 0.22 to 6.55; I <sup>2</sup> =N/A  | 1 RCT <sup>110</sup>    |
|                                                                          | Other AE            | Rate Ratio: 0.80; 95% CI: 0.05 to 12.79; I <sup>2</sup> =N/A | 1 RCT <sup>110</sup>    |
|                                                                          | Serious AE          | Rate Ratio: 0.40; 95% CI 0.01 to 20.16; I <sup>2</sup> =N/A  | 1 RCT <sup>110</sup>    |
|                                                                          | Total AE            | Rate Ratio: 1.10; 95% CI: 0.34 to 3.56; I <sup>2</sup> =N/A  | 1 RCT <sup>110</sup>    |
| Haloperidol vs. Placebo                                                  | Total AE            | Rate Ratio: 6; 95% CI: 2.12 to 120.65; I <sup>2</sup> =N/A   | 1 RCT <sup>75</sup>     |
| Magnesium sulfate vs. Dexamethasone plus metoclopramide                  | Gastrointestinal AE | Rate Ratio: 0.80; 95% CI: 0.21 to 2.98; I <sup>2</sup> =N/A  | 1 RCT <sup>114</sup>    |
|                                                                          | Total AE            | Rate Ratio: 0.57; 95% CI: 0.17 to 1.95; I <sup>2</sup> =N/A  | 1 RCT <sup>114</sup>    |
| Metoclopramide vs. Chlorpromazine                                        | Gastrointestinal AE | Rate Ratio: 1.60; 95% CI: 0.27 to 9.59; I <sup>2</sup> =N/A  | 1 RCT <sup>36</sup>     |
|                                                                          | Neurological AE     | Rate Ratio: 0.98; 95% CI: 0.43 to 2.22; I <sup>2</sup> =N/A  | 1 RCT <sup>36</sup>     |
|                                                                          | Psychological AE    | Rate Ratio: 1.07; 95% CI: 0.07 to 17.08; I <sup>2</sup> =N/A | 1 RCT <sup>36</sup>     |
|                                                                          | Total AE            | Rate Ratio: 0.84; 95% CI: 0.43 to 1.66; I <sup>2</sup> =N/A  | 1 RCT <sup>36</sup>     |

| Comparison                                               | Adverse Events       | Findings                                                      | Study Design                  |
|----------------------------------------------------------|----------------------|---------------------------------------------------------------|-------------------------------|
| Metoclopramide vs. Diphenhydramine plus metoclopramide   | Neurological AE      | Rate Ratio: 0.97; 95% CI: 0.58 to 1.61; I <sup>2</sup> =N/A   | 1 RCT <sup>62</sup>           |
|                                                          | Total AE             | Rate Ratio: 0.97; 95% CI: 0.58 to 1.61; I <sup>2</sup> =N/A   | 1 RCT <sup>62</sup>           |
|                                                          | Withdrawal           | Rate Ratio: 0.20; 95% CI: 0.02 to 1.68; I <sup>2</sup> =N/A   | 1 RCT <sup>62</sup>           |
| Metoclopramide vs. Magnesium sulfate plus metoclopramide | Neurological AE      | Rate Ratio: 0.30; 95% CI: 0.03 to 2.93; I <sup>2</sup> =N/A   | 1 RCT <sup>41</sup>           |
|                                                          | Other AE             | Rate Ratio: 0.42; 95% CI: 0.14 to 1.19; I <sup>2</sup> =N/A   | 1 RCT <sup>41</sup>           |
|                                                          | Total AE             | Rate Ratio: 0.39; 95% CI: 0.15 to 1.02; I <sup>2</sup> =N/A   | 1 RCT <sup>41</sup>           |
|                                                          | Withdrawal           | RR: 0.61; 95% CI: 0.11 to 3.29; I <sup>2</sup> =N/A           | 1 RCT <sup>41</sup>           |
| Metoclopramide vs. Magnesium sulfate                     | Total AE             | Rate Ratio: 0.92; 95% CI: 0.15 to 5.53; I <sup>2</sup> =N/A   | 1 RCT <sup>79</sup>           |
| Metoclopramide vs. Placebo                               | Neurological AE      | Rate Ratio: 0.21; 95% CI: 0.37 to 4.03; I <sup>2</sup> =N/A   | 2 RCTs <sup>49,123</sup>      |
|                                                          | Serious AE           | Rate Ratio: 1.08; 95% CI 0.02 to 54.60; I <sup>2</sup> =N/A   | 1 RCT <sup>123</sup>          |
|                                                          | Total AE             | Rate Ratio: 1.21; 95% CI: 0.37 to 4.03; I <sup>2</sup> =N/A   | 2 RCTs <sup>49,123</sup>      |
| Metoclopramide plus paracetamol vs. Placebo              | Withdrawal           | RR: 1.64; 95% CI: 0.41 to 6.55; I <sup>2</sup> =N/A           | 1 RCT <sup>45</sup>           |
| Paracetamol vs. Metoclopramide                           | Total AE             | Rate Ratio: 0.09; 95% CI: 0.01 to 0.67; I <sup>2</sup> =N/A   | 1 RCT <sup>112</sup>          |
| Prochlorperazine vs. Magnesium sulfate                   | Total AE             | Rate Ratio: 2.35; 95% CI: 0.59 to 9.38; I <sup>2</sup> =N/A   | 1 RCT <sup>79</sup>           |
| Prochlorperazine vs. Metoclopramide                      | Neurological AE      | Rate Ratio: 0.95; 95% CI: 0.50 to 1.81; I <sup>2</sup> =0.00% | 3 RCTs <sup>40,60,77</sup>    |
|                                                          | Total AE             | Rate Ratio: 1.39; 95% CI: 0.73 to 2.67; I <sup>2</sup> =0.00% | 4 RCTs <sup>40,60,77,79</sup> |
|                                                          | Withdrawal           | RR: 2.92; 95% CI: 0.32 to 26.88; I <sup>2</sup> =N/A          | 1 RCT <sup>60</sup>           |
|                                                          | Withdrawal due to AE | RR: 1.09; 95% CI: 0.17 to 7.10; I <sup>2</sup> =N/A           | 1 RCT <sup>60</sup>           |
| Prochlorperazine vs. Octreotide                          | Neurological AE      | Rate Ratio: 4.2; 95% CI: 0.87 to 20.22; I <sup>2</sup> =N/A   | 1 RCT <sup>100</sup>          |
|                                                          | Total AE             | Rate Ratio: 3.36; 95% CI: 1.21 to 9.33; I <sup>2</sup> =N/A   | 1 RCT <sup>100</sup>          |
|                                                          | Withdrawal           | RR: 0.40; 95% CI: 0.02 to 9.24; I <sup>2</sup> =N/A           | 1 RCT <sup>100</sup>          |
|                                                          | Withdrawal due to AE | RR:0.40; 95% CI: 0.02 to 9.24; I <sup>2</sup> =N/A            | 1 RCT <sup>100</sup>          |
| Prochlorperazine vs. Placebo                             | Neurological AE      | Rate Ratio: 6.07; 95% CI: 1.39 to 26.55; I <sup>2</sup> =N/A  | 1 RCT <sup>115</sup>          |
|                                                          | Total AE             | Rate Ratio: 6.48; 95% CI: 1.49 to 28.17; I <sup>2</sup> =N/A  | 1 RCT <sup>115</sup>          |
|                                                          | Withdrawal           | Rate Ratio: 1.89; 95% CI: 0.57 to 6.22; I <sup>2</sup> =N/A   | 1 RCT <sup>115</sup>          |
| Valproate vs. Prochlorperazine                           | Withdrawal           | RR: 3; 95% CI: 0.13 to 69.52; I <sup>2</sup> =N/A             | 1 RCT <sup>121</sup>          |

AE = adverse event; CI = confidence interval; N/A = not applicable; RCT = randomized clinical trial; RR = relative risk



**eTable 9.4. Adverse events: ergot alkaloids**

| Comparison                                                       | Adverse Events       | Findings                                                         | Study Design                    |
|------------------------------------------------------------------|----------------------|------------------------------------------------------------------|---------------------------------|
| Dihydroergotamine vs. Chlorpromazine                             | Gastrointestinal AE  | Rate Ratio: 2.54; 95% CI: 0.81 to 7.97; I <sup>2</sup> =N/A      | 1 RCT <sup>28</sup>             |
|                                                                  | Total AE             | Rate Ratio: 2.54; 95% CI: 0.81 to 7.97; I <sup>2</sup> =N/A      | 1 RCT <sup>28</sup>             |
| Dihydroergotamine vs. Lidocaine                                  | Gastrointestinal AE  | Rate Ratio: 0.45; 95% CI: 0.16 to 1.31; I <sup>2</sup> =N/A      | 1 RCT <sup>28</sup>             |
|                                                                  | Total AE             | Rate Ratio: 0.45; 95% CI: 0.16 to 1.31; I <sup>2</sup> =N/A      | 1 RCT <sup>28</sup>             |
| Dihydroergotamine vs. Placebo                                    | Cardiovascular AE    | Rate Ratio: 0.46; 95% CI: 0.12 to 1.78; I <sup>2</sup> =N/A      | 1 RCT <sup>133</sup>            |
|                                                                  | ENT AE               | Rate Ratio: 0.58; 95% CI: 0.24 to 1.37; I <sup>2</sup> =N/A      | 1 RCT <sup>24</sup>             |
|                                                                  | Gastrointestinal AE  | Rate Ratio: 2.78; 95% CI: 1.70 to 4.55; I <sup>2</sup> =0.3%     | 3 RCTs <sup>24,25,35</sup>      |
|                                                                  | Neurological AE      | Rate Ratio: 0.90; 95% CI: 0.17 to 4.71; I <sup>2</sup> =0.0%     | 3 RCTs <sup>24,25,35</sup>      |
|                                                                  | Respiratory AE       | Rate Ratio: 1.30; 95% CI: 0.69 to 2.45; I <sup>2</sup> =N/A      | 1 RCT <sup>24</sup>             |
|                                                                  | Serious AE           | Rate Ratio: 0.69; 95% CI: -0.03 to 16.62; I <sup>2</sup> = 0.00% | 4 RCTs <sup>24,25,35,133</sup>  |
|                                                                  | Total AE             | Rate Ratio: 2.17; 95% CI: 0.65 to 7.31; I <sup>2</sup> =66%      | 4 RCTs <sup>24,25,35,133</sup>  |
|                                                                  | Withdrawal AE        | RR: 2.81; 95% CI: 0.61 to 12.93; I <sup>2</sup> =0.00%           | 4 RCTs <sup>24,25,124,133</sup> |
| Ergotamine vs. Placebo                                           | Neurological AE      | Rate Ratio: 1.21; 95% CI: 0.11 to 13.39; I <sup>2</sup> =N/A     | 1 RCT <sup>115</sup>            |
|                                                                  | Total AE             | Rate Ratio: 1.21; 95% CI: 0.11 to 13.39; I <sup>2</sup> =N/A     | 1 RCT <sup>115</sup>            |
|                                                                  | Withdrawal           | Rate Ratio: 1.67; 95% CI: 0.56 to 4.98; I <sup>2</sup> =N/A      | 2 RCTs <sup>80,115</sup>        |
| Ergotamine vs. Prochlorperazine                                  | Neurological AE      | Rate Ratio: 0.20; 95% CI: 0.03 to 1.52; I <sup>2</sup> =N/A      | 1 RCT <sup>115</sup>            |
|                                                                  | Total AE             | Rate Ratio: 0.19; 95% CI: 0.02 to 1.41; I <sup>2</sup> =N/A      | 1 RCT <sup>115</sup>            |
|                                                                  | Withdrawal           | Rate Ratio: 1.28; 95% CI: 0.45 to 3.70; I <sup>2</sup> =N/A      | 1 RCT <sup>115</sup>            |
| Ergotamine plus caffeine vs. Placebo                             | Gastrointestinal AE  | Rate Ratio: 1.00; 95% CI: 0.50 to 2.01; I <sup>2</sup> =N/A      | 1 RCT <sup>47</sup>             |
|                                                                  | Neurological AE      | Rate Ratio: 1.24; 95% CI: 0.54 to 2.83; I <sup>2</sup> =N/A      | 1 RCT <sup>47</sup>             |
|                                                                  | Other AE             | Rate Ratio: 2.61; 95% CI: 0.31 to 22.35; I <sup>2</sup> =N/A     | 1 RCT <sup>47</sup>             |
|                                                                  | Total AE             | Rate Ratio: 2.34; 95% CI: 0.00 to 91814.93; I <sup>2</sup> =77%  | 2 RCTs <sup>47,59</sup>         |
|                                                                  | Withdrawal           | Rate Ratio: 0.78; 95% CI: 0.23 to 2.72; I <sup>2</sup> =N/A      | 1 RCT <sup>47</sup>             |
|                                                                  | Withdrawal due to AE | RR: 2.00; 95% CI: 0.54 to 7.35; I <sup>2</sup> =67.50%           | 2 RCTs <sup>47,59</sup>         |
| Ergotamine plus caffeine plus pentobarbital plus bellafoline vs. | Gastrointestinal AE  | Rate Ratio: 0.52; 95% CI: 0.12 to 2.17 I <sup>2</sup> =N/A       | 1 RCT <sup>59</sup>             |
|                                                                  | Total AE             | Rate Ratio: 0.94; 95% CI: 0.42 to 2.14; I <sup>2</sup> =N/A      | 1 RCT <sup>59</sup>             |

| <b>Comparison</b>                                                        | <b>Adverse Events</b> | <b>Findings</b>                                              | <b>Study Design</b> |
|--------------------------------------------------------------------------|-----------------------|--------------------------------------------------------------|---------------------|
| Ergotamine plus caffeine                                                 | Withdrawal due to AE  | RR: 0.43; 95% CI: 0.08 to 2.25; I <sup>2</sup> =N/A          | 1 RCT <sup>59</sup> |
| Ergotamine plus caffeine plus pentobarbital plus bellafoline vs. Placebo | Total AE              | Rate Ratio: 6.00; 95% CI: 1.34 to 26.81; I <sup>2</sup> =N/A | 1 RCT <sup>59</sup> |
|                                                                          | Withdrawal due to AE  | RR: 5.00; 95% CI: 0.25 to 101.68; I <sup>2</sup> =N/A        | 1 RCT <sup>59</sup> |

AE = adverse event; CI = confidence interval; ENT = ear, nose, throat; N/A = not applicable; RCT = randomized clinical trial

**eTable 9.5. Adverse events: opioids**

| Comparison                                                             | Adverse Events       | Findings                                                        | Study Design            |
|------------------------------------------------------------------------|----------------------|-----------------------------------------------------------------|-------------------------|
| Butorphanol vs. Placebo                                                | ENT AE               | Rate Ratio: 4.21; 95% CI: 0.53 to 33.2; I <sup>2</sup> =N/A     | 1 RCT <sup>73</sup>     |
|                                                                        | Gastrointestinal AE  | Rate Ratio: 3.05; 95% CI: 1.61 to 5.80; I <sup>2</sup> =0.00%   | 2 RCTs <sup>57,73</sup> |
|                                                                        | Neurological AE      | Rate Ratio: 8.31; 95% CI: 4.47 to 15.47; I <sup>2</sup> =11.50% | 2 RCTs <sup>57,73</sup> |
|                                                                        | Ophthalmologica I AE | Rate Ratio: 4.00; 95% CI: 0.45 to 35.97; I <sup>2</sup> =N/A    | 1 RCT <sup>57</sup>     |
|                                                                        | Psychological AE     | Rate Ratio: 1.64; 95% CI: 0.54 to 4.97; I <sup>2</sup> =N/A     | 1 RCT <sup>73</sup>     |
|                                                                        | Total AE             | Rate Ratio: 6.08; 95% CI: 4.19 to 8.82; I <sup>2</sup> =94.00%  | 2 RCTs <sup>57,73</sup> |
| Hydromorphone vs. Diphenhydramine plus prochlorperazine                | Total AE             | Rate Ratio: 2.95; 95% CI: 0.80 to 10.91; I <sup>2</sup> =N/A    | 1 RCT <sup>64</sup>     |
|                                                                        | Withdrawal           | RR: 0.33; 95% CI: 0.01 to 7.91; I <sup>2</sup> =N/A             | 1 RCT <sup>64</sup>     |
| Hydroxyzine plus meperidine vs. Dihydroergotamine plus hydroxyzine     | Total AE             | Rate Ratio: 1.31; 95% CI: 0.92 to 1.86; I <sup>2</sup> =N/A     | 1 RCT <sup>37</sup>     |
| Meperidine vs. Droperidol                                              | Neurological AE      | Rate Ratio: 0.71; 95% CI: 0.12 to 4.27; I <sup>2</sup> =N/A     | 1 RCT <sup>109</sup>    |
|                                                                        | Total AE             | Rate Ratio: 0.71; 95% CI: 0.12 to 4.27; I <sup>2</sup> =N/A     | 1 RCT <sup>109</sup>    |
| Meperidine plus dimenhydrinate vs. Chlorpromazine                      | Gastrointestinal AE  | Rate Ratio: 0.73; 95% CI: 0.12 to 4.35; I <sup>2</sup> =N/A     | 1 RCT <sup>86</sup>     |
|                                                                        | Neurological AE      | Rate Ratio: 0.78; 95% CI: 0.25 to 2.46; I <sup>2</sup> =N/A     | 1 RCT <sup>86</sup>     |
|                                                                        | Total AE             | Rate Ratio: 0.51; 95% CI: 0.21 to 1.25; I <sup>2</sup> =N/A     | 1 RCT <sup>86</sup>     |
| Meperidine plus hydroxyzine vs. Dihydroergotamine plus hydroxyzine     | Gastrointestinal AE  | Rate Ratio: 0.40; 95% CI: 0.13 to 1.28; I <sup>2</sup> =N/A     | 1 RCT <sup>37</sup>     |
|                                                                        | Neurological AE      | Rate Ratio: 1.74; 95% CI: 1.18 to 2.58; I <sup>2</sup> =N/A     | 1 RCT <sup>37</sup>     |
|                                                                        | Total AE             | Rate Ratio: 1.31; 95% CI: 0.92 to 1.86; I <sup>2</sup> =N/A     | 1 RCT <sup>37</sup>     |
|                                                                        | Withdrawal due to AE | RR: 1.00; 95% CI: 0.37 to 2.73; I <sup>2</sup> =N/A             | 1 RCT <sup>37</sup>     |
| Meperidine plus hydroxyzine vs. Dihydroergotamine plus metoclopramide  | Serious AE           | Rate Ratio: 1.00; 95% CI: 0.02 to 50.40; I <sup>2</sup> =N/A    | 1 RCT <sup>83</sup>     |
| Meperidine plus promethazine vs. Dihydroergotamine plus metoclopramide | Cardiovascular AE    | Rate Ratio: 8.62; 95% CI: 1.08 to 68.88; I <sup>2</sup> =N/A    | 1 RCT <sup>113</sup>    |
|                                                                        | Gastrointestinal AE  | Rate Ratio: 1.79; 95% CI: 0.43 to 7.51; I <sup>2</sup> =N/A     | 1 RCT <sup>113</sup>    |
|                                                                        | Neurological AE      | Rate Ratio: 4.85; 95% CI: 1.64 to 14.32; I <sup>2</sup> =N/A    | 1 RCT <sup>113</sup>    |
|                                                                        | Total AE             | Rate Ratio: 4.17; 95% CI: 1.92 to 9.08; I <sup>2</sup> =N/A     | 1 RCT <sup>113</sup>    |
| Methadone vs. Butorphanol                                              | Gastrointestinal AE  | Rate Ratio: 0.17; 95% CI: 0.02 to 1.38; I <sup>2</sup> =N/A     | 1 RCT <sup>57</sup>     |

| Comparison                                                 | Adverse Events          | Findings                                                      | Study Design         |
|------------------------------------------------------------|-------------------------|---------------------------------------------------------------|----------------------|
|                                                            | Neurological AE         | Rate Ratio: 0.81; 95% CI: 0.49 to 1.31; I <sup>2</sup> =N/A   | 1 RCT <sup>57</sup>  |
|                                                            | Ophthalmologica<br>I AE | Rate Ratio: 0.50; 95% CI: 0.09 to 2.73; I <sup>2</sup> =N/A   | 1 RCT <sup>57</sup>  |
|                                                            | Psychological<br>AE     | Rate Ratio: 0.20; 95% CI: 0.02 to 1.71; I <sup>2</sup> =N/A   | 1 RCT <sup>57</sup>  |
|                                                            | Total AE                | Rate Ratio: 0.86; 95% CI: 0.50 to 1.47; I <sup>2</sup> =N/A   | 1 RCT <sup>57</sup>  |
| Methadone vs. Placebo                                      | Gastrointestinal<br>AE  | Rate Ratio: 0.50; 95% CI: 0.05 to 5.51; I <sup>2</sup> =N/A   | 1 RCT <sup>57</sup>  |
|                                                            | Neurological AE         | Rate Ratio: 4.83; 95% CI: 2.01 to 11.64; I <sup>2</sup> =N/A  | 1 RCT <sup>57</sup>  |
|                                                            | Ophthalmologica<br>I AE | Rate Ratio: 2.00; 95% CI: 0.18 to 22.06; I <sup>2</sup> =N/A  | 1 RCT <sup>57</sup>  |
|                                                            | Total AE                | Rate Ratio: 1.79; 95% CI: 0.93 to 3.44; I <sup>2</sup> =N/A   | 1 RCT <sup>57</sup>  |
| Methotrimeprazine vs.<br>Dimenhydrinate plus<br>meperidine | Cardiovascular<br>AE    | Rate Ratio: 10.00; 95% CI: 1.28 to 78.12; I <sup>2</sup> =N/A | 1 RCT <sup>119</sup> |
|                                                            | Gastrointestinal<br>AE  | Rate Ratio: 0.80; 95% CI: 0.32 to 2.03; I <sup>2</sup> =N/A   | 1 RCT <sup>119</sup> |
|                                                            | Neurological AE         | Rate Ratio: 1.31; 95% CI: 0.85 to 2.04; I <sup>2</sup> =N/A   | 1 RCT <sup>119</sup> |
|                                                            | Total AE                | Rate Ratio: 1.39; 95% CI: 0.95 to 2.03; I <sup>2</sup> =N/A   | 1 RCT <sup>119</sup> |
| Tramadol plus<br>acetaminophen vs.<br>Placebo              | Serious AE              | Rate Ratio: 0.99; 95% CI: 0.02 to 50.13; I <sup>2</sup> =N/A  | 1 RCT <sup>116</sup> |
|                                                            | Total AE                | Rate Ratio: 2.49; 95% CI: 1.48 to 4.18; I <sup>2</sup> =N/A   | 1 RCT <sup>116</sup> |
|                                                            | Withdrawal              | RR: 0.94; 95% CI: 0.62 to 1.43; I <sup>2</sup> =N/A           | 1 RCT <sup>116</sup> |
|                                                            | Withdrawal due<br>to AE | RR: 0.99; 95% CI: 0.06 to 15.79; I <sup>2</sup> =N/A          | 1 RCT <sup>116</sup> |

AE = adverse event; CI = confidence interval; ENT = ear, nose, and throat; N/A = not applicable; RCT = randomized clinical trial; RR = relative risk

**eTable 9.6. Adverse events: other pharmacological interventions**

| Comparison                                       | Adverse Events       | Findings                                                      | Study Design             |
|--------------------------------------------------|----------------------|---------------------------------------------------------------|--------------------------|
| Acetaminophen vs. Placebo                        | ENT AE               | Rate Ratio: 0.91; 95% CI: 0.57 to 1.45; I <sup>2</sup> =N/A   | 1 RCT <sup>105</sup>     |
|                                                  | Gastrointestinal AE  | Rate Ratio: 0.81; 95% CI: 0.62 to 1.07; I <sup>2</sup> =72.8  | 2 RCTs <sup>89,105</sup> |
|                                                  | Neurological AE      | Rate Ratio: 0.90; 95% CI: 0.60 to 1.37; I <sup>2</sup> =0.00% | 2 RCTs <sup>89,105</sup> |
|                                                  | Other AE             | Rate Ratio: 0.75; 95% CI: 0.45 to 1.27; I <sup>2</sup> =N/A   | 1 RCT <sup>89</sup>      |
|                                                  | Serious AE           | Rate Ratio: 0.99; 95% CI 0.06 to 15.86; I <sup>2</sup> =0.00% | 2 RCTs <sup>89,105</sup> |
|                                                  | Total AE             | Rate Ratio: 0.82; 95% CI: 0.64 to 1.06; I <sup>2</sup> =0.00% | 2 RCTs <sup>89,105</sup> |
|                                                  | Withdrawal           | RR: 0.69; 95% CI: 0.54 to 0.88; I <sup>2</sup> =0.00%         | 2 RCTs <sup>89,105</sup> |
|                                                  | Withdrawal due to AE | RR: 1.98; 95% CI: 0.18 to 21.64; I <sup>2</sup> =N/A          | 1 RCT <sup>105</sup>     |
| Chlorpromazine vs. Lidocaine                     | Gastrointestinal AE  | Rate Ratio: 0.87; 95% CI: 0.23 to 3.23; I <sup>2</sup> =N/A   | 1 RCT <sup>28</sup>      |
|                                                  | Total AE             | Rate Ratio: 0.87; 95% CI: 0.23 to 3.23; I <sup>2</sup> =N/A   | 1 RCT <sup>28</sup>      |
| Dexamethasone vs. Placebo                        | Gastrointestinal AE  | Rate Ratio: 0.95; 95% CI: 0.39 to 2.34; I <sup>2</sup> =N/A   | 1 RCT <sup>50</sup>      |
|                                                  | Immunological AE     | Rate Ratio: 8.41; 95% CI: 1.06 to 66.35; I <sup>2</sup> =N/A  | 1 RCT <sup>58</sup>      |
|                                                  | Musculoskeletal AE   | Rate Ratio: 0.28; 95% CI: 0.03 to 2.74; I <sup>2</sup> =N/A   | 1 RCT <sup>50</sup>      |
|                                                  | Neurological AE      | Rate Ratio: 1.21; 95% CI: 0.55 to 2.65; I <sup>2</sup> =0.00% | 2 RCTs <sup>50,58</sup>  |
|                                                  | Psychological AE     | Rate Ratio: 0.85; 95% CI: 0.12 to 6.07; I <sup>2</sup> =N/A   | 1 RCT <sup>50</sup>      |
|                                                  | Total AE             | Rate Ratio: 0.80; 95% CI: 0.51 to 1.26; I <sup>2</sup> =0.00% | 2 RCTs <sup>50,58</sup>  |
|                                                  | Withdrawal           | RR: 0.39; 95% CI: 0.14 to 1.05; I <sup>2</sup> =N/A           | 1 RCT <sup>50,58</sup>   |
| Greater occipital nerve block vs. Placebo        | Musculoskeletal AE   | Rate Ratio: 1.15; 95% CI: 0.07 to 18.45; I <sup>2</sup> =N/A  | 1 RCT <sup>63</sup>      |
|                                                  | Total AE             | Rate Ratio: 2.31; 95% CI: 0.42 to 12.60; I <sup>2</sup> =N/A  | 1 RCT <sup>63</sup>      |
| Greater occipital nerve block vs. Metoclopramide | Dermatological AE    | Rate Ratio: 1.88; 95% CI: 0.17 to 20.83; I <sup>2</sup> =N/A  | 1 RCT <sup>65</sup>      |
|                                                  | Neurological AE      | Rate Ratio: 1.29; 95% CI: 0.52 to 3.22; I <sup>2</sup> =N/A   | 1 RCT <sup>65</sup>      |
|                                                  | Gastrointestinal AE  | Rate Ratio: 3.76; 95% CI: 0.17 to 83.33; I <sup>2</sup> =N/A  | 1 RCT <sup>65</sup>      |
|                                                  | Total AE             | Rate Ratio: 1.57; 95% CI: 0.69 to 3.58; I <sup>2</sup> =N/A   | 1 RCT <sup>65</sup>      |
| Ketamine vs. Placebo                             | Serious AE           | Rate Ratio: 1.13; 95% CI 0.02 to 56.70; I <sup>2</sup> =N/A   | 1 RCT <sup>51</sup>      |
| Lidocaine vs. Placebo                            | Dermatological AE    | Rate Ratio: 4.44; 95% CI: 2.16 to 9.16; I <sup>2</sup> =N/A   | 1 RCT <sup>26</sup>      |
|                                                  | Neurological AE      | Rate Ratio: 1.22; 95% CI: 0.34 to 4.33; I <sup>2</sup> =N/A   | 1 RCT <sup>31</sup>      |

| Comparison                  | Adverse Events       | Findings                                                       | Study Design               |
|-----------------------------|----------------------|----------------------------------------------------------------|----------------------------|
|                             | Serious AE           | Rate Ratio: 1.00; 95% CI 0.02 to 50.40; I <sup>2</sup> =N/A    | 1 RCT <sup>26</sup>        |
|                             | Total AE             | Rate Ratio: 3.30; 95% CI: 1.76 to 6.17; I <sup>2</sup> =68.10% | 2 RCTs <sup>26,31</sup>    |
|                             | Withdrawal           | RR: 0.16; 95% CI: 0.01 to 3.25; I <sup>2</sup> =N/A            | 1 RCT <sup>31</sup>        |
| Propofol vs. Placebo        | Neurological AE      | Rate Ratio: 5.43; 95% CI: 0.27 to 108.37; I <sup>2</sup> =N/A  | 1 RCT <sup>99</sup>        |
|                             | Cardiovascular AE    | Rate Ratio: 3.62; 95% CI: 0.16 to 80.25; I <sup>2</sup> =N/A   | 1 RCT <sup>99</sup>        |
|                             | Total AE             | Rate Ratio: 9.05; 95% CI: 0.49 to 165.60; I <sup>2</sup> =N/A  | 1 RCT <sup>99</sup>        |
|                             | Withdrawal due to AE | RR: 8.18; 95% CI: 0.47 to 142.62; I <sup>2</sup> =N/A          | 1 RCT <sup>99</sup>        |
|                             | Withdrawal           | RR: 1.16; 95% CI: 0.54 to 2.51; I <sup>2</sup> =N/A            | 1 RCT <sup>99</sup>        |
| Octreotide vs. Placebo      | Gastrointestinal AE  | Rate Ratio: 5.75; 95% CI: 0.67 to 49.22; I <sup>2</sup> =N/A   | 1 RCT <sup>87</sup>        |
|                             | Serious AE           | Rate Ratio: 1.15; 95% CI 0.02 to 57.96; I <sup>2</sup> =N/A    | 1 RCT <sup>87</sup>        |
|                             | Total AE             | Rate Ratio: 1.73; 95% CI: 0.49 to 6.11; I <sup>2</sup> =N/A    | 1 RCT <sup>87</sup>        |
|                             | Withdrawal           | RR: 1.15; 95% CI: 0.08 to 17.22; I <sup>2</sup> =N/A           | 1 RCT <sup>87</sup>        |
| Valproate vs. Dexamethasone | Gastrointestinal AE  | Rate Ratio: 1.50; 95% CI: 0.25 to 8.98; I <sup>2</sup> =N/A    | 1 RCT <sup>97</sup>        |
|                             | Neurological AE      | Rate Ratio: 4.00; 95% CI: 0.45 to 35.79; I <sup>2</sup> =N/A   | 1 RCT <sup>97</sup>        |
|                             | Serious AE           | Rate Ratio: 1.00; 95% CI 0.02 to 50.40; I <sup>2</sup> =N/A    | 1 RCT <sup>97</sup>        |
|                             | Total AE             | Rate Ratio: 2.33; 95% CI: 0.60 to 9.02; I <sup>2</sup> =N/A    | 1 RCT <sup>97</sup>        |
|                             | Withdrawal           | RR: 0.64; 95% CI: 0.29 to 1.40; I <sup>2</sup> =79.10%         | 3 RCTs <sup>56,82,97</sup> |

AE = adverse event; CI = confidence interval; ENT = ear, nose, and throat; N/A = not applicable; RCT = randomized clinical trial; RR = relative risk

**eTable 9.7. Adverse events: nonpharmacologic therapy**

| Comparison                                                                           | Adverse Events       | Findings                                                      | Study Design             |
|--------------------------------------------------------------------------------------|----------------------|---------------------------------------------------------------|--------------------------|
| Acupuncture vs. Sham acupuncture                                                     | Hematological AE     | Rate Ratio: 1.50; 95% CI: 0.25 to 8.89; I <sup>2</sup> =N/A   | 1 RCT <sup>128</sup>     |
|                                                                                      | Serious AE           | RR: 1.03; 95% CI: 0.02 to 52.13; I <sup>2</sup> = N/A         | 1 RCT <sup>88</sup>      |
|                                                                                      | Total AE             | Rate Ratio: 1.75; 95% CI: 0.51 to 5.98; I <sup>2</sup> =N/A   | 1 RCT <sup>128</sup>     |
|                                                                                      | Withdrawal           | RR: 0.55; 95% CI: 0.23 to 1.33; I <sup>2</sup> =0.00%         | 2 RCTs <sup>88,128</sup> |
|                                                                                      | Withdrawal due to AE | RR: 0.52; 95% CI: 0.05 to 5.55; I <sup>2</sup> =N/A           | 1 RCT <sup>88</sup>      |
| External trigeminal nerve stimulation vs. Sham external trigeminal nerve stimulation | Neurological AE      | Rate Ratio: 2.22; 95% CI: 0.58 to 8.88; I <sup>2</sup> =0.00% | 2 RCTs <sup>39,74</sup>  |
|                                                                                      | Serious AE           | Rate Ratio: 1.04; 95% CI: 0.02 to 52.34; I <sup>2</sup> =N/A  | 1 RCT <sup>39</sup>      |
|                                                                                      | Total AE             | Rate Ratio: 2.46; 95% CI: 0.62 to 9.72; I <sup>2</sup> =0.00% | 2 RCTs <sup>39,74</sup>  |
|                                                                                      | Withdrawal due to AE | RR: 1.46; 95% CI: 0.26 to 8.31; I <sup>2</sup> =N/A           | 1 RCT <sup>74</sup>      |
| Eye movement desensitization reprocessing vs. Usual care                             | Withdrawal           | RR: 1.25; 95% CI: 0.38 to 4.14; I <sup>2</sup> =N/A           | 1 RCT <sup>95</sup>      |
| Magnetic stimulation vs. Sham stimulation                                            | ENT AE               | Rate Ratio: 1.94; 95% CI: 0.18 to 21.41; I <sup>2</sup> =N/A  | 1 RCT <sup>90</sup>      |
|                                                                                      | Gastrointestinal AE  | Rate Ratio: 0.97; 95% CI: 0.06 to 15.52; I <sup>2</sup> =N/A  | 1 RCT <sup>90</sup>      |
|                                                                                      | Neurological AE      | Rate Ratio: 1.94; 95% CI: 0.49 to 7.76; I <sup>2</sup> =N/A   | 1 RCT <sup>90</sup>      |
|                                                                                      | Serious AE           | Rate Ratio: 0.97; 95% CI: 0.02 to 48.91; I <sup>2</sup> =N/A  | 1 RCT <sup>90</sup>      |
|                                                                                      | Total AE             | Rate Ratio: 1.51; 95% CI: 0.65 to 3.49; I <sup>2</sup> =N/A   | 1 RCT <sup>90</sup>      |
|                                                                                      | Withdrawal           | RR: 1.14; 95% CI: 0.64 to 2.05; I <sup>2</sup> =N/A           | 1 RCT <sup>90</sup>      |
| Noninvasive vagus nerve stimulation vs. Sham stimulation                             | Dermatological AE    | Rate Ratio: 0.44; 95% CI: 0.11 to 1.71; I <sup>2</sup> =N/A   | 1 RCT <sup>122</sup>     |
|                                                                                      | ENT AE               | Rate Ratio: 0.69; 95% CI: 0.12 to 4.12; I <sup>2</sup> =N/A   | 1 RCT <sup>122</sup>     |
|                                                                                      | Serious AE           | Rate Ratio: 1.04; 95% CI: 0.02 to 52.05; I <sup>2</sup> = N/A | 1 RCT <sup>122</sup>     |
|                                                                                      | Total AE             | Rate Ratio: 0.99; 95% CI: 0.55 to 1.77; I <sup>2</sup> =N/A   | 1 RCT <sup>122</sup>     |
|                                                                                      | Withdrawal           | RR: 0.69; 95% CI: 0.12 to 4.05; I <sup>2</sup> =N/A           | 1 RCT <sup>122</sup>     |
|                                                                                      | Withdrawal due to AE | RR: 0.21; 95% CI: 0.01 to 4.26; I <sup>2</sup> =N/A           | 1 RCT <sup>122</sup>     |
| Remote electrical neuromodulation vs. Sham stimulation                               | Dermatological AE    | Rate Ratio: 3.00; 95% CI: 0.31 to 28.84; I <sup>2</sup> =N/A  | 1 RCT <sup>131</sup>     |
|                                                                                      | Musculoskeletal AE   | Rate Ratio: 1.00; 95% CI: 0.06 to 15.99; I <sup>2</sup> =N/A  | 1 RCT <sup>131</sup>     |
|                                                                                      | Neurological AE      | Rate Ratio: 3.00; 95% CI: 0.31 to 28.84; I <sup>2</sup> =N/A  | 1 RCT <sup>131</sup>     |

| <b>Comparison</b> | <b>Adverse Events</b> | <b>Findings</b>                                              | <b>Study Design</b>  |
|-------------------|-----------------------|--------------------------------------------------------------|----------------------|
|                   | Other AE              | Rate Ratio: 3.00; 95% CI: 0.31 to 28.84; I <sup>2</sup> =N/A | 1 RCT <sup>131</sup> |
|                   | Serious AE            | Rate Ratio: 1.00; 95% CI: 0.02 to 50.40; I <sup>2</sup> =N/A | 1 RCT <sup>131</sup> |
|                   | Total AE              | Rate Ratio: 1.27; 95% CI: 0.64 to 2.49; I <sup>2</sup> =N/A  | 1 RCT <sup>131</sup> |
|                   | Withdrawal            | RR: 1.17; 95% CI: 0.71 to 1.93; I <sup>2</sup> =N/A          | 1 RCT <sup>131</sup> |

AE = adverse event; CI = confidence interval; ENT = ear, nose, and throat; N/A = not applicable; RCT = randomized clinical trial; RR = relative risk



**eTable 10. Subgroup analysis**

**eTable 10.1 Subgroup analysis by risk of bias for calcitonin gene-related peptide receptor antagonists**

| Comparison             | Outcome                    | Risk of Bias | Findings                                               |
|------------------------|----------------------------|--------------|--------------------------------------------------------|
| Rimegepant vs. Placebo | Pain Free 2 hours          | Moderate ROB | RR: 1.64; 95% CI: 1.22 to 2.18; I <sup>2</sup> =N/A    |
|                        |                            | High ROB     | RR: 1.89; 95% CI: 1.53 to 2.33; I <sup>2</sup> =0.00%  |
|                        |                            | Overall      | RR: 1.80; 95% CI: 1.52 to 2.13; I <sup>2</sup> =0.00%  |
|                        | Pain Relief 2 hours        | Moderate ROB | RR: 1.36; 95% CI: 1.20 to 1.54; I <sup>2</sup> =N/A    |
|                        |                            | High ROB     | RR: 1.36; 95% CI: 1.24 to 1.49; I <sup>2</sup> =0.00%  |
|                        |                            | Overall      | RR: 1.36; 95% CI: 1.26 to 1.46; I <sup>2</sup> =0.00%  |
|                        | Restored Function 2 hours  | Moderate ROB | RR: 1.40; 95% CI: 1.14 to 1.70; I <sup>2</sup> =N/A    |
|                        |                            | High ROB     | RR: 1.45; 95% CI: 1.23 to 1.71; I <sup>2</sup> =N/A    |
|                        |                            | Overall      | RR: 1.43; 95% CI: 1.26 to 1.62; I <sup>2</sup> =0.00%  |
|                        | Sustained Pain Free 1 day  | Moderate ROB | RR: 1.73; 95% CI: 1.18 to 2.54; I <sup>2</sup> =N/A    |
|                        |                            | High ROB     | RR: 3.15; 95% CI: 1.88 to 5.28; I <sup>2</sup> =N/A    |
|                        |                            | Overall      | RR: 2.24; 95% CI: 1.65 to 3.05; I <sup>2</sup> =70.86% |
|                        | Sustained Pain Free 1 week | Moderate ROB | RR: 1.65; 95% CI: 1.08 to 2.52; I <sup>2</sup> =N/A    |
|                        |                            | High ROB     | RR: 3.10; 95% CI: 1.85 to 5.19; I <sup>2</sup> =N/A    |
|                        |                            | Overall      | RR: 2.23; 95% CI: 1.60 to 3.09; I <sup>2</sup> =71.31% |

CI = confidence interval; N/A = not applicable; RR = relative risk; ROB = risk of bias

**eTable 10.2 Subgroup analysis by route of administration for calcitonin gene-related peptide receptor antagonists**

| <b>Comparison</b>         | <b>Outcome</b>            | <b>Subgroup</b>                                        | <b>Findings</b>                                      |
|---------------------------|---------------------------|--------------------------------------------------------|------------------------------------------------------|
| Rimegepant vs. Placebo    | Pain Free 2 hours         | Oral                                                   | RR:1.71; 95% CI: 1.37 to 2.14; I <sup>2</sup> =0.00% |
|                           |                           | Sublingual                                             | RR:1.92; 95% CI: 1.48 to 2.50; I <sup>2</sup> =N/A   |
|                           | Pain Relief 2 hours       | Oral                                                   | RR:1.36; 95% CI: 1.24 to 1.50; I <sup>2</sup> =0.00% |
|                           |                           | Sublingual                                             | RR:1.35; 95% CI: 1.21 to 1.51; I <sup>2</sup> =N/A   |
|                           | Restored Function 2 hours | Oral                                                   | RR:1.40; 95% CI: 1.14 to 1.70; I <sup>2</sup> =N/A   |
|                           |                           | Sublingual                                             | RR:1.45; 95% CI: 1.22 to 1.74; I <sup>2</sup> =N/A   |
|                           | Restored Function 1 week  | Oral                                                   | RR:1.73; 95% CI: 1.39 to 2.15; I <sup>2</sup> =N/A   |
|                           |                           | Sublingual                                             | RR:1.66; 95% CI: 1.32 to 2.09; I <sup>2</sup> =N/A   |
| Sustained Pain Free 1 day | Oral                      | RR:2.24; 95% CI: 1.64 to 13.04; I <sup>2</sup> =70.86% |                                                      |
|                           | Sublingual                | RR:1.70; 95% CI: 1.46 to 1.97; I <sup>2</sup> =N/A     |                                                      |

CI = confidence interval; IV = intravenous; N/A = not applicable; RR = relative risk

**eTable 10.3. Subgroup analysis by dosage for calcitonin gene-related peptide receptor antagonists**

| Comparison                            | Outcome                        | Findings                                            |
|---------------------------------------|--------------------------------|-----------------------------------------------------|
| Rimegepant 10 mg vs. Placebo          | Pain Free at 2 hours           | RR: 1.30; 95% CI: 0.74 to 2.29; I <sup>2</sup> =N/A |
|                                       | Pain Relief at 2 hours         | RR: 1.09; 95% CI: 0.84 to 1.41; I <sup>2</sup> =N/A |
|                                       | Sustained Pain Free at 1 day   | RR: 1.62; 95% CI: 0.74 to 3.55; I <sup>2</sup> =N/A |
|                                       | Sustained Pain Free at 1 week  | RR: 1.44; 95% CI: 0.63 to 3.27; I <sup>2</sup> =N/A |
|                                       | Sustained Pain Relief at 1 day | RR: 1.19; 95% CI: 0.89 to 1.59; I <sup>2</sup> =N/A |
| Rimegepant 25 mg vs. Placebo          | Pain Free at 2 hours           | RR: 1.30; 95% CI: 0.71 to 2.40; I <sup>2</sup> =N/A |
|                                       | Pain Relief at 2 hours         | RR: 1.20; 95% CI: 0.92 to 1.55; I <sup>2</sup> =N/A |
|                                       | Sustained Pain Free at 1 day   | RR: 2.25; 95% CI: 1.06 to 4.77; I <sup>2</sup> =N/A |
|                                       | Sustained Pain Free at 1 week  | RR: 2.02; 95% CI: 0.93 to 4.41; I <sup>2</sup> =N/A |
|                                       | Sustained Pain Relief at 1 day | RR: 1.29; 95% CI: 0.96 to 1.74; I <sup>2</sup> =N/A |
| Rimegepant 75 mg vs. Placebo          | Pain Free at 2 hours           | RR: 2.19; 95% CI: 1.39 to 3.46; I <sup>2</sup> =N/A |
|                                       | Pain Relief at 2 hours         | RR: 1.50; 95% CI: 1.23 to 1.83; I <sup>2</sup> =N/A |
|                                       | Sustained Pain Free at 1 day   | RR: 4.03; 95% CI: 2.21 to 7.32; I <sup>2</sup> =N/A |
|                                       | Sustained Pain Free at 1 week  | RR: 4.03; 95% CI: 2.21 to 7.32; I <sup>2</sup> =N/A |
|                                       | Sustained Pain Relief at 1 day | RR: 1.76; 95% CI: 1.40 to 2.19; I <sup>2</sup> =N/A |
| Rimegepant 150 mg vs. Placebo         | Pain Free at 2 hours           | RR: 2.30; 95% CI: 1.47 to 3.60; I <sup>2</sup> =N/A |
|                                       | Pain Relief at 2 hours         | RR: 1.27; 95% CI: 1.01 to 1.60; I <sup>2</sup> =N/A |
|                                       | Sustained Pain Free at 1 day   | RR: 4.07; 95% CI: 2.24 to 7.40; I <sup>2</sup> =N/A |
|                                       | Sustained Pain Free at 1 week  | RR: 4.07; 95% CI: 2.24 to 7.40; I <sup>2</sup> =N/A |
|                                       | Sustained Pain Relief at 1 day | RR: 1.51; 95% CI: 1.18 to 1.93; I <sup>2</sup> =N/A |
| Rimegepant 300 mg vs. Placebo         | Pain Free at 2 hours           | RR: 2.01; 95% CI: 1.30 to 3.12; I <sup>2</sup> =N/A |
|                                       | Pain Relief at 2 hours         | RR: 1.53; 95% CI: 1.27 to 1.84; I <sup>2</sup> =N/A |
|                                       | Sustained Pain Free at 1 day   | RR: 3.66; 95% CI: 2.04 to 6.56; I <sup>2</sup> =N/A |
|                                       | Sustained Pain Free at 1 week  | RR: 3.66; 95% CI: 2.04 to 6.56; I <sup>2</sup> =N/A |
|                                       | Sustained Pain Relief at 1 day | RR: 1.83; 95% CI: 1.49 to 2.24; I <sup>2</sup> =N/A |
| Rimegepant 600 mg vs. Placebo         | Pain Free at 2 hours           | RR: 1.61; 95% CI: 0.97 to 2.67; I <sup>2</sup> =N/A |
|                                       | Pain Relief at 2 hours         | RR: 1.53; 95% CI: 1.26 to 1.86; I <sup>2</sup> =N/A |
|                                       | Sustained Pain Free at 1 day   | RR: 2.82; 95% CI: 1.47 to 5.41; I <sup>2</sup> =N/A |
|                                       | Sustained Pain Free at 1 week  | RR: 2.82; 95% CI: 1.47 to 5.41; I <sup>2</sup> =N/A |
|                                       | Sustained Pain Relief at 1 day | RR: 1.68; 95% CI: 1.34 to 2.11; I <sup>2</sup> =N/A |
| Rimegepant 25 mg vs. Rimegepant 10 mg | Pain Free at 2 hours           | RR: 1.00; 95% CI: 0.50 to 1.99; I <sup>2</sup> =N/A |
|                                       | Pain Relief at 2 hours         | RR: 1.10; 95% CI: 0.81 to 1.50; I <sup>2</sup> =N/A |
|                                       | Sustained Pain Free at 1 day   | RR: 1.39; 95% CI: 0.60 to 3.22; I <sup>2</sup> =N/A |
|                                       | Sustained Pain Free at 1 week  | RR: 1.41; 95% CI: 0.57 to 3.45; I <sup>2</sup> =N/A |

| Comparison                                | Outcome                        | Findings                                            |
|-------------------------------------------|--------------------------------|-----------------------------------------------------|
|                                           | Sustained Pain Relief at 1 day | RR: 1.09; 95% CI: 0.77 to 1.53; I <sup>2</sup> =N/A |
| Rimegepant 25 mg vs.<br>Rimegepant 150 mg | Pain Free at 2 hours           | RR: 0.57; 95% CI: 0.31 to 1.03; I <sup>2</sup> =N/A |
|                                           | Pain Relief at 2 hours         | RR: 0.94; 95% CI: 0.71 to 1.25; I <sup>2</sup> =N/A |
|                                           | Sustained Pain Free at 1 day   | RR: 0.55; 95% CI: 0.28 to 1.07; I <sup>2</sup> =N/A |
|                                           | Sustained Pain Free at 1 week  | RR: 0.50; 95% CI: 0.25 to 1.00; I <sup>2</sup> =N/A |
|                                           | Sustained Pain Relief at 1 day | RR: 0.86; 95% CI: 0.63 to 1.16; I <sup>2</sup> =N/A |
| Rimegepant 75 mg vs.<br>Rimegepant 10 mg  | Pain Free at 2 hours           | RR: 1.68; 95% CI: 0.96 to 2.94; I <sup>2</sup> =N/A |
|                                           | Pain Relief at 2 hours         | RR: 1.38; 95% CI: 1.07 to 1.78; I <sup>2</sup> =N/A |
|                                           | Sustained Pain Free at 1 day   | RR: 2.49; 95% CI: 1.23 to 5.05; I <sup>2</sup> =N/A |
|                                           | Sustained Pain Free at 1 week  | RR: 2.80; 95% CI: 1.33 to 5.89; I <sup>2</sup> =N/A |
|                                           | Sustained Pain Relief at 1 day | RR: 1.47; 95% CI: 1.12 to 1.95; I <sup>2</sup> =N/A |
| Rimegepant 75 mg vs.<br>Rimegepant 25 mg  | Pain Free at 2 hours           | RR: 1.68; 95% CI: 0.92 to 3.07; I <sup>2</sup> =N/A |
|                                           | Pain Relief at 2 hours         | RR: 1.25; 95% CI: 0.97 to 1.62; I <sup>2</sup> =N/A |
|                                           | Sustained Pain Free at 1 day   | RR: 1.79; 95% CI: 0.92 to 3.50; I <sup>2</sup> =N/A |
|                                           | Sustained Pain Free at 1 week  | RR: 1.99; 95% CI: 0.99 to 4.01; I <sup>2</sup> =N/A |
|                                           | Sustained Pain Relief at 1 day | RR: 1.36; 95% CI: 1.02 to 1.81; I <sup>2</sup> =N/A |
| Rimegepant 75 mg vs.<br>Rimegepant 150 mg | Pain Free at 2 hours           | RR: 0.95; 95% CI: 0.61 to 1.48; I <sup>2</sup> =N/A |
|                                           | Pain Relief at 2 hours         | RR: 1.18; 95% CI: 0.94 to 1.48; I <sup>2</sup> =N/A |
|                                           | Sustained Pain Free at 1 day   | RR: 0.99; 95% CI: 0.61 to 1.61; I <sup>2</sup> =N/A |
|                                           | Sustained Pain Free at 1 week  | RR: 0.99; 95% CI: 0.61 to 1.61; I <sup>2</sup> =N/A |
|                                           | Sustained Pain Relief at 1 day | RR: 1.16; 95% CI: 0.92 to 1.47; I <sup>2</sup> =N/A |
| Rimegepant 75 mg vs.<br>Rimegepant 300 mg | Pain Free at 2 hours           | RR: 1.09; 95% CI: 0.71 to 1.67; I <sup>2</sup> =N/A |
|                                           | Pain Relief at 2 hours         | RR: 0.98; 95% CI: 0.82 to 1.18; I <sup>2</sup> =N/A |
|                                           | Sustained Pain Free at 1 day   | RR: 1.10; 95% CI: 0.69 to 1.76; I <sup>2</sup> =N/A |
|                                           | Sustained Pain Free at 1 week  | RR: 1.10; 95% CI: 0.69 to 1.76; I <sup>2</sup> =N/A |
|                                           | Sustained Pain Relief at 1 day | RR: 0.96; 95% CI: 0.79 to 1.16; I <sup>2</sup> =N/A |
| Rimegepant 75 mg vs.<br>Rimegepant 600 mg | Pain Free at 2 hours           | RR: 1.36; 95% CI: 0.83 to 2.25; I <sup>2</sup> =N/A |
|                                           | Pain Relief at 2 hours         | RR: 0.98; 95% CI: 0.81 to 1.19; I <sup>2</sup> =N/A |
|                                           | Sustained Pain Free at 1 day   | RR: 1.43; 95% CI: 0.82 to 2.47; I <sup>2</sup> =N/A |
|                                           | Sustained Pain Free at 1 week  | RR: 1.43; 95% CI: 0.82 to 2.47; I <sup>2</sup> =N/A |
|                                           | Sustained Pain Relief at 1 day | RR: 1.05; 95% CI: 0.84 to 1.30; I <sup>2</sup> =N/A |
| Rimegepant 150 mg vs.<br>Rimegepant 10 mg | Pain Free at 2 hours           | RR: 1.76; 95% CI: 1.01 to 3.06; I <sup>2</sup> =N/A |
|                                           | Pain Relief at 2 hours         | RR: 1.17; 95% CI: 0.89 to 1.54; I <sup>2</sup> =N/A |
|                                           | Sustained Pain Free at 1 day   | RR: 2.52; 95% CI: 1.24 to 5.10; I <sup>2</sup> =N/A |
|                                           | Sustained Pain Free at 1 week  | RR: 2.83; 95% CI: 1.35 to 5.96; I <sup>2</sup> =N/A |
|                                           | Sustained Pain Relief at 1 day | RR: 1.27; 95% CI: 0.94 to 1.71; I <sup>2</sup> =N/A |
|                                           | Pain Free at 2 hours           | RR: 1.55; 95% CI: 0.90 to 2.66; I <sup>2</sup> =N/A |

| Comparison                                 | Outcome                        | Findings                                               |
|--------------------------------------------|--------------------------------|--------------------------------------------------------|
| Rimegepant 300 mg vs.<br>Rimegepant 10 mg  | Pain Relief at 2 hours         | RR: 1.40; 95% CI: 1.10 to 1.80; I <sup>2</sup> =N/A    |
|                                            | Sustained Pain Free at 1 day   | RR: 2.26; 95% CI: 1.13 to 4.53; I <sup>2</sup> =N/A    |
|                                            | Sustained Pain Free at 1 week  | RR: 2.55; 95% CI: 1.22 to 5.29; I <sup>2</sup> =N/A    |
|                                            | Sustained Pain Relief at 1 day | RR: 1.53; 95% CI: 1.18 to 2.00; I <sup>2</sup> =N/A    |
| Rimegepant 300 mg vs.<br>Rimegepant 25 mg  | Pain Free at 2 hours           | RR: 1.55; 95% CI: 0.86 to 2.79; I <sup>2</sup> =N/A    |
|                                            | Pain Relief at 2 hours         | RR: 1.28; 95% CI: 1.00 to 1.63; I <sup>2</sup> =N/A    |
|                                            | Sustained Pain Free at 1 day   | RR: 1.63; 95% CI: 0.85 to 3.14; I <sup>2</sup> =N/A    |
|                                            | Sustained Pain Free at 1 week  | RR: 1.81; 95% CI: 0.91 to 3.60; I <sup>2</sup> =N/A    |
| Rimegepant 300 mg vs.<br>Rimegepant 150 mg | Sustained Pain Relief at 1 day | RR: 1.41; 95% CI: 1.08 to 1.86; I <sup>2</sup> =N/A    |
|                                            | Pain Free at 2 hours           | RR: 0.88; 95% CI: 0.57 to 1.34; I <sup>2</sup> =N/A    |
|                                            | Pain Relief at 2 hours         | RR: 1.20; 95% CI: 0.97 to 1.49; I <sup>2</sup> =N/A    |
|                                            | Sustained Pain Free at 1 day   | RR: 0.90; 95% CI: 0.56 to 1.43; I <sup>2</sup> =N/A    |
| Rimegepant 300 mg vs.<br>Rimegepant 150 mg | Sustained Pain Free at 1 week  | RR: 0.90; 95% CI: 0.56 to 1.43; I <sup>2</sup> =N/A    |
|                                            | Sustained Pain Relief at 1 day | RR: 1.21; 95% CI: 0.97 to 1.50; I <sup>2</sup> =N/A    |
|                                            | Pain Free at 2 hours           | RR: 1.23; 95% CI: 0.68 to 2.25; I <sup>2</sup> =N/A    |
|                                            | Pain Relief at 2 hours         | RR: 1.41; 95% CI: 1.09 to 1.82; I <sup>2</sup> =N/A    |
| Rimegepant 600 mg vs.<br>Rimegepant 10 mg  | Sustained Pain Free at 1 day   | RR: 1.75; 95% CI: 0.82 to 3.70; I <sup>2</sup> =N/A    |
|                                            | Sustained Pain Free at 1 week  | RR: 1.96; 95% CI: 0.89 to 4.31; I <sup>2</sup> =N/A    |
|                                            | Sustained Pain Relief at 1 day | RR: 1.41; 95% CI: 1.06 to 1.87; I <sup>2</sup> =N/A    |
|                                            | Pain Free at 2 hours           | RR: 1.23; 95% CI: 0.65 to 2.34; I <sup>2</sup> =N/A    |
| Rimegepant 600 mg vs.<br>Rimegepant 25 mg  | Pain Relief at 2 hours         | RR: 1.28; 95% CI: 0.99 to 1.65; I <sup>2</sup> =N/A    |
|                                            | Sustained Pain Free at 1 day   | RR: 1.26; 95% CI: 0.61 to 2.57; I <sup>2</sup> =N/A    |
|                                            | Sustained Pain Free at 1 week  | RR: 1.40; 95% CI: 0.66 to 2.94; I <sup>2</sup> =N/A    |
|                                            | Sustained Pain Relief at 1 day | RR: 1.30; 95% CI: 0.97 to 1.74; I <sup>2</sup> =N/A    |
| Rimegepant 600 mg vs.<br>Rimegepant 150 mg | Pain Free at 2 hours           | RR: 0.70; 95% CI: 0.43 to 1.15; I <sup>2</sup> =N/A    |
|                                            | Pain Relief at 2 hours         | RR: 1.20; 95% CI: 0.96 to 1.50; I <sup>2</sup> =N/A    |
|                                            | Sustained Pain Free at 1 day   | RR: 0.69; 95% CI: 0.40 to 1.20; I <sup>2</sup> =N/A    |
|                                            | Sustained Pain Free at 1 week  | RR: 0.69; 95% CI: 0.40 to 1.20; I <sup>2</sup> =N/A    |
| Rimegepant 600 mg vs.<br>Rimegepant 150 mg | Sustained Pain Relief at 1 day | RR: 1.11; 95% CI: 0.88 to 1.41; I <sup>2</sup> =N/A    |
|                                            | Pain Free at 2 hours           | RR: 0.80; 95% CI: 0.49 to 1.29; I <sup>2</sup> =N/A    |
|                                            | Pain Relief at 2 hours         | RR: 1.00; 95% CI: 0.84 to 1.20; I <sup>2</sup> =N/A    |
|                                            | Sustained Pain Free at 1 day   | RR: 0.77; 95% CI: 0.45 to 1.31; I <sup>2</sup> =N/A    |
| Rimegepant 600 mg vs.<br>Rimegepant 300 mg | Sustained Pain Free at 1 week  | RR: 0.77; 95% CI: 0.45 to 1.31; I <sup>2</sup> =N/A    |
|                                            | Sustained Pain Relief at 1 day | RR: 0.92; 95% CI: 0.75 to 1.12; I <sup>2</sup> =N/A    |
|                                            | Pain Relief at 2 hours         | RR: 1.74; 95% CI: 1.51 to 2.00; I <sup>2</sup> =0.00%  |
|                                            | Restored Function at 2 hours   | RR: 1.69; 95% CI: 1.36 to 2.09; I <sup>2</sup> =53.80% |
|                                            | Sustained Pain Free at 1 day   | RR: 2.07; 95% CI: 1.18 to 3.65; I <sup>2</sup> =N/A    |

| Comparison                    | Outcome                         | Findings                                               |
|-------------------------------|---------------------------------|--------------------------------------------------------|
|                               | Sustained Pain Free at 1 week   | RR: 2.20; 95% CI: 1.49 to 3.23; I <sup>2</sup> =N/A    |
|                               | Sustained Pain Relief at 1 day  | RR: 1.82; 95% CI: 1.48 to 2.25; I <sup>2</sup> =N/A    |
|                               | Sustained Pain Relief at 1 week | RR: 1.87; 95% CI: 1.49 to 2.33; I <sup>2</sup> =N/A    |
| Ubrogепant 1 mg vs. Placebo   | Pain Free at 2 hours            | RR: 0.60; 95% CI: 0.23 to 1.62; I <sup>2</sup> =N/A    |
|                               | Pain Relief at 2 hours          | RR: 0.81; 95% CI: 0.57 to 1.14; I <sup>2</sup> =N/A    |
|                               | Sustained Pain Free at 1 day    | RR: 0.72; 95% CI: 0.23 to 2.21; I <sup>2</sup> =N/A    |
|                               | Sustained Pain Free at 1 week   | RR: 0.72; 95% CI: 0.23 to 2.21; I <sup>2</sup> =N/A    |
|                               | Sustained Pain Relief at 1 day  | RR: 0.60; 95% CI: 0.36 to 1.00; I <sup>2</sup> =N/A    |
|                               | Sustained Pain Relief at 1 week | RR: 0.65; 95% CI: 0.38 to 1.11; I <sup>2</sup> =N/A    |
| Ubrogепant 10 mg vs. Placebo  | Pain Free at 2 hours            | RR: 1.60; 95% CI: 0.75 to 3.40; I <sup>2</sup> =N/A    |
|                               | Pain Relief at 2 hours          | RR: 1.14; 95% CI: 0.85 to 1.54; I <sup>2</sup> =N/A    |
|                               | Sustained Pain Free at 1 day    | RR: 1.43; 95% CI: 0.56 to 3.65; I <sup>2</sup> =N/A    |
|                               | Sustained Pain Free at 1 week   | RR: 1.43; 95% CI: 0.56 to 3.65; I <sup>2</sup> =N/A    |
|                               | Sustained Pain Relief at 1 day  | RR: 1.22; 95% CI: 0.81 to 1.83; I <sup>2</sup> =N/A    |
|                               | Sustained Pain Relief at 1 week | RR: 1.25; 95% CI: 0.81 to 1.94; I <sup>2</sup> =N/A    |
| Ubrogепant 25 mg vs. Placebo  | Pain Free at 2 hours            | RR: 1.50; 95% CI: 1.14 to 1.97; I <sup>2</sup> =27.20% |
|                               | Pain Relief at 2 hours          | RR: 1.18; 95% CI: 1.04 to 1.34; I <sup>2</sup> =0.00%  |
|                               | Pain Relief at 1 day            | RR: 1.49; 95% CI: 1.18 to 1.88; I <sup>2</sup> =N/A    |
|                               | Restored Function at 2 hours    | RR: 1.19; 95% CI: 1.00 to 1.42; I <sup>2</sup> =N/A    |
|                               | Restores Function at 1 day      | RR: 1.13; 95% CI: 1.01 to 1.26; I <sup>2</sup> =N/A    |
|                               | Sustained Pain Free at 1 day    | RR: 1.60; 95% CI: 1.11 to 2.29; I <sup>2</sup> =0.00%  |
|                               | Sustained Pain Free at 1 week   | RR: 2.14; 95% CI: 0.90 to 5.09; I <sup>2</sup> =N/A    |
|                               | Sustained Pain Relief at 1 day  | RR: 1.28; 95% CI: 0.86 to 1.91; I <sup>2</sup> =N/A    |
|                               | Sustained Pain Relief at 1 week | RR: 1.39; 95% CI: 0.91 to 2.13; I <sup>2</sup> =N/A    |
| Ubrogепant 50 mg vs. Placebo  | Pain Free at 2 hours            | RR: 1.59; 95% CI: 1.29 to 1.95; I <sup>2</sup> =0.00%  |
|                               | Pain Relief at 2 hours          | RR: 1.23; 95% CI: 1.13 to 1.35; I <sup>2</sup> =10.90% |
|                               | Pain Relief at 1 day            | RR: 1.78; 95% CI: 1.42 to 2.23; I <sup>2</sup> =N/A    |
|                               | Restored Function at 2 hours    | RR: 1.23; 95% CI: 1.08 to 1.40; I <sup>2</sup> =0.00%  |
|                               | Restores Function at 1 day      | RR: 1.18; 95% CI: 1.10 to 1.28; I <sup>2</sup> =0.00%  |
|                               | Sustained Pain Free at 1 day    | RR: 1.63; 95% CI: 1.26 to 2.12; I <sup>2</sup> =0.00%  |
|                               | Sustained Pain Free at 1 week   | RR: 2.14; 95% CI: 0.90 to 5.09; I <sup>2</sup> =N/A    |
|                               | Sustained Pain Relief at 1 day  | RR: 1.59; 95% CI: 1.30 to 1.94; I <sup>2</sup> =0.00%  |
|                               | Sustained Pain Relief at 1 week | RR: 1.61; 95% CI: 1.07 to 2.42; I <sup>2</sup> =N/A    |
| Ubrogепant 100 mg vs. Placebo | Pain Free at 2 hours            | RR: 1.89; 95% CI: 1.43 to 2.52; I <sup>2</sup> =0.00%  |
|                               | Pain Relief at 2 hours          | RR: 1.22; 95% CI: 1.09 to 1.38; I <sup>2</sup> =0.00%  |
|                               | Restored Function at 2 hours    | RR: 1.42; 95% CI: 1.18 to 1.71; I <sup>2</sup> =N/A    |
|                               | Restored Function at 1 day      | RR: 1.16; 95% CI: 1.05 to 1.29; I <sup>2</sup> =N/A    |

| Comparison                             | Outcome                         | Findings                                               |
|----------------------------------------|---------------------------------|--------------------------------------------------------|
|                                        | Sustained Pain Free at 1 day    | RR: 1.96; 95% CI: 1.40 to 2.75; I <sup>2</sup> =37.20% |
|                                        | Sustained Pain Free at 1 week   | RR: 2.98; 95% CI: 1.31 to 6.78; I <sup>2</sup> =N/A    |
|                                        | Sustained Pain Relief at 1 day  | RR: 1.70; 95% CI: 1.40 to 2.06; I <sup>2</sup> =0.00%  |
|                                        | Sustained Pain Relief at 1 week | RR: 1.56; 95% CI: 1.03 to 2.35; I <sup>2</sup> =N/A    |
| Ubrogepant 10 mg vs. Ubrogepant 1 mg   | Pain Free at 2 hours            | RR: 2.65; 95% CI: 1.07 to 6.57; I <sup>2</sup> =N/A    |
|                                        | Pain Relief at 2 hours          | RR: 1.41; 95% CI: 1.02 to 1.97; I <sup>2</sup> =N/A    |
|                                        | Sustained Pain Free at 1 day    | RR: 1.99; 95% CI: 0.70 to 5.66; I <sup>2</sup> =N/A    |
|                                        | Sustained Pain Free at 1 week   | RR: 1.99; 95% CI: 0.70 to 5.66; I <sup>2</sup> =N/A    |
|                                        | Sustained Pain Relief at 1 day  | RR: 2.04; 95% CI: 1.24 to 3.34; I <sup>2</sup> =N/A    |
|                                        | Sustained Pain Relief at 1 week | RR: 1.93; 95% CI: 1.15 to 3.24; I <sup>2</sup> =N/A    |
| Ubrogepant 25 mg vs. Ubrogepant 1 mg   | Pain Free at 2 hours            | RR: 3.64; 95% CI: 1.52 to 8.70; I <sup>2</sup> =N/A    |
|                                        | Pain Relief at 2 hours          | RR: 1.37; 95% CI: 0.98 to 1.90; I <sup>2</sup> =N/A    |
|                                        | Sustained Pain Free at 1 day    | RR: 2.98; 95% CI: 1.11 to 7.97; I <sup>2</sup> =N/A    |
|                                        | Sustained Pain Free at 1 week   | RR: 2.98; 95% CI: 1.11 to 7.97; I <sup>2</sup> =N/A    |
|                                        | Sustained Pain Relief at 1 day  | RR: 2.14; 95% CI: 1.31 to 3.50; I <sup>2</sup> =N/A    |
|                                        | Sustained Pain Relief at 1 week | RR: 2.15; 95% CI: 1.30 to 3.57; I <sup>2</sup> =N/A    |
| Ubrogepant 25 mg vs. Ubrogepant 10 mg  | Pain Free at 2 hours            | RR: 1.38; 95% CI: 0.75 to 2.50; I <sup>2</sup> =N/A    |
|                                        | Pain Relief at 2 hours          | RR: 0.96; 95% CI: 0.72 to 1.28; I <sup>2</sup> =N/A    |
|                                        | Sustained Pain Free at 1 day    | RR: 1.50; 95% CI: 0.70 to 3.22; I <sup>2</sup> =N/A    |
|                                        | Sustained Pain Free at 1 week   | RR: 1.50; 95% CI: 0.70 to 3.22; I <sup>2</sup> =N/A    |
|                                        | Sustained Pain Relief at 1 day  | RR: 1.05; 95% CI: 0.73 to 1.52; I <sup>2</sup> =N/A    |
|                                        | Sustained Pain Relief at 1 week | RR: 1.11; 95% CI: 0.75 to 1.65; I <sup>2</sup> =N/A    |
| Ubrogepant 25 mg vs. Ubrogepant 100 mg | Pain Free at 2 hours            | RR: 0.85; 95% CI: 0.51 to 1.43; I <sup>2</sup> =N/A    |
|                                        | Pain Relief at 2 hours          | RR: 0.92; 95% CI: 0.70 to 1.22; I <sup>2</sup> =N/A    |
|                                        | Sustained Pain Free at 1 day    | RR: 0.69; 95% CI: 0.37 to 1.27; I <sup>2</sup> =N/A    |
|                                        | Sustained Pain Free at 1 week   | RR: 0.72; 95% CI: 0.39 to 1.34; I <sup>2</sup> =N/A    |
|                                        | Sustained Pain Relief at 1 day  | RR: 0.88; 95% CI: 0.62 to 1.24; I <sup>2</sup> =N/A    |
|                                        | Sustained Pain Relief at 1 week | RR: 0.89; 95% CI: 0.62 to 1.28; I <sup>2</sup> =N/A    |
| Ubrogepant 50 mg vs. Ubrogepant 1 mg   | Pain Free at 2 hours            | RR: 3.64; 95% CI: 1.52 to 8.70; I <sup>2</sup> =N/A    |
|                                        | Pain Relief at 2 hours          | RR: 1.49; 95% CI: 1.08 to 2.06; I <sup>2</sup> =N/A    |
|                                        | Sustained Pain Free at 1 day    | RR: 3.18; 95% CI: 1.20 to 8.43; I <sup>2</sup> =N/A    |
|                                        | Sustained Pain Free at 1 week   | RR: 2.98; 95% CI: 1.11 to 7.97; I <sup>2</sup> =N/A    |
|                                        | Sustained Pain Relief at 1 day  | RR: 2.51; 95% CI: 1.56 to 4.04; I <sup>2</sup> =N/A    |
|                                        | Sustained Pain Relief at 1 week | RR: 2.48; 95% CI: 1.52 to 4.06; I <sup>2</sup> =N/A    |
| Ubrogepant 50 mg vs. Ubrogepant 10 mg  | Pain Free at 2 hours            | RR: 1.38; 95% CI: 0.75 to 2.50; I <sup>2</sup> =N/A    |
|                                        | Pain Relief at 2 hours          | RR: 1.05; 95% CI: 0.80 to 1.39; I <sup>2</sup> =N/A    |
|                                        | Sustained Pain Free at 1 day    | RR: 1.60; 95% CI: 0.75 to 3.40; I <sup>2</sup> =N/A    |

| Comparison                             | Outcome                         | Findings                                              |
|----------------------------------------|---------------------------------|-------------------------------------------------------|
|                                        | Sustained Pain Free at 1 week   | RR: 1.50; 95% CI: 0.70 to 3.22; I <sup>2</sup> =N/A   |
|                                        | Sustained Pain Relief at 1 day  | RR: 1.23; 95% CI: 0.87 to 1.75; I <sup>2</sup> =N/A   |
|                                        | Sustained Pain Relief at 1 week | RR: 1.29; 95% CI: 0.88 to 1.87; I <sup>2</sup> =N/A   |
| Ubrogepant 50 mg vs. Ubrogepant 25 mg  | Pain Free at 2 hours            | RR: 1.10; 95% CI: 0.87 to 1.39; I <sup>2</sup> =0.00% |
|                                        | Pain Relief at 2 hours          | RR: 1.10; 95% CI: 0.99 to 1.23; I <sup>2</sup> =0.00% |
|                                        | Pain Relief at 1 day            | RR: 1.19; 95% CI: 0.98 to 1.45; I <sup>2</sup> =N/A   |
|                                        | Restored Function at 2 hours    | RR: 1.01; 95% CI: 0.86 to 1.20; I <sup>2</sup> =N/A   |
|                                        | Restored Function at 1 day      | RR: 1.09; 95% CI: 0.99 to 1.20; I <sup>2</sup> =N/A   |
|                                        | Sustained Pain Free at 1 day    | RR: 1.17; 95% CI: 0.87 to 1.58; I <sup>2</sup> =0.00% |
|                                        | Sustained Pain Free at 1 week   | RR: 1.00; 95% CI: 0.51 to 1.97; I <sup>2</sup> =N/A   |
|                                        | Sustained Pain Relief at 1 week | RR: 1.15; 95% CI: 0.81 to 1.65; I <sup>2</sup> =N/A   |
| Ubrogepant 50 mg vs. Ubrogepant 100 mg | Pain Free at 2 hours            | RR: 0.85; 95% CI: 0.67 to 1.09; I <sup>2</sup> =0.00% |
|                                        | Pain Relief at 2 hours          | RR: 0.95; 95% CI: 0.85 to 1.06; I <sup>2</sup> =0.00% |
|                                        | Restored Function at 2 hours    | RR: 0.89; 95% CI: 0.75 to 1.05; I <sup>2</sup> =N/A   |
|                                        | Restores Function at 1 day      | RR: 0.98; 95% CI: 0.89 to 1.08; I <sup>2</sup> =N/A   |
|                                        | Sustained Pain Free at 1 day    | RR: 0.77; 95% CI: 0.57 to 1.03; I <sup>2</sup> =0.00% |
|                                        | Sustained Pain Free at 1 week   | RR: 0.72; 95% CI: 0.39 to 1.34; I <sup>2</sup> =N/A   |
|                                        | Sustained Pain Relief at 1 week | RR: 1.03; 95% CI: 0.73 to 1.45; I <sup>2</sup> =N/A   |
| Ubrogepant 100 mg vs. Ubrogepant 1 mg  | Pain Free at 2 hours            | RR: 4.27; 95% CI: 1.81 to 10.05; I <sup>2</sup> =N/A  |
|                                        | Pain Relief at 2 hours          | RR: 1.48; 95% CI: 1.07 to 2.04; I <sup>2</sup> =N/A   |
|                                        | Sustained Pain Free at 1 day    | RR: 4.34; 95% CI: 1.69 to 11.13; I <sup>2</sup> =N/A  |
|                                        | Sustained Pain Free at 1 week   | RR: 4.14; 95% CI: 1.61 to 10.67; I <sup>2</sup> =N/A  |
|                                        | Sustained Pain Relief at 1 week | RR: 2.44; 95% CI: 1.51 to 3.93; I <sup>2</sup> =N/A   |
| Ubrogepant 100 mg vs. Ubrogepant 10 mg | Pain Free at 2 hours            | RR: 1.61; 95% CI: 0.91 to 2.87; I <sup>2</sup> =N/A   |
|                                        | Pain Relief at 2 hours          | RR: 1.05; 95% CI: 0.79 to 1.38; I <sup>2</sup> =N/A   |
|                                        | Sustained Pain Free at 1 day    | RR: 2.18; 95% CI: 1.07 to 4.44; I <sup>2</sup> =N/A   |
|                                        | Sustained Pain Free at 1 week   | RR: 2.09; 95% CI: 1.02 to 4.26; I <sup>2</sup> =N/A   |
|                                        | Sustained Pain Relief at 1 week | RR: 1.25; 95% CI: 0.86 to 1.82; I <sup>2</sup> =N/A   |

CI = confidence interval; kg = kilograms; mg = milligrams; N/A = not applicable; RR = risk ratio; ug = micrograms



**eTable 10.4 Subgroup analysis by risk of bias for 5-HT1F receptor agonist**

| Comparison             | Outcome                   | Risk of Bias | Findings                                               |
|------------------------|---------------------------|--------------|--------------------------------------------------------|
| Lasmiditan vs. Placebo | Pain Free 2 hours         | Low ROB      | RR: 1.54; 95% CI: 1.29 to 1.83; I <sup>2</sup> =0.00%  |
|                        |                           | Moderate ROB | RR: 1.92; 95% CI: 1.53 to 2.42; I <sup>2</sup> =N/A    |
|                        |                           | High ROB     | RR: 3.18; 95% CI: 2.28 to 4.43; I <sup>2</sup> =N/A    |
|                        |                           | Overall      | RR: 1.95; 95% CI: 1.25 to 3.04; I <sup>2</sup> =75.60% |
|                        | Pain Relief 2 hours       | Low ROB      | RR: 1.35; 95% CI: 1.23 to 1.49; I <sup>2</sup> =51.20% |
|                        |                           | Moderate ROB | RR: 1.41; 95% CI: 1.25 to 1.59; I <sup>2</sup> =N/A    |
|                        |                           | High ROB     | RR: 1.52; 95% CI: 1.34 to 1.74; I <sup>2</sup> =N/A    |
|                        |                           | Overall      | RR: 1.42; 95% CI: 1.23 to 1.63; I <sup>2</sup> =38.90% |
|                        | Restored Function 2 hours | Low ROB      | RR: 1.35; 95% CI: 1.15 to 1.60; I <sup>2</sup> =N/A    |
|                        |                           | Moderate ROB | RR: 1.51; 95% CI: 1.25 to 1.82; I <sup>2</sup> =N/A    |
|                        |                           | High ROB     | RR: 1.95; 95% CI: 1.42 to 2.70; I <sup>2</sup> =N/A    |
|                        |                           | Overall      | RR: 1.49; 95% CI: 1.42 to 1.67; I <sup>2</sup> =50.30% |

CI = confidence interval; N/A = not applicable; RR = relative risk; ROB = risk of bias; SMD = standardized mean difference

**eTable 10.5 Subgroup analysis by route of administration for 5-HT<sub>1F</sub> receptor agonist**

| Comparison             | Outcome                   | Subgroup | Findings                                              |
|------------------------|---------------------------|----------|-------------------------------------------------------|
| Lasmiditan vs. Placebo | Pain Free 2 hours         | IV       | RR:1.18; 95% CI: 0.57 to 2.48; I <sup>2</sup> =N/A    |
|                        |                           | Oral     | RR:2.08; 95% CI: 1.20 to 3.60; I <sup>2</sup> =80.00% |
|                        | Pain Relief 2 hours       | IV       | RR:1.23; 95% CI: 0.84 to 1.80; I <sup>2</sup> =N/A    |
|                        |                           | Oral     | RR:1.43; 95% CI: 1.19 to 1.72; I <sup>2</sup> =50.70% |
|                        | Sustained Pain Free 1 day | IV       | RR:0.82; 95% CI: 0.35 to 1.93; I <sup>2</sup> =N/A    |
|                        |                           | Oral     | RR:1.79; 95% CI: 1.46 to 2.21; I <sup>2</sup> =91.20% |

CI = confidence interval; IV = intravenous; N/A = not applicable; RR = relative risk

**eTable 10.6 Subgroup analysis by age for 5-HT<sub>1F</sub> receptor agonist**

| Comparison                    | Outcome              | Subgroup   | Findings*                                           |
|-------------------------------|----------------------|------------|-----------------------------------------------------|
| Lasmiditan 50 mg vs. Placebo  | Pain Free at 2 hours | < 65 years | OR: 1.38; 95% CI: 1.07 to 1.78; I <sup>2</sup> =N/A |
|                               |                      | ≥ 65 years | OR: 0.90; 95% CI: 0.30 to 2.84; I <sup>2</sup> =N/A |
| Lasmiditan 100 mg vs. Placebo | Pain Free at 2 hours | < 65 years | OR: 1.67; 95% CI: 1.40 to 2.01; I <sup>2</sup> =N/A |
|                               |                      | ≥ 65 years | OR: 0.79; 95% CI: 0.33 to 1.95; I <sup>2</sup> =N/A |
| Lasmiditan 200 mg vs. Placebo | Pain Free at 2 hours | < 65 years | OR: 1.75; 95% CI: 1.46 to 2.09; I <sup>2</sup> =N/A |
|                               |                      | ≥ 65 years | OR: 1.56; 95% CI: 0.52 to 4.58; I <sup>2</sup> =N/A |

CI = confidence interval; N/A = not applicable; OR = odds ratio

\* Tepper et al.<sup>134</sup> reported OR instead of RR. No conversion to RR was made.

**eTable 10.7 Subgroup analysis by gender for 5-HT<sub>1F</sub> receptor agonist**

| Comparison                    | Outcome              | Subgroup | Findings*                                           |
|-------------------------------|----------------------|----------|-----------------------------------------------------|
| Lasmiditan 50 mg vs. Placebo  | Pain Free at 2 hours | Female   | OR: 1.48; 95% CI: 1.15 to 1.93; I <sup>2</sup> =N/A |
|                               |                      | Male     | OR: 0.79; 95% CI: 0.41 to 1.48; I <sup>2</sup> =N/A |
| Lasmiditan 100 mg vs. Placebo | Pain Free at 2 hours | Female   | OR: 1.59; 95% CI: 1.31 to 1.92; I <sup>2</sup> =N/A |
|                               |                      | Male     | OR: 1.96; 95% CI: 1.26 to 3.09; I <sup>2</sup> =N/A |
| Lasmiditan 200 mg vs. Placebo | Pain Free at 2 hours | Female   | OR: 1.75; 95% CI: 1.45 to 2.12; I <sup>2</sup> =N/A |
|                               |                      | Male     | OR: 1.59; 95% CI: 1.01 to 2.48; I <sup>2</sup> =N/A |

CI = confidence interval; N/A = not applicable; OR = odds ratio

\* Tepper et al.<sup>134</sup> reported OR instead of RR. No conversion to RR was made.

**eTable 10.8 Subgroup analysis by race for 5-HT<sub>1F</sub> receptor agonist**

| Comparison                    | Outcome              | Subgroup*     | Findings*                                           |
|-------------------------------|----------------------|---------------|-----------------------------------------------------|
| Lasmiditan 50 mg vs. Placebo  | Pain Free at 2 hours | Caucasian     | OR: 1.51; 95% CI: 1.10 to 1.90; I <sup>2</sup> =N/A |
|                               |                      | non-Caucasian | OR: 0.99; 95% CI: 0.62 to 1.71; I <sup>2</sup> =N/A |
| Lasmiditan 100 mg vs. Placebo | Pain Free at 2 hours | Caucasian     | OR: 1.79; 95% CI: 1.51 to 2.20; I <sup>2</sup> =N/A |
|                               |                      | non-Caucasian | OR: 1.09; 95% CI: 0.71 to 1.49; I <sup>2</sup> =N/A |
| Lasmiditan 200 mg vs. Placebo | Pain Free at 2 hours | Caucasian     | OR: 2.00; 95% CI: 1.59 to 2.39; I <sup>2</sup> =N/A |
|                               |                      | non-Caucasian | OR: 0.99; 95% CI: 0.71 to 1.51; I <sup>2</sup> =N/A |

CI = confidence interval; N/A = not applicable; OR = odds ratio

\* Tepper et al.<sup>134</sup> reported OR instead of RR. No conversion to RR was made.

**eTable 10.9 Subgroup analysis by body mass index for 5-HT<sub>1F</sub> receptor agonist**

| <b>Comparison</b>             | <b>Outcome</b>       | <b>Subgroup*</b>       | <b>Findings*</b>                                    |
|-------------------------------|----------------------|------------------------|-----------------------------------------------------|
| Lasmiditan 50 mg vs. Placebo  | Pain Free at 2 hours | ≥ 30 kg/m <sup>2</sup> | OR: 1.15; 95% CI: 0.79 to 1.65; I <sup>2</sup> =N/A |
|                               |                      | < 30 kg/m <sup>2</sup> | OR: 0.99; 95% CI: 0.62 to 1.71; I <sup>2</sup> =N/A |
| Lasmiditan 100 mg vs. Placebo | Pain Free at 2 hours | ≥ 30 kg/m <sup>2</sup> | OR: 1.53; 95% CI: 1.18 to 1.98; I <sup>2</sup> =N/A |
|                               |                      | < 30 kg/m <sup>2</sup> | OR: 1.73; 95% CI: 1.37 to 2.20; I <sup>2</sup> =N/A |
| Lasmiditan 200 mg vs. Placebo | Pain Free at 2 hours | ≥ 30 kg/m <sup>2</sup> | OR: 1.60; 95% CI: 1.21 to 2.06; I <sup>2</sup> =N/A |
|                               |                      | < 30 kg/m <sup>2</sup> | OR: 1.85; 95% CI: 1.45 to 2.34; I <sup>2</sup> =N/A |

CI = confidence interval; N/A = not applicable; OR = odds ratio

\* Tepper et al.<sup>134</sup> reported OR instead of RR. No conversion to RR was made.

**eTable 10.10 Subgroup analysis by prior response to triptans for 5-HT<sub>1F</sub> receptor agonist**

| Comparison             | Outcome                | Subgroup*     | Findings                                            |
|------------------------|------------------------|---------------|-----------------------------------------------------|
| Lasmiditan vs. Placebo | Pain Free at 2 hours   | Triptan-naive | RR: 2.01; 95% CI: 1.52 to 2.67; I <sup>2</sup> =N/A |
|                        |                        | Good          | RR: 2.28; 95% CI: 1.47 to 3.53; I <sup>2</sup> =N/A |
|                        |                        | Insufficient  | RR: 1.52; 95% CI: 1.29 to 1.80; I <sup>2</sup> =N/A |
|                        | Pain Relief at 2 hours | Triptan-naive | RR: 1.59; 95% CI: 1.39 to 1.83; I <sup>2</sup> =N/A |
|                        |                        | Good          | RR: 1.47; 95% CI: 1.20 to 1.79; I <sup>2</sup> =N/A |
|                        |                        | Insufficient  | RR: 1.24; 95% CI: 1.13 to 1.36; I <sup>2</sup> =N/A |

CI = confidence interval; N/A = not applicable; RR = relative risk

\* An overall response of “good” or “poor/none” to the most recent use of triptan at baseline were defined as “good” or “insufficient”.

**eTable 10.11 Subgroup analysis by dosage compare for 5-HT1F receptor agonist**

| <b>Comparison</b>             | <b>Outcome</b>                 | <b>Findings</b>                                       |
|-------------------------------|--------------------------------|-------------------------------------------------------|
| Lasmiditan 2.5 mg vs. Placebo | Pain Free at 2 hours           | RR: 0.50; 95% CI: 0.03 to 7.51; I <sup>2</sup> = N/A  |
|                               | Pain Relief at 2 hours         | RR: 1.10; 95% CI: 0.39 to 3.11; I <sup>2</sup> =N/A   |
|                               | Sustained Pain Free at 1 day   | RR: 0.57; 95% CI: 0.03 to 8.60; I <sup>2</sup> =N/A   |
|                               | Sustained Pain Relief at 1 day | RR: 2.42; 95% CI: 1.17 to 4.99; I <sup>2</sup> =N/A   |
| Lasmiditan 5 mg vs. Placebo   | Pain Free at 2 hours           | RR: 0.19; 95% CI: 0.01 to 3.14; I <sup>2</sup> =N/A   |
|                               | Pain Relief at 2 hours         | RR: 0.37; 95% CI: 0.09 to 1.36; I <sup>2</sup> =N/A   |
|                               | Sustained Pain Free at 1 day   | RR: 0.22; 95% CI: 0.01 to 3.61; I <sup>2</sup> =N/A   |
|                               | Sustained Pain Relief at 1 day | RR: 1.07; 95% CI: 0.42 to 2.69; I <sup>2</sup> =N/A   |
| Lasmiditan 10 mg vs. Placebo  | Pain Free at 2 hours           | RR: 1.09; 95% CI: 0.40 to 2.97; I <sup>2</sup> =N/A   |
|                               | Pain Relief at 2 hours         | RR: 1.19; 95% CI: 0.73 to 1.96; I <sup>2</sup> =N/A   |
|                               | Sustained Pain Free at 1 day   | RR: 0.75; 95% CI: 0.21 to 2.63; I <sup>2</sup> =N/A   |
|                               | Sustained Pain Relief at 1 day | RR: 1.75; 95% CI: 0.97 to 3.13; I <sup>2</sup> =N/A   |
| Lasmiditan 20 mg vs. Placebo  | Pain Free at 2 hours           | RR: 1.50; 95% CI: 0.64 to 3.53; I <sup>2</sup> =N/A   |
|                               | Pain Relief at 2 hours         | RR: 1.42; 95% CI: 0.92 to 2.19; I <sup>2</sup> =N/A   |
|                               | Sustained Pain Free at 1 day   | RR: 1.07; 95% CI: 0.37 to 3.04; I <sup>2</sup> =N/A   |
|                               | Sustained Pain Relief at 1 day | RR: 1.84; 95% CI: 1.06 to 3.21; I <sup>2</sup> =N/A   |
| Lasmiditan 30 mg vs. Placebo  | Pain Free at 2 hours           | RR: 1.97; 95% CI: 0.81 to 4.78; I <sup>2</sup> = N/A  |
|                               | Pain Relief at 2 hours         | RR: 1.52; 95% CI: 0.95 to 2.42; I <sup>2</sup> =N/A   |
|                               | Sustained Pain Free at 1 day   | RR: 1.12; 95% CI: 0.33 to 3.82; I <sup>2</sup> =N/A   |
|                               | Sustained Pain Relief at 1 day | RR: 2.22; 95% CI: 1.26 to 3.88; I <sup>2</sup> =N/A   |
| Lasmiditan 45 mg vs. Placebo  | Pain Free at 2 hours           | RR: 1.31; 95% CI: 0.21 to 8.01; I <sup>2</sup> =N/A   |
|                               | Pain Relief at 2 hours         | RR: 1.65; 95% CI: 0.86 to 3.19; I <sup>2</sup> =N/A   |
|                               | Sustained Pain Free at 1 day   | RR: 1.50; 95% CI: 0.24 to 9.32; I <sup>2</sup> =N/A   |
|                               | Sustained Pain Relief at 1 day | RR: 0.80; 95% CI: 0.13 to 4.67; I <sup>2</sup> =N/A   |
| Lasmiditan 50 mg vs. Placebo  | Function Scale at 2 hours      | SMD: 1.13; 95% CI: 0.84 to 1.43; I <sup>2</sup> =N/A  |
|                               | Pain Free at 2 hours           | RR: 1.39; 95% CI: 1.13 to 1.72; I <sup>2</sup> =0.00% |
|                               | Pain Relief at 2 hours         | RR: 1.30; 95% CI: 1.16 to 1.46; I <sup>2</sup> =0.00% |
|                               | Pain Scale at 2 hours          | SMD: 1.04; 95% CI: 0.75 to 1.34; I <sup>2</sup> =N/A  |
|                               | Restored Function at 2 hours   | RR: 1.29; 95% CI: 1.07 to 1.57; I <sup>2</sup> =N/A   |
|                               | Sustained Pain Free at 1 day   | RR: 1.32; 95% CI: 1.01 to 1.75; I <sup>2</sup> =N/A   |
|                               | Sustained Pain Free at 1 week  | RR: 1.29; 95% CI: 0.96 to 1.75; I <sup>2</sup> =N/A   |
|                               | Function Scale at 2 hours      | SMD: 1.74; 95% CI: 1.42 to 2.06; I <sup>2</sup> =N/A  |



| Comparison                             | Outcome                        | Findings                                               |
|----------------------------------------|--------------------------------|--------------------------------------------------------|
| Lasmiditan 100 mg vs. Placebo          | Pain Free at 2 hours           | RR: 1.78; 95% CI: 1.54 to 2.07; I <sup>2</sup> =73.81% |
|                                        | Pain Free at 1 day             | RR: 1.79; 95% CI: 1.51 to 2.11; I <sup>2</sup> =N/A    |
|                                        | Pain Relief at 2 hours         | RR: 1.44; 95% CI: 1.33 to 1.55; I <sup>2</sup> =62.23% |
|                                        | Pain Relief at 1 day           | RR: 1.16; 95% CI: 1.06 to 1.27; I <sup>2</sup> =N/A    |
|                                        | Pain Scale at 2 hours          | SMD: 0.57; 95% CI: 0.30 to 0.85; I <sup>2</sup> =N/A   |
|                                        | Restored Function at 2 hours   | RR: 1.48; 95% CI: 1.30 to 1.68; I <sup>2</sup> =28.15% |
|                                        | Sustained Pain Free at 1 day   | RR: 1.64; 95% CI: 1.29 to 2.08; I <sup>2</sup> =87.56% |
|                                        | Sustained Pain Free at 1 week  | RR: 1.42; 95% CI: 1.09 to 1.85; I <sup>2</sup> =60.31% |
| Lasmiditan 200 mg vs. Placebo          | Sustained Pain Relief at 1 day | RR: 1.97; 95% CI: 1.38 to 2.82; I <sup>2</sup> =N/A    |
|                                        | Function Scale at 2 hours      | SMD: 8.46; 95% CI: 7.59 to 9.34; I <sup>2</sup> =N/A   |
|                                        | Pain Free at 2 hours           | RR: 2.14; 95% CI: 1.86 to 2.46; I <sup>2</sup> =72.52% |
|                                        | Pain Free at 1 day             | RR: 1.83; 95% CI: 1.55 to 2.16; I <sup>2</sup> =N/A    |
|                                        | Pain Relief at 2 hours         | RR: 1.42; 95% CI: 1.32 to 1.53; I <sup>2</sup> =17.28% |
|                                        | Pain Relief at 1 day           | RR: 1.27; 95% CI: 1.17 to 1.39; I <sup>2</sup> =N/A    |
|                                        | Pain Scale at 2 hours          | SMD: 7.11; 95% CI: 6.36 to 7.85; I <sup>2</sup> =N/A   |
|                                        | Restored Function at 2 hours   | RR: 1.55; 95% CI: 1.36 to 1.76; I <sup>2</sup> =36.98% |
|                                        | Sustained Pain Free at 1 day   | RR: 2.10; 95% CI: 1.67 to 2.63; I <sup>2</sup> =89.87% |
|                                        | Sustained Pain Free at 1 week  | RR: 2.03; 95% CI: 1.59 to 2.59; I <sup>2</sup> =86.50% |
| Lasmiditan 400 mg vs. Placebo          | Sustained Pain Relief at 1 day | RR: 2.44; 95% CI: 1.73 to 3.45; I <sup>2</sup> =N/A    |
|                                        | Function Scale at 2 hours      | SMD: 10.15; 95% CI: 9.12 to 11.18; I <sup>2</sup> =N/A |
|                                        | Pain Free at 2 hours           | RR: 3.29; 95% CI: 1.37 to 7.91; I <sup>2</sup> =N/A    |
|                                        | Pain Relief at 2 hours         | RR: 2.18; 95% CI: 1.40 to 3.38; I <sup>2</sup> =N/A    |
| Lasmiditan 2.5 mg vs. Lasmiditan 10 mg | Pain Scale at 2 hours          | SMD: 8.14; 95% CI: 7.30 to 8.98; I <sup>2</sup> =N/A   |
|                                        | Pain Free at 2 hours           | RR: 0.45; 95% CI: 0.03 to 6.97; I <sup>2</sup> =N/A    |
|                                        | Pain Relief at 2 hours         | RR: 0.92; 95% CI: 0.32 to 2.63; I <sup>2</sup> =N/A    |
|                                        | Sustained Pain Free at 1 day   | RR: 0.71; 95% CI: 0.04 to 11.78; I <sup>2</sup> =N/A   |
| Lasmiditan 5 mg vs. Lasmiditan 2.5 mg  | Sustained Pain Relief at 1 day | RR: 1.38; 95% CI: 0.70 to 2.71; I <sup>2</sup> =N/A    |
|                                        | Sustained Pain Relief at 1 day | RR: 0.44; 95% CI: 0.16 to 1.18; I <sup>2</sup> = N/A   |
| Lasmiditan 5 mg vs. Lasmiditan 10 mg   | Sustained Pain Relief at 1 day | RR: 0.17; 95% CI: 0.01 to 2.92; I <sup>2</sup> =N/A    |
|                                        | Pain Free at 2 hours           | RR: 0.31; 95% CI: 0.08 to 1.15; I <sup>2</sup> =N/A    |
|                                        | Pain Relief at 2 hours         | RR: 0.27; 95% CI: 0.01 to 4.92; I <sup>2</sup> =N/A    |
|                                        | Sustained Pain Relief at 1 day | RR: 0.61; 95% CI: 0.25 to 1.48; I <sup>2</sup> =N/A    |

| Comparison                                | Outcome                        | Findings                                             |
|-------------------------------------------|--------------------------------|------------------------------------------------------|
| Lasmiditan 5 mg vs.<br>Lasmiditan 20 mg   | Pain Free at 2 hours           | RR: 0.13; 95% CI: 0.01 to 2.10; I <sup>2</sup> =N/A  |
|                                           | Pain Relief at 2 hours         | RR: 0.26; 95% CI: 0.07 to 0.94; I <sup>2</sup> =N/A  |
|                                           | Sustained Pain Free at 1 day   | RR: 0.20; 95% CI: 0.01 to 3.40; I <sup>2</sup> =N/A  |
|                                           | Sustained Pain Relief at 1 day | RR: 0.58; 95% CI: 0.24 to 1.38; I <sup>2</sup> =N/A  |
| Lasmiditan 5 mg vs.<br>Lasmiditan 30 mg   | Pain Free at 2 hours           | RR: 0.10; 95% CI: 0.01 to 1.63; I <sup>2</sup> =N/A  |
|                                           | Pain Relief at 2 hours         | RR: 0.24; 95% CI: 0.06 to 0.89; I <sup>2</sup> =N/A  |
|                                           | Sustained Pain Free at 1 day   | RR: 0.18; 95% CI: 0.01 to 3.30; I <sup>2</sup> =N/A  |
|                                           | Sustained Pain Relief at 1 day | RR: 0.48; 95% CI: 0.20 to 1.15; I <sup>2</sup> =N/A  |
| Lasmiditan 5 mg vs.<br>Lasmiditan 45 mg   | Pain Free at 2 hours           | RR: 0.13; 95% CI: 0.01 to 2.65; I <sup>2</sup> =N/A  |
|                                           | Pain Relief at 2 hours         | RR: 0.22; 95% CI: 0.05 to 0.88; I <sup>2</sup> =N/A  |
|                                           | Sustained Pain Free at 1 day   | RR: 0.12; 95% CI: 0.01 to 2.65; I <sup>2</sup> =N/A  |
|                                           | Sustained Pain Relief at 1 day | RR: 1.33; 95% CI: 0.20 to 8.70; I <sup>2</sup> =N/A  |
| Lasmiditan 20 mg vs.<br>Lasmiditan 2.5 mg | Pain Free at 2 hours           | RR: 2.93; 95% CI: 0.21 to 43.16; I <sup>2</sup> =N/A |
|                                           | Sustained Pain Free at 1 day   | RR: 1.89; 95% CI: 0.12 to 29.2; I <sup>2</sup> =N/A  |
|                                           | Sustained Pain Relief at 1 day | RR: 0.76; 95% CI: 0.39 to 1.46; I <sup>2</sup> =N/A  |
| Lasmiditan 20 mg vs.<br>Lasmiditan 10 mg  | Pain Free at 2 hours           | RR: 1.37; 95% CI: 0.52 to 3.63; I <sup>2</sup> =N/A  |
|                                           | Pain Relief at 2 hours         | RR: 1.18; 95% CI: 0.75 to 1.88; I <sup>2</sup> =N/A  |
|                                           | Sustained Pain Free at 1 day   | RR: 1.42; 95% CI: 0.38 to 5.36; I <sup>2</sup> =N/A  |
|                                           | Sustained Pain Relief at 1 day | RR: 1.05; 95% CI: 0.64 to 1.71; I <sup>2</sup> =N/A  |
| Lasmiditan 30 mg vs.<br>Lasmiditan 2.5 mg | Pain Free at 2 hours           | RR: 3.82; 95% CI: 0.26 to 56.78; I <sup>2</sup> =N/A |
|                                           | Pain Relief at 2 hours         | RR: 1.37; 95% CI: 0.48 to 3.86; I <sup>2</sup> =N/A  |
|                                           | Sustained Pain Free at 1 day   | RR: 2.05; 95% CI: 0.12 to 33.5; I <sup>2</sup> =N/A  |
|                                           | Sustained Pain Relief at 1 day | RR: 0.91; 95% CI: 0.47 to 1.76; I <sup>2</sup> =N/A  |
| Lasmiditan 30 mg vs.<br>Lasmiditan 10 mg  | Pain Free at 2 hours           | RR: 1.80; 95% CI: 0.66 to 4.91; I <sup>2</sup> =N/A  |
|                                           | Pain Relief at 2 hours         | RR: 1.27; 95% CI: 0.77 to 2.08; I <sup>2</sup> =N/A  |
|                                           | Sustained Pain Free at 1 day   | RR: 1.50; 95% CI: 0.34 to 6.52; I <sup>2</sup> =N/A  |
|                                           | Sustained Pain Relief at 1 day | RR: 1.26; 95% CI: 0.77 to 2.08; I <sup>2</sup> =N/A  |
| Lasmiditan 30 mg vs.<br>Lasmiditan 20 mg  | Pain Free at 2 hours           | RR: 1.31; 95% CI: 0.55 to 3.11; I <sup>2</sup> =N/A  |
|                                           | Sustained Pain Free at 1 day   | RR: 1.05; 95% CI: 0.28 to 3.82; I <sup>2</sup> =N/A  |
|                                           | Sustained Pain Relief at 1 day | RR: 1.20; 95% CI: 0.75 to 1.90; I <sup>2</sup> =N/A  |
| Lasmiditan 45 mg vs.<br>Lasmiditan 2.5 mg | Pain Free at 2 hours           | RR: 3.00; 95% CI: 0.16 to 57.36; I <sup>2</sup> =N/A |
|                                           | Pain Relief at 2 hours         | RR: 1.50; 95% CI: 0.48 to 4.65; I <sup>2</sup> =N/A  |
|                                           | Sustained Pain Free at 1 day   | RR: 3.00; 95% CI: 0.15 to 57.36; I <sup>2</sup> =N/A |
|                                           | Sustained Pain Relief at 1 day | RR: 0.33; 95% CI: 0.05 to 1.99; I <sup>2</sup> =N/A  |
|                                           | Pain Free at 2 hours           | RR: 1.20; 95% CI: 0.18 to 7.77; I <sup>2</sup> =N/A  |

| Comparison                              | Outcome                        | Findings                                                |
|-----------------------------------------|--------------------------------|---------------------------------------------------------|
| Lasmiditan 45 mg vs. Lasmiditan 10 mg   | Pain Relief at 2 hours         | RR: 1.38; 95% CI: 0.70 to 2.72; I <sup>2</sup> =N/A     |
|                                         | Sustained Pain Free at 1 day   | RR: 2.00; 95% CI: 0.27 to 14.78; I <sup>2</sup> =N/A    |
|                                         | Sustained Pain Relief at 1 day | RR: 0.46; 95% CI: 0.08 to 2.62; I <sup>2</sup> =N/A     |
| Lasmiditan 45 mg vs. Lasmiditan 20 mg   | Pain Free at 2 hours           | RR: 0.87; 95% CI: 0.14 to 5.27; I <sup>2</sup> =N/A     |
|                                         | Pain Relief at 2 hours         | RR: 1.07; 95% CI: 0.69 to 1.64; I <sup>2</sup> =N/A     |
|                                         | Sustained Pain Free at 1 day   | RR: 1.40; 95% CI: 0.21 to 9.12; I <sup>2</sup> =N/A     |
|                                         | Sustained Pain Relief at 1 day | RR: 0.43; 95% CI: 0.07 to 2.46; I <sup>2</sup> =N/A     |
| Lasmiditan 45 mg vs. Lasmiditan 30 mg   | Pain Free at 2 hours           | RR: 0.66; 95% CI: 0.11 to 4.08; I <sup>2</sup> =N/A     |
|                                         | Pain Relief at 2 hours         | RR: 1.09; 95% CI: 0.56 to 2.10; I <sup>2</sup> =N/A     |
|                                         | Sustained Pain Free at 1 day   | RR: 1.33; 95% CI: 0.18 to 9.65; I <sup>2</sup> =N/A     |
|                                         | Sustained Pain Relief at 1 day | RR: 0.36; 95% CI: 0.06 to 2.04; I <sup>2</sup> =N/A     |
| Lasmiditan 50 mg vs. Lasmiditan 100 mg  | Function Scale at 2 hours      | SMD: 0.68; 95% CI: 0.96 to 0.41; I <sup>2</sup> =N/A    |
|                                         | Pain Free at 2 hours           | RR: 0.96; 95% CI: 0.79 to 1.16; I <sup>2</sup> =0.00%   |
|                                         | Pain Relief at 2 hours         | RR: 0.92; 95% CI: 0.83 to 1.02; I <sup>2</sup> =80.20%  |
|                                         | Pain Scale at 2 hours          | SMD: 0.66; 95% CI: 0.38 to 0.94; I <sup>2</sup> =N/A    |
|                                         | Restored Function at 2 hours   | RR: 0.97; 95% CI: 0.82 to 1.16; I <sup>2</sup> =N/A     |
|                                         | Sustained Pain Free at 1 week  | RR: 1.04; 95% CI: 0.78 to 1.37; I <sup>2</sup> =N/A     |
|                                         | Sustained Pain Free at 1 day   | RR: 1.01; 95% CI: 0.78 to 1.31; I <sup>2</sup> =N/A     |
| Lasmiditan 50 mg vs. Lasmiditan 200 mg  | Function Scale at 2 hours      | SMD: 8.66; 95% CI: 9.55 to 7.78; I <sup>2</sup> =N/A    |
|                                         | Pain Free at 2 hours           | RR: 0.78; 95% CI: 0.65 to 0.93; I <sup>2</sup> =0.00%   |
|                                         | Pain Relief at 2 hours         | RR: 0.96; 95% CI: 0.87 to 1.06; I <sup>2</sup> =0.00%   |
|                                         | Pain Scale at 2 hours          | SMD: 6.84; 95% CI: 7.56 to 6.13; I <sup>2</sup> =N/A    |
|                                         | Restored Function at 2 hours   | RR: 0.90; 95% CI: 0.76 to 1.06; I <sup>2</sup> =N/A     |
|                                         | Sustained Pain Free at 1 day   | RR: 0.81; 95% CI: 0.63 to 1.02; I <sup>2</sup> =N/A     |
|                                         | Sustained Pain Free at 1 week  | RR: 0.80; 95% CI: 0.62 to 1.04; I <sup>2</sup> =N/A     |
| Lasmiditan 50 mg vs. Lasmiditan 400 mg  | Function Scale at 2 hours      | SMD: 10.66; 95% CI: 11.74 to 9.59; I <sup>2</sup> = N/A |
|                                         | Pain Free at 2 hours           | RR: 0.54; 95% CI: 0.27 to 1.07; I <sup>2</sup> =N/A     |
|                                         | Pain Relief at 2 hours         | RR: 0.72; 95% CI: 0.51 to 1.03; I <sup>2</sup> =N/A     |
|                                         | Pain Scale at 2 hours          | SMD: 8.11; 95% CI: 8.94 to 7.27; I <sup>2</sup> =N/A    |
| Lasmiditan 200 mg vs. Lasmiditan 100 mg | Function Scale at 2 hours      | SMD: 8.27; 95% CI: 7.42 to 9.13; I <sup>2</sup> =N/A    |
|                                         | Pain Free at 2 hours           | RR: 1.20; 95% CI: 1.07 to 1.34; I <sup>2</sup> =0.00%   |
|                                         | Pain Free at 1 day             | RR: 1.03; 95% CI: 0.91 to 1.16; I <sup>2</sup> =N/A     |
|                                         | Pain Relief at 2 hours         | RR: 0.99; 95% CI: 0.93 to 1.05; I <sup>2</sup> =39.27%  |

| Comparison                              | Outcome                         | Findings                                               |
|-----------------------------------------|---------------------------------|--------------------------------------------------------|
|                                         | Pain Relief at 1 day            | RR: 1.10; 95% CI: 1.02 to 1.18; I <sup>2</sup> =N/A    |
|                                         | Pain Scale at 2 hours           | SMD: 8.56; 95% CI: 7.68 to 9.44; I <sup>2</sup> =N/A   |
|                                         | Restored Function at 2 hours    | RR: 1.05; 95% CI: 0.94 to 1.18; I <sup>2</sup> =0.00%  |
|                                         | Sustained Pain Free at 1 day    | RR: 1.28; 95% CI: 1.06 to 1.55; I <sup>2</sup> =0.00%  |
|                                         | Sustained Pain Free at 1 week   | RR: 1.43; 95% CI: 1.15 to 1.77; I <sup>2</sup> =35.72% |
|                                         | Sustained Pain Relief at 1 day  | RR: 1.24; 95% CI: 0.95 to 1.62; I <sup>2</sup> =N/A    |
|                                         | Sustained Pain Relief at 1 week | RR: 1.08; 95% CI: 0.81 to 1.42; I <sup>2</sup> =N/A    |
| Lasmiditan 400 mg vs. Lasmiditan 100 mg | Function Scale at 2 hours       | SMD: 10.34; 95% CI: 9.31 to 11.39; I <sup>2</sup> =N/A |
|                                         | Pain Free at 2 hours            | RR: 1.81; 95% CI: 0.91 to 3.61; I <sup>2</sup> =N/A    |
|                                         | Pain Relief at 2 hours          | RR: 0.88; 95% CI: 0.66 to 1.19; I <sup>2</sup> =N/A    |
|                                         | Pain Scale at 2 hours           | SMD: 10.38; 95% CI: 9.33 to 11.4; I <sup>2</sup> =N/A  |
| Lasmiditan 400 mg vs. Lasmiditan 200 mg | Function Scale at 2 hours       | SMD: 2.00; 95% CI: 1.66 to 2.34; I <sup>2</sup> =N/A   |
|                                         | Pain Free at 2 hours            | RR: 1.47; 95% CI: 0.77 to 2.82; I <sup>2</sup> =N/A    |
|                                         | Pain Relief at 2 hours          | RR: 1.26; 95% CI: 0.89 to 1.79; I <sup>2</sup> =N/A    |
|                                         | Pain Scale at 2 hours           | SMD: 0.73; 95% CI: 0.44 to 1.02; I <sup>2</sup> =N/A   |

CI = confidence interval; mg = milligram; N/A = not available; RR = relative risk; SMD = standardized mean deviation

**eTable 10.12 Subgroup analysis by risk of bias for antiemetic**

| Comparison                          | Outcome             | Risk of Bias | Findings                                                  |
|-------------------------------------|---------------------|--------------|-----------------------------------------------------------|
| Metoclopramide vs. Placebo          | Pain Relief 2 hours | Low ROB      | RR: 1.48; 95% CI: 1.10 to 2.01; I <sup>2</sup> =N/A       |
|                                     |                     | High ROB     | RR: 3.11; 95% CI: 1.85 to 5.20; I <sup>2</sup> =0.00%     |
|                                     |                     | Overall      | RR: 1.91; 95% CI: 1.47 to 2.48; I <sup>2</sup> =67.30%    |
|                                     | Pain Scale 2 hours  | Low ROB      | SMD: -0.38; 95% CI: -0.70 to -0.06; I <sup>2</sup> =N/A   |
|                                     |                     | High ROB     | SMD: 0.71; 95% CI: 0.13 to 1.28; I <sup>2</sup> =N/A      |
|                                     |                     | Overall      | SMD: -0.12; 95% CI: -0.40 to 0.17; I <sup>2</sup> =90.46% |
| Prochlorperazine vs. Metoclopramide | Pain Relief 2 hours | Moderate ROB | RR: 1.08; 95% CI: 0.85 to 1.35; I <sup>2</sup> =N/A       |
|                                     |                     | High ROB     | RR: 0.60; 95% CI: 0.38 to 0.95; I <sup>2</sup> =N/A       |
|                                     |                     | Overall      | RR: 0.89; 95% CI: 0.72 to 1.10; I <sup>2</sup> =81.90%    |

CI = confidence interval; N/A = not applicable; RR = relative risk; ROB = risk of bias; SMD = standardized mean difference

**eTable 10.13 Subgroup analysis by dosage for antiemetic**

| <b>Comparison</b>                               | <b>Outcome</b>                  | <b>Findings</b>                                       |
|-------------------------------------------------|---------------------------------|-------------------------------------------------------|
| Droperidol 0.1 mg vs. Placebo                   | Pain Free at 2 hours            | RR: 1.18; 95% CI: 0.71 to 1.98; I <sup>2</sup> =N/A   |
|                                                 | Pain Relief at 2 hours          | RR: 1.13; 95% CI: 0.86 to 1.50; I <sup>2</sup> =N/A   |
| Droperidol 2.75 mg vs. Placebo                  | Pain Free at 2 hours            | RR: 2.11; 95% CI: 1.37 to 3.26; I <sup>2</sup> =N/A   |
|                                                 | Pain Relief at 2 hours          | RR: 1.51; 95% CI: 1.19 to 1.92; I <sup>2</sup> =N/A   |
| Droperidol 2.75 mg vs. Droperidol 0.1 mg        | Pain Free at 2 hours            | RR: 1.78; 95% CI: 1.21 to 2.63; I <sup>2</sup> =N/A   |
|                                                 | Pain Relief at 2 hours          | RR: 1.34; 95% CI: 1.09 to 1.64; I <sup>2</sup> =N/A   |
| Droperidol 5.5 mg vs. Placebo                   | Pain Free at 2 hours            | RR: 1.49; 95% CI: 0.92 to 2.42; I <sup>2</sup> =N/A   |
|                                                 | Pain Relief at 2 hours          | RR: 1.42; 95% CI: 1.11 to 1.82; I <sup>2</sup> =N/A   |
| Droperidol 5.5 mg vs. Droperidol 0.1 mg         | Pain Free at 2 hours            | RR: 1.26; 95% CI: 0.81 to 1.97; I <sup>2</sup> =N/A   |
|                                                 | Pain Relief at 2 hours          | RR: 1.25; 95% CI: 1.00 to 1.56; I <sup>2</sup> =N/A   |
| Droperidol 5.5 mg vs. Droperidol 2.75 mg        | Pain Free at 2 hours            | RR: 0.71; 95% CI: 0.50 to 1.00; I <sup>2</sup> =N/A   |
|                                                 | Pain Relief at 2 hours          | RR: 0.94; 95% CI: 0.80 to 1.09; I <sup>2</sup> =N/A   |
| Droperidol 8.25 mg vs. Placebo                  | Pain Free at 2 hours            | RR: 1.61; 95% CI: 1.01 to 2.58; I <sup>2</sup> =N/A   |
|                                                 | Pain Relief at 2 hours          | RR: 1.49; 95% CI: 1.17 to 1.89; I <sup>2</sup> =N/A   |
| Droperidol 8.25 mg vs. Droperidol 0.1 mg        | Pain Free at 2 hours            | RR: 1.36; 95% CI: 0.89 to 2.09; I <sup>2</sup> =N/A   |
|                                                 | Pain Relief at 2 hours          | RR: 1.31; 95% CI: 1.06 to 1.61; I <sup>2</sup> =N/A   |
| Droperidol 8.25 mg vs. Droperidol 2.75 mg       | Pain Free at 2 hours            | RR: 0.76; 95% CI: 0.55 to 1.06; I <sup>2</sup> =N/A   |
|                                                 | Pain Relief at 2 hours          | RR: 0.98; 95% CI: 0.85 to 1.13; I <sup>2</sup> =N/A   |
| Droperidol 8.25 mg vs. Droperidol 5.5 mg        | Pain Free at 2 hours            | RR: 1.08; 95% CI: 0.73 to 1.59; I <sup>2</sup> =N/A   |
|                                                 | Pain Relief at 2 hours          | RR: 1.05; 95% CI: 0.89 to 1.23; I <sup>2</sup> =N/A   |
| Granisetron 40 µg/ kg vs. Placebo               | Pain Free at 2 hours            | RR: 2.45; 95% CI: 0.11 to 53.25; I <sup>2</sup> =N/A  |
|                                                 | Pain Scale at 2 hours           | SMD: 1.22; 95% CI: 0.20 to 2.24; I <sup>2</sup> =N/A  |
| Granisetron 80 µg/ kg vs. Placebo               | Pain Scale at 2 hours           | SMD: 1.79; 95% CI: 0.67 to 2.91; I <sup>2</sup> =N/A  |
| Granisetron 80 µg/ kg vs. Granisetron 40 µg/ kg | Pain Free at 2 hours            | RR: 0.33; 95% CI: 0.02 to 7.32; I <sup>2</sup> =N/A   |
|                                                 | Pain Scale at 2 hours           | SMD: 0.21; 95% CI: -0.67 to 1.09; I <sup>2</sup> =N/A |
| Metoclopramide 20 mg vs. Metoclopramide 10 mg   | Pain Free at 2 hours            | RR: 1.04; 95% CI: 0.77 to 1.38; I <sup>2</sup> =N/A   |
|                                                 | Pain Relief at 2 hours          | RR: 0.97; 95% CI: 0.85 to 1.10; I <sup>2</sup> =N/A   |
|                                                 | Pain Scale at 2 hours           | SMD: 0.07; 95% CI: -0.18 to 0.33; I <sup>2</sup> =N/A |
|                                                 | Restored Function at 2 hours    | RR: 0.93; 95% CI: 0.75 to 1.15; I <sup>2</sup> =N/A   |
|                                                 | Sustained Pain Free at 1 week   | RR: 1.22; 95% CI: 0.70 to 2.14; I <sup>2</sup> =N/A   |
|                                                 | Sustained Pain Relief at 1 week | RR: 1.04; 95% CI: 0.81 to 1.33; I <sup>2</sup> =N/A   |

| Comparison                                       | Outcome                         | Findings                                              |
|--------------------------------------------------|---------------------------------|-------------------------------------------------------|
| Metoclopramide 40 mg vs.<br>Metoclopramide 10 mg | Pain Free at 2 hours            | RR: 1.00; 95% CI: 0.74 to 1.34; I <sup>2</sup> =N/A   |
|                                                  | Pain Relief at 2 hours          | RR: 1.03; 95% CI: 0.92 to 1.15; I <sup>2</sup> =N/A   |
|                                                  | Pain Scale at 2 hours           | SMD: 0.21; 95% CI: -0.05 to 0.47; I <sup>2</sup> =N/A |
|                                                  | Restored Function at 2 hours    | RR: 1.09; 95% CI: 0.90 to 1.32; I <sup>2</sup> =N/A   |
|                                                  | Sustained Pain Free at 1 week   | RR: 1.28; 95% CI: 0.73 to 2.22; I <sup>2</sup> =N/A   |
|                                                  | Sustained Pain Relief at 1 week | RR: 1.14; 95% CI: 0.90 to 1.44; I <sup>2</sup> =N/A   |
| Metoclopramide 40 mg vs.<br>Metoclopramide 20 mg | Pain Free at 2 hours            | RR: 0.96; 95% CI: 0.72 to 1.28; I <sup>2</sup> =N/A   |
|                                                  | Pain Relief at 2 hours          | RR: 1.06; 95% CI: 0.94 to 1.20; I <sup>2</sup> =N/A   |
|                                                  | Pain Scale at 2 hours           | SMD: 0.14; 95% CI: -0.12 to 0.40; I <sup>2</sup> =N/A |
|                                                  | Restored Function at 2 hours    | RR: 1.18; 95% CI: 0.96 to 1.43; I <sup>2</sup> =N/A   |
|                                                  | Sustained Pain Free at 1 week   | RR: 1.04; 95% CI: 0.63 to 1.74; I <sup>2</sup> =N/A   |
|                                                  | Sustained Pain Relief at 1 week | RR: 1.10; 95% CI: 0.87 to 1.37; I <sup>2</sup> =N/A   |

CI = confidence interval; kg = kilograms; mg = milligrams; N/A = not applicable; RR = risk ratio; SMD = standardized mean difference; ug = micrograms

**eTable 10.14 Subgroup analysis by risk of bias for ergot alkaloids**

| Comparison                    | Outcome                      | Risk of Bias | Findings                                               |
|-------------------------------|------------------------------|--------------|--------------------------------------------------------|
| Dihydroergotamine vs. Placebo | Pain Free 2 hours            | Low ROB      | RR: 2.82; 95% CI: 2.01 to 3.95; I <sup>2</sup> =N/A    |
|                               |                              | High ROB     | RR: 4.76; 95% CI: 0.68 to 33.34; I <sup>2</sup> =N/A   |
|                               |                              | Overall      | RR: 2.89; 95% CI: 2.07 to 4.03; I <sup>2</sup> =0.00%  |
|                               | Pain Relief 2 hours          | Low ROB      | RR: 1.70; 95% CI: 1.44 to 2.01; I <sup>2</sup> =N/A    |
|                               |                              | Moderate ROB | RR: 2.45; 95% CI: 1.66 to 3.63; I <sup>2</sup> =N/A    |
|                               |                              | High ROB     | RR: 1.75; 95% CI: 0.80 to 3.83; I <sup>2</sup> =N/A    |
|                               |                              | Overall      | RR: 1.83; 95% CI: 1.58 to 2.13; I <sup>2</sup> =30.30% |
|                               | Pain Relief 1 day            | Low ROB      | RR: 1.63; 95% CI: 1.37 to 1.93; I <sup>2</sup> =N/A    |
|                               |                              | Moderate ROB | RR: 2.42; 95% CI: 1.72 to 3.39; I <sup>2</sup> =N/A    |
|                               |                              | Overall      | RR: 1.79; 95% CI: 1.54 to 2.09; I <sup>2</sup> =76.40% |
|                               | Sustained Pain Free 1 day    | Low ROB      | RR: 3.48; 95% CI: 2.30 to 5.28; I <sup>2</sup> =N/A    |
|                               |                              | High ROB     | RR: 3.97; 95% CI: 0.56 to 28.09; I <sup>2</sup> =N/A   |
|                               |                              | Overall      | RR: 3.51; 95% CI: 2.33 to 5.28; I <sup>2</sup> =0.00%  |
|                               | Sustained Pain Free 1 week   | Low ROB      | RR: 2.93; 95% CI: 1.86 to 4.62; I <sup>2</sup> =N/A    |
|                               |                              | High ROB     | RR: 3.44; 95% CI: 0.48 to 24.59; I <sup>2</sup> =N/A   |
|                               |                              | Overall      | RR: 2.96; 95% CI: 1.90 to 4.62; I <sup>2</sup> =0.00%  |
|                               | Sustained Pain Relief 1 day  | Low ROB      | RR: 2.21; 95% CI: 1.74 to 2.81; I <sup>2</sup> =N/A    |
|                               |                              | High ROB     | RR: 2.65; 95% CI: 0.68 to 10.29; I <sup>2</sup> =N/A   |
|                               |                              | Overall      | RR: 2.23; 95% CI: 1.76 to 2.82; I <sup>2</sup> =0.00%  |
|                               | Sustained Pain Relief 1 week | Low ROB      | RR: 2.09; 95% CI: 1.59 to 2.75; I <sup>2</sup> =N/A    |
|                               |                              | High ROB     | RR: 2.51; 95% CI: 0.64 to 9.81; I <sup>2</sup> =N/A    |
|                               |                              | Overall      | RR: 2.11; 95% CI: 1.62 to 2.77; I <sup>2</sup> =0.00%  |

CI = confidence interval; N/A = not applicable; RR = relative risk; ROB = risk of bias



**eTable 10.15 Subgroup analysis by dosage for ergot alkaloids**

| Comparison                                        | Outcome                                             | Findings                                               |
|---------------------------------------------------|-----------------------------------------------------|--------------------------------------------------------|
| Dihydroergotamine 1 mg vs. Placebo                | Pain Free at 2 hours                                | RR: 5.65; 95% CI: 0.79 to 40.42; I <sup>2</sup> =N/A   |
|                                                   | Pain Relief at 2 hours                              | RR: 1.95; 95% CI: 0.87 to 4.36; I <sup>2</sup> =N/A    |
|                                                   | Sustained Pain Free at 1 day                        | RR: 5.14; 95% CI: 0.71 to 37.07; I <sup>2</sup> =N/A   |
|                                                   | Sustained Pain Free at 1 week                       | RR: 5.14; 95% CI: 0.71 to 37.07; I <sup>2</sup> =N/A   |
|                                                   | Sustained Pain Relief at 1 day                      | RR: 2.82; 95% CI: 0.70 to 11.41; I <sup>2</sup> =N/A   |
|                                                   | Sustained Pain Relief at 1 week                     | RR: 2.82; 95% CI: 0.70 to 11.41; I <sup>2</sup> =N/A   |
| Dihydroergotamine 2 mg vs. Placebo                | Pain Free at 2 hours                                | RR: 3.81; 95% CI: 0.50 to 28.64; I <sup>2</sup> =N/A   |
|                                                   | Pain Relief at 2 hours                              | RR: 2.59; 95% CI: 1.81 to 3.71; I <sup>2</sup> =45.00% |
|                                                   | Pain Relief at 1 day                                | RR: 2.68; 95% CI: 1.89 to 3.79; I <sup>2</sup> =N/A    |
|                                                   | Restored Function at 2 hours                        | RR: 2.73; 95% CI: 1.62 to 4.60; I <sup>2</sup> =N/A    |
|                                                   | Restored Function at 1 day                          | RR: 3.12; 95% CI: 1.98 to 4.91; I <sup>2</sup> =N/A    |
|                                                   | Sustained Pain Free at 1 day                        | RR: 2.72; 95% CI: 0.34 to 21.58; I <sup>2</sup> =N/A   |
|                                                   | Sustained Pain Free at 1 week                       | RR: 1.63; 95% CI: 0.18 to 14.60; I <sup>2</sup> =N/A   |
|                                                   | Sustained Pain Relief at 1 day                      | RR: 2.45; 95% CI: 0.59 to 10.15; I <sup>2</sup> =N/A   |
| Sustained Pain Relief at 1 week                   | RR: 2.18; 95% CI: 0.51 to 9.20; I <sup>2</sup> =N/A |                                                        |
| Dihydroergotamine 2 mg vs. Dihydroergotamine 1 mg | Pain Free at 2 hours                                | RR: 0.67; 95% CI: 0.29 to 1.53; I <sup>2</sup> =N/A    |
|                                                   | Pain Relief at 2 hours                              | RR: 0.78; 95% CI: 0.47 to 1.28; I <sup>2</sup> =N/A    |
|                                                   | Sustained Pain Free at 1 day                        | RR: 0.53; 95% CI: 0.20 to 1.38; I <sup>2</sup> =N/A    |
|                                                   | Sustained Pain Free at 1 week                       | RR: 0.31; 95% CI: 0.09 to 1.05; I <sup>2</sup> =N/A    |
|                                                   | Sustained Pain Relief at 1 day                      | RR: 0.86; 95% CI: 0.41 to 1.82; I <sup>2</sup> =N/A    |
|                                                   | Sustained Pain Relief at 1 week                     | RR: 0.77; 95% CI: 0.35 to 1.67; I <sup>2</sup> =N/A    |
| Dihydroergotamine 3 mg vs. Placebo                | Pain Relief at 2 hours                              | RR: 1.97; 95% CI: 1.27 to 3.04; I <sup>2</sup> =0.00%  |
|                                                   | Pain Relief at 1 day                                | RR: 2.13; 95% CI: 1.47 to 3.07; I <sup>2</sup> =N/A    |
|                                                   | Restored Function at 2 hours                        | RR: 2.01; 95% CI: 1.15 to 3.51; I <sup>2</sup> =N/A    |
|                                                   | Restored Function at 1 day                          | RR: 2.52; 95% CI: 1.57 to 4.04; I <sup>2</sup> =N/A    |
| Dihydroergotamine 3 mg vs. Dihydroergotamine 2 mg | Pain Relief at 2 hours                              | RR: 0.67; 95% CI: 0.51 to 0.89; I <sup>2</sup> =N/A    |
|                                                   | Pain Relief at 1 day                                | RR: 0.79; 95% CI: 0.64 to 0.97; I <sup>2</sup> =N/A    |
|                                                   | Restored Function at 2 hours                        | RR: 0.73; 95% CI: 0.50 to 1.07; I <sup>2</sup> =N/A    |
|                                                   | Restored Function at 1 day                          | RR: 0.80; 95% CI: 0.61 to 1.06; I <sup>2</sup> =N/A    |
| Oral ergotamine vs. Placebo                       | Pain Scale at 2 hours                               | SMD: 0.13; 95% CI: 1.12 to 0.85; I <sup>2</sup> =N/A   |
| Oral ergotamine vs. Buccal PCZ                    | Pain Scale at 2 hours                               | SMD: 0.58; 95% CI: 1.45 to 0.28; I <sup>2</sup> =N/A   |

CI = confidence interval; mg = milligram; N/A = not available; PCZ = prochlorperazine; RR = relative risk; SMD = standardized mean deviation

**eTable 10.16 Subgroup analysis by risk of bias for other pharmacological interventions**

| Comparison                | Outcome                     | Risk of Bias       | Findings                                                  |                                                          |
|---------------------------|-----------------------------|--------------------|-----------------------------------------------------------|----------------------------------------------------------|
| Acetaminophen vs. Placebo | Pain Free 2 hours           | Low ROB            | RR: 1.69; 95% CI: 0.91 to 3.18; I <sup>2</sup> =N/A       |                                                          |
|                           |                             | Moderate ROB       | RR: 2.05; 95% CI: 1.17 to 3.59; I <sup>2</sup> =N/A       |                                                          |
|                           |                             | Overall            | RR: 1.89; 95% CI: 1.24 to 2.86; I <sup>2</sup> =0.00%     |                                                          |
|                           | Pain Free 1 day             | Low ROB            | RR: 1.75; 95% CI: 1.22 to 2.52; I <sup>2</sup> =N/A       |                                                          |
|                           |                             | Moderate ROB       | RR: 1.81; 95% CI: 1.26 to 2.60; I <sup>2</sup> =N/A       |                                                          |
|                           |                             | Overall            | RR: 1.78; 95% CI: 1.38 to 2.30; I <sup>2</sup> = 0.00%    |                                                          |
|                           | Pain Relief 2 hours         | Low ROB            | RR: 1.68; 95% CI: 1.28 to 2.20; I <sup>2</sup> = N/A      |                                                          |
|                           |                             | Moderate ROB       | RR: 1.54; 95% CI: 1.18 to 2.01; I <sup>2</sup> =N/A       |                                                          |
|                           |                             | Overall            | RR: 1.61; 95% CI: 1.33 to 1.95; I <sup>2</sup> =0.00%     |                                                          |
|                           | Pain Relief 1 day           | Low ROB            | RR: 1.73; 95% CI: 1.34 to 2.24; I <sup>2</sup> =N/A       |                                                          |
|                           |                             | Moderate ROB       | RR: 1.68; 95% CI: 1.31 to 2.15; I <sup>2</sup> =N/A       |                                                          |
|                           |                             | Overall            | RR: 1.71; 95% CI: 1.43 to 2.04; I <sup>2</sup> =0.00%     |                                                          |
|                           | Pain Scale 2 hours          | Low ROB            | SMD: 0.42; 95% CI: 0.22 to 0.62; I <sup>2</sup> =N/A      |                                                          |
|                           |                             | Moderate ROB       | SMD: 0.37; 95% CI: 0.16 to 0.58; I <sup>2</sup> =N/A      |                                                          |
|                           |                             | Overall            | SMD: 0.39; 95% CI: 0.25 to 0.54; I <sup>2</sup> =0.00%    |                                                          |
|                           | Restored Function 2 hours   | Low ROB            | RR: 1.48; 95% CI: 0.87 to 2.51; I <sup>2</sup> =N/A       |                                                          |
|                           |                             | Moderate ROB       | RR: 2.08; 95% CI: 1.31 to 3.30; I <sup>2</sup> =N/A       |                                                          |
|                           |                             | Overall            | RR: 1.80; 95% CI: 1.27 to 2.54; I <sup>2</sup> =0.00%     |                                                          |
|                           | Restored Function 1 day     | Low ROB            | RR: 1.67; 95% CI: 1.19 to 2.35; I <sup>2</sup> =N/A       |                                                          |
|                           |                             | Moderate ROB       | RR: 1.81; 95% CI: 1.37 to 2.39; I <sup>2</sup> =N/A       |                                                          |
|                           |                             | Overall            | RR: 1.75; 95% CI: 1.41 to 2.17; I <sup>2</sup> =0.00%     |                                                          |
|                           | Lidocaine vs. Placebo       | Pain Scale 2 hours | Moderate ROB                                              | SMD: 0.46; 95% CI: 0.10 to 0.82; I <sup>2</sup> =72.60%  |
|                           |                             |                    | High ROB                                                  | SMD: -0.30; 95% CI: -0.61 to 0.01; I <sup>2</sup> =N/A   |
|                           |                             |                    | Overall                                                   | SMD: 0.02; 95% CI: -0.21 to 0.26; I <sup>2</sup> =85.00% |
|                           | Valproate vs. Dexamethasone | Pain Scale 2 hours | Low ROB                                                   | SMD: -0.30; 95% CI: -0.74 to 0.15; I <sup>2</sup> =N/A   |
|                           |                             |                    | High ROB                                                  | SMD: -0.03; 95% CI: -0.45 to 0.39; I <sup>2</sup> =N/A   |
|                           |                             |                    | Overall                                                   | SMD: -0.16; 95% CI: -0.46 to 0.15; I <sup>2</sup> =0.00% |
| Pain Scale 1 day          |                             | Low ROB            | SMD: -0.39; 95% CI: -0.84 to 0.04; I <sup>2</sup> =N/A    |                                                          |
|                           |                             | High ROB           | SMD: 0.36; 95% CI: -0.26 to 0.99; I <sup>2</sup> =N/A     |                                                          |
|                           |                             | Overall            | SMD: -0.15; 95% CI: -0.51 to 0.22; I <sup>2</sup> =73.59% |                                                          |

CI = confidence interval; N/A = not applicable; RR = relative risk; ROB = risk of bias; SMD = standardized mean difference

**eTable 10.17 Subgroup analysis by study setting for other pharmacological interventions**

| Comparison            | Outcome             | Subgroup    | Findings                                                    |
|-----------------------|---------------------|-------------|-------------------------------------------------------------|
| Lidocaine vs. Placebo | Pain Relief 2 hours | ED          | RR: 0.54; 95% CI: 0.10 to 2.97; I <sup>2</sup> =N/A         |
|                       |                     | Urgent Care | RR: 2.64; 95% CI: 1.33 to 5.25; I <sup>2</sup> =N/A         |
|                       | Pain Scale 2 hours  | ED          | SMD: -0.22; 95% CI: -0.49 to 0.05;<br>I <sup>2</sup> =5.28% |
|                       |                     | Urgent Care | SMD: 0.75; 95% CI: 0.28 to 1.23; I <sup>2</sup> =N/A        |

CI = confidence interval; ED = emergency department; IV = intravenous; N/A = not applicable; RR = relative risk; SMD = standardized mean difference

**eTable 10.18 Subgroup analysis by route of administration for other pharmacological interventions**

| Comparison                                                          | Outcome               | Findings                                            |
|---------------------------------------------------------------------|-----------------------|-----------------------------------------------------|
| Intravenous prochlorperazine vs. Buccally absorbed prochlorperazine | Pain Scale at 2 hours | SMD:0.45; 95% CI: 0.00 to 0.89; I <sup>2</sup> =N/A |

CI = confidence interval; N/A = not applicable; SMD = standardized mean difference

**eTable 10.19 Subgroup analysis by dosage for other interventions**

| <b>Comparison</b>      | <b>Outcome</b>        | <b>Findings</b>                                       |
|------------------------|-----------------------|-------------------------------------------------------|
| Buccal PCZ vs. Placebo | Pain Scale at 2 hours | SMD: 0.45; 95% CI: -0.34 to 1.24; I <sup>2</sup> =N/A |

CI = confidence interval; µg = microgram; mg = milligram; N/A = not applicable; PCZ = prochlorperazine; RR = relative risk; SMD = standardized mean difference

**eTable 10.20 Subgroup analysis by risk of bias for nonpharmacologic therapy**

| Comparison                                     | Outcome            | Risk of Bias | Findings                                                 |
|------------------------------------------------|--------------------|--------------|----------------------------------------------------------|
| External trigeminal nerve stimulation vs. Sham | Pain Scale 2 hours | Low ROB      | SMD: 0.52; 95% CI: 0.13 to 0.91; I <sup>2</sup> = N/A    |
|                                                |                    | High ROB     | SMD: 4.48; 95% CI: 3.67 to 5.30; I <sup>2</sup> = N/A    |
|                                                |                    | Overall      | SMD: 1.25; 95% CI: 0.90 to 1.60; I <sup>2</sup> = 98.70% |

CI = confidence interval; ROB = risk of bias; SMD = standardized mean difference

**eTable 11. Risk of bias (Cochrane Risk of Bias tool for randomized trials [RoB 2.0]) for randomized clinical trials**

| Author, Year                 | Overall ROB | ROB from Randomization Process | ROB due to Deviations from Intended Interventions | ROB due to Missing Outcome Data | ROB in Measurement of Outcomes | ROB in Selection of the Reported Results |
|------------------------------|-------------|--------------------------------|---------------------------------------------------|---------------------------------|--------------------------------|------------------------------------------|
| Aggarwal, 2020 <sup>19</sup> | High        | Moderate                       | Low                                               | High                            | Low                            | Low                                      |
| Alemдар,2007 <sup>20</sup>   | Moderate    | Moderate                       | Moderate                                          | Moderate                        | Moderate                       | Low                                      |
| Amiri,2017 <sup>21</sup>     | High        | Moderate                       | Low                                               | High                            | Low                            | Low                                      |
| Antal, 2020 <sup>22</sup>    | Moderate    | Low                            | Low                                               | Moderate                        | Low                            | Low                                      |
| Ashina, 2021 <sup>23</sup>   | High        | Moderate                       | Low                                               | High                            | Low                            | Low                                      |
| Aurora,2009 <sup>25</sup>    | High        | Low                            | Low                                               | High                            | Low                            | Low                                      |
| Aurora,2011 <sup>24</sup>    | Low         | Low                            | Low                                               | Low                             | Low                            | Low                                      |
| Avcu,2017 <sup>26</sup>      | High        | High                           | Low                                               | Low                             | Moderate                       | Low                                      |
| Banerjee, 1991 <sup>27</sup> | High        | Moderate                       | Low                                               | High                            | Moderate                       | Low                                      |
| Bell, 1990 <sup>28</sup>     | High        | Moderate                       | High                                              | High                            | Moderate                       | Low                                      |
| Bigal,2002 <sup>29</sup>     | High        | High                           | Low                                               | Moderate                        | Low                            | Low                                      |
| Bigal,2002 <sup>30</sup>     | High        | Moderate                       | Low                                               | High                            | Low                            | Low                                      |
| Blanda,2001 <sup>31</sup>    | Moderate    | Low                            | Low                                               | Low                             | Moderate                       | Low                                      |
| Borhani,2010 <sup>32</sup>   | High        | Moderate                       | Low                                               | High                            | Low                            | Low                                      |
| Boureau, 1994 <sup>33</sup>  | High        | Moderate                       | Low                                               | Low                             | Moderate                       | High                                     |
| Brandes,2020 <sup>34</sup>   | Moderate    | Moderate                       | Moderate                                          | Moderate                        | Moderate                       | Low                                      |
| Callahan, 1986 <sup>35</sup> | High        | Moderate                       | Low                                               | High                            | Moderate                       | High                                     |
| Cameron, 1995 <sup>36</sup>  | Moderate    | Low                            | Low                                               | Low                             | Moderate                       | Low                                      |
| Carleton, 1998 <sup>37</sup> | High        | Low                            | Low                                               | High                            | Low                            | Moderate                                 |
| Cete,2005 <sup>38</sup>      | Moderate    | Moderate                       | Low                                               | Moderate                        | Low                            | Low                                      |
| Chou,2019 <sup>39</sup>      | Low         | Low                            | Low                                               | Low                             | Low                            | Low                                      |
| Coppola, 1995 <sup>40</sup>  | High        | Moderate                       | Low                                               | High                            | Moderate                       | Low                                      |
| Corbo,2001 <sup>41</sup>     | Low         | Low                            | Low                                               | Low                             | Low                            | Low                                      |
| Croop,2019 <sup>42</sup>     | High        | Low                            | Low                                               | Low                             | Low                            | High                                     |
| Demirkaya,2001 <sup>43</sup> | High        | Moderate                       | High                                              | High                            | Moderate                       | Moderate                                 |
| Derosier,2010 <sup>44</sup>  | High        | Low                            | Low                                               | High                            | Moderate                       | Low                                      |
| Dexter, 1985 <sup>45</sup>   | High        | High                           | Low                                               | High                            | Moderate                       | Moderate                                 |
| Diamond, 1976 <sup>46</sup>  | High        | Moderate                       | Low                                               | High                            | Moderate                       | Moderate                                 |
| Diener,2002 <sup>47</sup>    | Low         | Low                            | Low                                               | Low                             | Low                            | Low                                      |
| Dodick, 2019 <sup>48</sup>   | Low         | Low                            | Low                                               | Low                             | Low                            | Low                                      |

| Author, Year                    | Overall ROB | ROB from Randomization Process | ROB due to Deviations from Intended Interventions | ROB due to Missing Outcome Data | ROB in Measurement of Outcomes | ROB in Selection of the Reported Results |
|---------------------------------|-------------|--------------------------------|---------------------------------------------------|---------------------------------|--------------------------------|------------------------------------------|
| Dogan,2019 <sup>49</sup>        | Low         | Low                            | Low                                               | Low                             | Low                            | Low                                      |
| Donaldson,2008 <sup>50</sup>    | Moderate    | Moderate                       | Low                                               | Moderate                        | Low                            | Low                                      |
| Etchison,2018 <sup>51</sup>     | Moderate    | Moderate                       | Low                                               | Low                             | Low                            | Low                                      |
| Farahmand,2018 <sup>52</sup>    | Moderate    | Moderate                       | Moderate                                          | Low                             | Low                            | Low                                      |
| Farkkila,2012 <sup>53</sup>     | Low         | Low                            | Low                                               | Low                             | Low                            | Low                                      |
| Fernando,2019 <sup>54</sup>     | Moderate    | Moderate                       | Low                                               | Moderate                        | Low                            | Low                                      |
| Ferrari,2010 <sup>55</sup>      | Low         | Low                            | Low                                               | Low                             | Low                            | Low                                      |
| Foroughipour,2013 <sup>56</sup> | High        | Moderate                       | Low                                               | High                            | Low                            | Low                                      |
| Freitag, 1993 <sup>57</sup>     | High        | Moderate                       | Low                                               | High                            | High                           | Moderate                                 |
| Friedman, 1989 <sup>59</sup>    | High        | Moderate                       | Low                                               | High                            | Moderate                       | Low                                      |
| Friedman,2007 <sup>58</sup>     | Low         | Low                            | Low                                               | Low                             | Low                            | Low                                      |
| Friedman,2008 <sup>60</sup>     | Moderate    | Low                            | Low                                               | Moderate                        | Low                            | Low                                      |
| Friedman,2011 <sup>61</sup>     | High        | Low                            | Low                                               | High                            | Low                            | Low                                      |
| Friedman,2016 <sup>62</sup>     | Low         | Low                            | Low                                               | Low                             | Low                            | Moderate                                 |
| Friedman,2017 <sup>64</sup>     | High        | Low                            | Low                                               | High                            | Moderate                       | Low                                      |
| Friedman,2018 <sup>63</sup>     | Moderate    | Low                            | Moderate                                          | Low                             | Low                            | Moderate                                 |
| Friedman,2020 <sup>65</sup>     | Moderate    | Moderate                       | Low                                               | Low                             | Low                            | Low                                      |
| Fuglsang,2018 <sup>66</sup>     | High        | Low                            | Low                                               | High                            | Moderate                       | Low                                      |
| Gaffigan,2015 <sup>67</sup>     | High        | Low                            | Low                                               | High                            | Low                            | Low                                      |
| Gallagher, 1996 <sup>68</sup>   | Moderate    | Moderate                       | Low                                               | Low                             | Moderate                       | Low                                      |
| Gerhardt,2011 <sup>69</sup>     | High        | Moderate                       | Low                                               | High                            | Moderate                       | Low                                      |
| Goadsby,2019 <sup>70</sup>      | Low         | Low                            | Low                                               | Low                             | Low                            | Low                                      |
| Hakkarainen,1982 <sup>71</sup>  | High        | Moderate                       | Low                                               | High                            | Moderate                       | Low                                      |
| Hoffert, 1992 <sup>72</sup>     | High        | High                           | Low                                               | Low                             | Moderate                       | High                                     |
| Hoffert, 1995 <sup>73</sup>     | High        | Moderate                       | Low                                               | High                            | Moderate                       | Moderate                                 |
| Hokenek, 2020 <sup>74</sup>     | High        | High                           | Low                                               | Low                             | Moderate                       | High                                     |
| Honkaniemi,2006 <sup>75</sup>   | High        | Moderate                       | Low                                               | High                            | Moderate                       | Low                                      |
| Jones,1994 <sup>76</sup>        | High        | Moderate                       | Low                                               | High                            | Moderate                       | Low                                      |
| Jones,1996 <sup>77</sup>        | High        | Moderate                       | Low                                               | High                            | Moderate                       | Low                                      |
| Jones,2019 <sup>78</sup>        | High        | Moderate                       | Moderate                                          | High                            | Low                            | Low                                      |
| Kandil, 2020 <sup>79</sup>      | Moderate    | Low                            | Low                                               | Low                             | Moderate                       | Low                                      |



| Author, Year                         | Overall ROB | ROB from Randomization Process | ROB due to Deviations from Intended Interventions | ROB due to Missing Outcome Data | ROB in Measurement of Outcomes | ROB in Selection of the Reported Results |
|--------------------------------------|-------------|--------------------------------|---------------------------------------------------|---------------------------------|--------------------------------|------------------------------------------|
| Kangasniemi, 1992 <sup>80</sup>      | High        | Moderate                       | Low                                               | High                            | Moderate                       | Low                                      |
| Kapicioglu, 1997 <sup>81</sup>       | High        | Moderate                       | Low                                               | High                            | Moderate                       | High                                     |
| Karimi, 2017 <sup>82</sup>           | Low         | Low                            | Low                                               | Low                             | Low                            | Low                                      |
| Klapper, 1993 <sup>83</sup>          | High        | Moderate                       | Low                                               | High                            | Low                            | Moderate                                 |
| Korucu, 2018 <sup>84</sup>           | High        | Moderate                       | High                                              | High                            | Moderate                       | Low                                      |
| Kuca, 2018 <sup>85</sup>             | Moderate    | Low                            | Low                                               | Moderate                        | Low                            | Low                                      |
| Lane, 1989 <sup>86</sup>             | High        | Moderate                       | Low                                               | High                            | Low                            | Low                                      |
| Levy, 2005 <sup>87</sup>             | High        | Moderate                       | Low                                               | High                            | Moderate                       | Moderate                                 |
| Li, 2009 <sup>88</sup>               | Moderate    | Low                            | Moderate                                          | Low                             | Low                            | Low                                      |
| Lipton, 2000 <sup>89</sup>           | Moderate    | Moderate                       | Low                                               | Low                             | Low                            | Low                                      |
| Lipton, 2010 <sup>90</sup>           | High        | Low                            | Low                                               | High                            | Low                            | Low                                      |
| Lipton, 2019 <sup>91</sup>           | Moderate    | Moderate                       | Low                                               | Low                             | Moderate                       | Low                                      |
| Lipton 2019 <sup>92</sup>            | Low         | Low                            | Low                                               | Low                             | Low                            | Low                                      |
| Maizels, 1996 <sup>93</sup>          | Moderate    | Moderate                       | Low                                               | Moderate                        | Moderate                       | Low                                      |
| Maizels, 1999 <sup>94</sup>          | High        | High                           | Low                                               | Moderate                        | Low                            | Low                                      |
| Marcus, 2008 <sup>95</sup>           | High        | High                           | Moderate                                          | Moderate                        | Low                            | Moderate                                 |
| Marcus, 2014 <sup>96</sup>           | High        | High                           | Low                                               | Low                             | Moderate                       | Low                                      |
| Mazaheri, 2015 <sup>97</sup>         | High        | Low                            | Low                                               | High                            | Low                            | Low                                      |
| McEwen, 1987 <sup>98</sup>           | High        | Moderate                       | Low                                               | High                            | Low                            | Low                                      |
| Meek, 2020 <sup>99</sup>             | High        | Low                            | Low                                               | High                            | Moderate                       | Moderate                                 |
| Miller, 2009 <sup>100</sup>          | Moderate    | Moderate                       | Low                                               | Low                             | Low                            | Low                                      |
| Mitra, 2020 <sup>101</sup>           | Moderate    | Low                            | Moderate                                          | Low                             | Moderate                       | Low                                      |
| Molaie, 1987 <sup>102</sup>          | High        | Moderate                       | Low                                               | High                            | Moderate                       | Moderate                                 |
| Motamed, 2020 <sup>103</sup>         | Moderate    | Moderate                       | Low                                               | Low                             | Low                            | Low                                      |
| Niazi, 2017 <sup>104</sup>           | High        | Moderate                       | Low                                               | High                            | Low                            | Low                                      |
| Prior, 2010 <sup>105</sup>           | Low         | Low                            | Low                                               | Low                             | Low                            | Low                                      |
| Rafieian-Kopaei, 2019 <sup>106</sup> | Moderate    | Moderate                       | Low                                               | Low                             | Moderate                       | Moderate                                 |
| Rapoport, 1995 <sup>107</sup>        | Moderate    | Moderate                       | Low                                               | Low                             | Moderate                       | Moderate                                 |
| Reutens, 1991 <sup>108</sup>         | High        | High                           | Low                                               | High                            | Moderate                       | Low                                      |
| Richman, 2002 <sup>109</sup>         | High        | Moderate                       | Low                                               | High                            | Moderate                       | Low                                      |

| <b>Author, Year</b>               | <b>Overall ROB</b> | <b>ROB from Randomization Process</b> | <b>ROB due to Deviations from Intended Interventions</b> | <b>ROB due to Missing Outcome Data</b> | <b>ROB in Measurement of Outcomes</b> | <b>ROB in Selection of the Reported Results</b> |
|-----------------------------------|--------------------|---------------------------------------|----------------------------------------------------------|----------------------------------------|---------------------------------------|-------------------------------------------------|
| Rowat, 1991 <sup>110</sup>        | Moderate           | Moderate                              | Low                                                      | Moderate                               | Moderate                              | Low                                             |
| Ryan, 1970 <sup>111</sup>         | High               | Moderate                              | Low                                                      | High                                   | High                                  | Moderate                                        |
| Salazar, 2011 <sup>112</sup>      | High               | Moderate                              | Low                                                      | High                                   | Moderate                              | Moderate                                        |
| Scherl, 1995 <sup>113</sup>       | High               | Moderate                              | Low                                                      | High                                   | Moderate                              | Moderate                                        |
| Shahrami, 2015 <sup>114</sup>     | High               | Moderate                              | Low                                                      | High                                   | Moderate                              | Low                                             |
| Sharma, 2002 <sup>115</sup>       | High               | Moderate                              | Low                                                      | High                                   | Moderate                              | Low                                             |
| Silberstein, 2003 <sup>117</sup>  | High               | Low                                   | Low                                                      | High                                   | Low                                   | High                                            |
| Silberstein, 2005 <sup>116</sup>  | High               | Moderate                              | Low                                                      | Low                                    | Low                                   | High                                            |
| Soleimanpour, 2012 <sup>118</sup> | Moderate           | Moderate                              | Low                                                      | Low                                    | Low                                   | Low                                             |
| Stiell, 1991 <sup>119</sup>       | High               | Low                                   | Low                                                      | High                                   | Low                                   | Low                                             |
| Taheraghdam, 2011 <sup>120</sup>  | High               | High                                  | Low                                                      | High                                   | Moderate                              | Low                                             |
| Tanen, 2003 <sup>121</sup>        | Low                | Low                                   | Low                                                      | Low                                    | Low                                   | Low                                             |
| Tassorelli, 2018 <sup>122</sup>   | Low                | Low                                   | Low                                                      | Low                                    | Low                                   | Low                                             |
| Tek, 1990 <sup>123</sup>          | High               | Low                                   | High                                                     | Low                                    | Low                                   | Low                                             |
| Treves, 1998 <sup>124</sup>       | High               | Low                                   | Low                                                      | High                                   | Moderate                              | Low                                             |
| Triner, 1999 <sup>125</sup>       | Moderate           | Moderate                              | Low                                                      | Moderate                               | Low                                   | Low                                             |
| Tulunay, 1987 <sup>126</sup>      | High               | High                                  | Low                                                      | High                                   | Moderate                              | High                                            |
| Voss, 2016 <sup>127</sup>         | Low                | Low                                   | Low                                                      | Low                                    | Low                                   | Low                                             |
| Wang, 2012 <sup>128</sup>         | Moderate           | Moderate                              | Moderate                                                 | Low                                    | Low                                   | Low                                             |
| Yang, 2012 <sup>129</sup>         | High               | Moderate                              | High                                                     | High                                   | Moderate                              | Moderate                                        |
| Yarnitsky, 2017 <sup>130</sup>    | Moderate           | Moderate                              | Low                                                      | Low                                    | Low                                   | Low                                             |
| Yarnitsky, 2019 <sup>131</sup>    | Low                | Low                                   | Low                                                      | Low                                    | Low                                   | Low                                             |
| Zargaran, 2018 <sup>132</sup>     | Moderate           | Moderate                              | Low                                                      | Moderate                               | Low                                   | Low                                             |
| Ziegler, 1994 <sup>133</sup>      | High               | Moderate                              | Low                                                      | High                                   | Moderate                              | Low                                             |

ROB = risk of bias

**eTable 12. Effectiveness of treatments other than triptans and nonsteroidal anti-inflammatory drugs**

|                                                                       | Pain free        | Pain relief          | Sustained pain free | Sustained pain relief | Restored function | Improved function | Sustained restored function | Pain scale       | Function scale |
|-----------------------------------------------------------------------|------------------|----------------------|---------------------|-----------------------|-------------------|-------------------|-----------------------------|------------------|----------------|
| <b>Calcitonin gene-related peptide receptor antagonists (gepants)</b> |                  |                      |                     |                       |                   |                   |                             |                  |                |
| Rimegepant vs. Placebo                                                | Moderate SOE     | Moderate SOE         | Moderate SOE        | Moderate SOE          | Moderate SOE      |                   | Moderate SOE                |                  |                |
| Ubrogepant vs. Placebo                                                | High SOE         | High SOE             | Low to high SOE     | Low to moderate SOE   | High SOE          |                   |                             |                  |                |
| <b>5-HT<sub>1F</sub> receptor agonists (ditans)</b>                   |                  |                      |                     |                       |                   |                   |                             |                  |                |
| Lasmiditan vs. Placebo                                                | High SOE         | High SOE             | High SOE            | High SOE              | High SOE          |                   |                             | Moderate SOE     | High SOE       |
| <b>Ergot Alkaloids</b>                                                |                  |                      |                     |                       |                   |                   |                             |                  |                |
| Dihydroergotamine vs. Chlorpromazine                                  | Insufficient SOE |                      |                     |                       |                   |                   |                             |                  |                |
| Dihydroergotamine vs. Lidocaine                                       | Insufficient SOE |                      |                     |                       |                   |                   |                             |                  |                |
| Dihydroergotamine vs. Placebo                                         | Moderate SOE     | Moderate to high SOE | High SOE            | High SOE              | Moderate SOE      |                   |                             | Insufficient SOE |                |

|                                                                          | Pain free        | Pain relief  | Sustained pain free | Sustained pain relief | Restored function | Improved function | Sustained restored function | Pain scale       | Function scale |
|--------------------------------------------------------------------------|------------------|--------------|---------------------|-----------------------|-------------------|-------------------|-----------------------------|------------------|----------------|
| Ergotamine plus caffeine vs. Placebo                                     | Low SOE          | Moderate SOE |                     |                       |                   | Low SOE           |                             | Insufficient SOE |                |
| <b>Antiemetics</b>                                                       |                  |              |                     |                       |                   |                   |                             |                  |                |
| Chlorpromazine vs. Placebo                                               | Low SOE          | Low SOE      |                     |                       |                   | Insufficient SOE  |                             |                  |                |
| Diphenhydramine plus metoclopramide vs. Diphenhydramine plus haloperidol |                  |              |                     |                       |                   |                   |                             | Insufficient     |                |
| Droperidol vs. Placebo                                                   | Low SOE          | Low SOE      |                     |                       |                   |                   |                             |                  |                |
| Granisetron vs. Placebo                                                  | Insufficient SOE |              |                     |                       |                   |                   |                             | Insufficient SOE |                |
| Haloperidol vs. Placebo                                                  |                  | Low SOE      |                     |                       |                   |                   |                             |                  |                |
| Magnesium sulfate vs. Dexamethasone                                      |                  |              |                     |                       |                   |                   |                             | Low SOE          |                |

|                                                          | Pain free        | Pain relief      | Sustained pain free | Sustained pain relief | Restored function | Improved function | Sustained restored function | Pain scale       | Function scale |
|----------------------------------------------------------|------------------|------------------|---------------------|-----------------------|-------------------|-------------------|-----------------------------|------------------|----------------|
| plus metoclopramide                                      |                  |                  |                     |                       |                   |                   |                             |                  |                |
| Metoclopramide vs. Chlorpromazine                        | Insufficient SOE | Insufficient SOE |                     |                       |                   |                   |                             | Insufficient SOE |                |
| Metoclopramide vs. Diphenhydramine plus metoclopramide   |                  |                  | Low SOE             | Low SOE               |                   |                   |                             | Low SOE          |                |
| Metoclopramide vs. Granisetron                           |                  |                  |                     |                       |                   |                   |                             | Low SOE          |                |
| Metoclopramide vs. Magnesium sulfate                     |                  |                  |                     |                       |                   |                   |                             | Insufficient SOE |                |
| Metoclopramide vs. Magnesium sulfate plus metoclopramide |                  | Low SOE          |                     |                       | Low SOE           |                   |                             | Insufficient SOE |                |
| Metoclopramide vs. Placebo                               | Insufficient SOE | Low SOE          |                     |                       |                   |                   |                             | Insufficient SOE |                |

|                                               | Pain free | Pain relief      | Sustained pain free | Sustained pain relief | Restored function       | Improved function | Sustained restored function | Pain scale       | Function scale |
|-----------------------------------------------|-----------|------------------|---------------------|-----------------------|-------------------------|-------------------|-----------------------------|------------------|----------------|
| Prochlorperazine vs. Ergotamine plus caffeine |           |                  |                     |                       |                         |                   |                             | Insufficient SOE |                |
| Prochlorperazine vs. Magnesium sulfate        |           |                  |                     |                       |                         |                   |                             | Insufficient SOE |                |
| Prochlorperazine vs. Metoclopramide           | Low SOE   | Insufficient SOE | Insufficient SOE    | Insufficient SOE      |                         |                   |                             | Insufficient SOE |                |
| Prochlorperazine vs. Octreotide               |           | Low SOE          |                     |                       |                         |                   |                             | Low SOE          |                |
| Prochlorperazine vs. Placebo                  | Low SOE   | Low SOE          |                     |                       |                         |                   |                             | Low SOE          |                |
| Prochlorperazine vs. Valproate                |           |                  |                     |                       |                         |                   |                             | Low SOE          |                |
| <b>Opioids</b>                                |           |                  |                     |                       |                         |                   |                             |                  |                |
| Butorphanol vs. Placebo                       | Low SOE   | Low SOE          |                     |                       |                         |                   |                             |                  |                |
| Hydromorphone vs. Diphenhydramine             | Low SOE   |                  | Low SOE             | Low SOE               | Insufficient to low SOE |                   |                             |                  |                |

|                                                                       | Pain free        | Pain relief      | Sustained pain free | Sustained pain relief | Restored function | Improved function | Sustained restored function | Pain scale       | Function scale |
|-----------------------------------------------------------------------|------------------|------------------|---------------------|-----------------------|-------------------|-------------------|-----------------------------|------------------|----------------|
| plus prochlorperazine                                                 |                  |                  |                     |                       |                   |                   |                             |                  |                |
| Meperidine plus dimenhydrinate vs. Chlorpromazine                     |                  | Insufficient SOE |                     |                       |                   |                   |                             | Low SOE          |                |
| Meperidine plus hydroxyzine vs. Dihydroergotamine plus metoclopramide |                  | Low SOE          |                     |                       | Low SOE           |                   |                             | Insufficient SOE |                |
| Meperidine vs. Droperidol                                             |                  | Insufficient SOE |                     |                       |                   |                   |                             |                  |                |
| Methotrimeprazine vs. Dimenhydrinate plus meperidine                  |                  |                  |                     |                       |                   |                   |                             | Insufficient SOE |                |
| Morphine vs. Intravenous dexamethasone                                |                  |                  |                     |                       |                   |                   |                             | Low SOE          |                |
| Tramadol vs. Placebo                                                  | Insufficient SOE | Insufficient SOE |                     |                       |                   |                   |                             | Insufficient SOE |                |

|                                          | Pain free               | Pain relief             | Sustained pain free | Sustained pain relief | Restored function | Improved function | Sustained restored function | Pain scale       | Function scale   |
|------------------------------------------|-------------------------|-------------------------|---------------------|-----------------------|-------------------|-------------------|-----------------------------|------------------|------------------|
| Tramadol plus acetaminophen vs. Placebo  | Low SOE                 | Low SOE                 | Low SOE             | Low SOE               |                   |                   |                             |                  |                  |
| <b>Other pharmacologic interventions</b> |                         |                         |                     |                       |                   |                   |                             |                  |                  |
| Acetaminophen vs. Placebo                | Moderate SOE            | Moderate SOE            |                     |                       | Moderate SOE      |                   |                             | Moderate SOE     | Moderate SOE     |
| Dexamethasone vs. Placebo                | Low SOE                 |                         | Low SOE             |                       | Low SOE           |                   |                             |                  |                  |
| Greater occipital nerve block vs. Sham   | Insufficient SOE        | Insufficient SOE        |                     |                       |                   |                   |                             | Insufficient SOE |                  |
| Ketamine vs. Placebo                     |                         | Insufficient SOE        |                     |                       |                   |                   |                             | Insufficient SOE | Insufficient SOE |
| Lidocaine vs. Chlorpromazine             | Low SOE                 |                         |                     |                       |                   |                   |                             |                  |                  |
| Lidocaine vs. Placebo                    | Insufficient SOE        | Low SOE                 |                     |                       |                   |                   |                             | Insufficient SOE | Insufficient SOE |
| Magnesium sulfate vs. Placebo            | Insufficient to low SOE | Insufficient to low SOE |                     |                       |                   |                   |                             |                  |                  |



|                                                | Pain free        | Pain relief      | Sustained pain free | Sustained pain relief | Restored function | Improved function | Sustained restored function | Pain scale              | Function scale |
|------------------------------------------------|------------------|------------------|---------------------|-----------------------|-------------------|-------------------|-----------------------------|-------------------------|----------------|
| Octreotide vs. Placebo                         |                  | Low SOE          |                     |                       |                   |                   |                             | Low SOE                 |                |
| Propofol vs. standard therapy                  |                  |                  |                     |                       |                   |                   |                             | Insufficient SOE        |                |
| Propofol vs. Placebo                           | Insufficient SOE | Insufficient SOE | Insufficient SOE    |                       |                   |                   |                             | Insufficient SOE        |                |
| Propofol vs. Dexamethasone                     |                  |                  |                     |                       |                   |                   |                             | Low SOE                 |                |
| Secobarbital vs. Placebo                       |                  | Insufficient SOE |                     |                       |                   |                   |                             | Insufficient SOE        |                |
| Valproate vs. Dexamethasone                    | Insufficient SOE | Low SOE          |                     |                       |                   |                   |                             | Insufficient SOE        |                |
| <b>Nonpharmacologic (non-drug) Therapy</b>     |                  |                  |                     |                       |                   |                   |                             |                         |                |
| Acupuncture vs. Sham                           | Low SOE          | Low SOE          | Insufficient SOE    |                       |                   |                   |                             | Insufficient to low SOE |                |
| External trigeminal nerve stimulation vs. Sham | Low SOE          | Low SOE          | Low SOE             | Low SOE               |                   |                   |                             | Low to moderate SOE     |                |

|                                                          | <b>Pain free</b> | <b>Pain relief</b> | <b>Sustained pain free</b> | <b>Sustained pain relief</b> | <b>Restored function</b> | <b>Improved function</b> | <b>Sustained restored function</b> | <b>Pain scale</b>       | <b>Function scale</b> |
|----------------------------------------------------------|------------------|--------------------|----------------------------|------------------------------|--------------------------|--------------------------|------------------------------------|-------------------------|-----------------------|
| Eye movement desensitization reprocessing vs. Usual care | Low SOE          |                    |                            |                              |                          |                          |                                    | Insufficient to low SOE |                       |
| Transcranial magnetic stimulation vs. Sham               | Low SOE          | Insufficient SOE   | Insufficient SOE           |                              |                          |                          |                                    |                         |                       |
| Noninvasive vagus nerve stimulation vs. Sham             | Low SOE          | Moderate SOE       |                            |                              |                          |                          |                                    |                         |                       |
| Remote electrical neuromodulation vs. Sham               | Moderate SOE     | Moderate SOE       | Moderate SOE               | Moderate SOE                 |                          |                          |                                    |                         |                       |

SOE = strength of evidence

\*Green indicates statistically significant better outcome when the intervention was compared with the control; red indicates statistically significant worse outcome; and white shows no statistically significant difference.

**eFigure 1. Findings of Meta-analysis of 5-HT<sub>1F</sub> Receptor Agonists on Pain and Function Outcomes measured as Continuous Outcomes for Episodic Migraine in Adults**

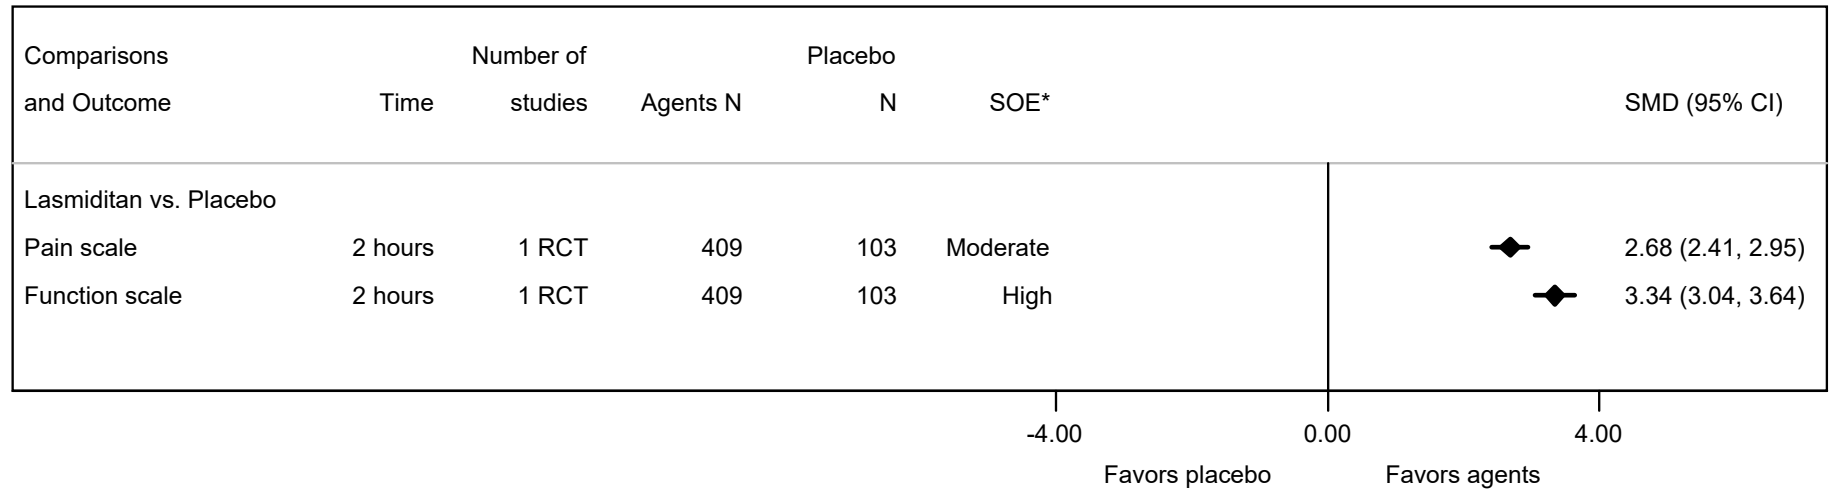

eTable 6 in the supplement lists definitions of strength of evidence (SOE) and approaches used to grade SOE.  
 CI = confidence interval; RCT = randomized clinical trial; SMD = standardized mean difference; SOE = strength of evidence

**eFigure 2. Findings of Meta-analysis of Antiemetics on Pain Outcomes measured as Continuous Outcomes for Episodic Migraine in Adults**

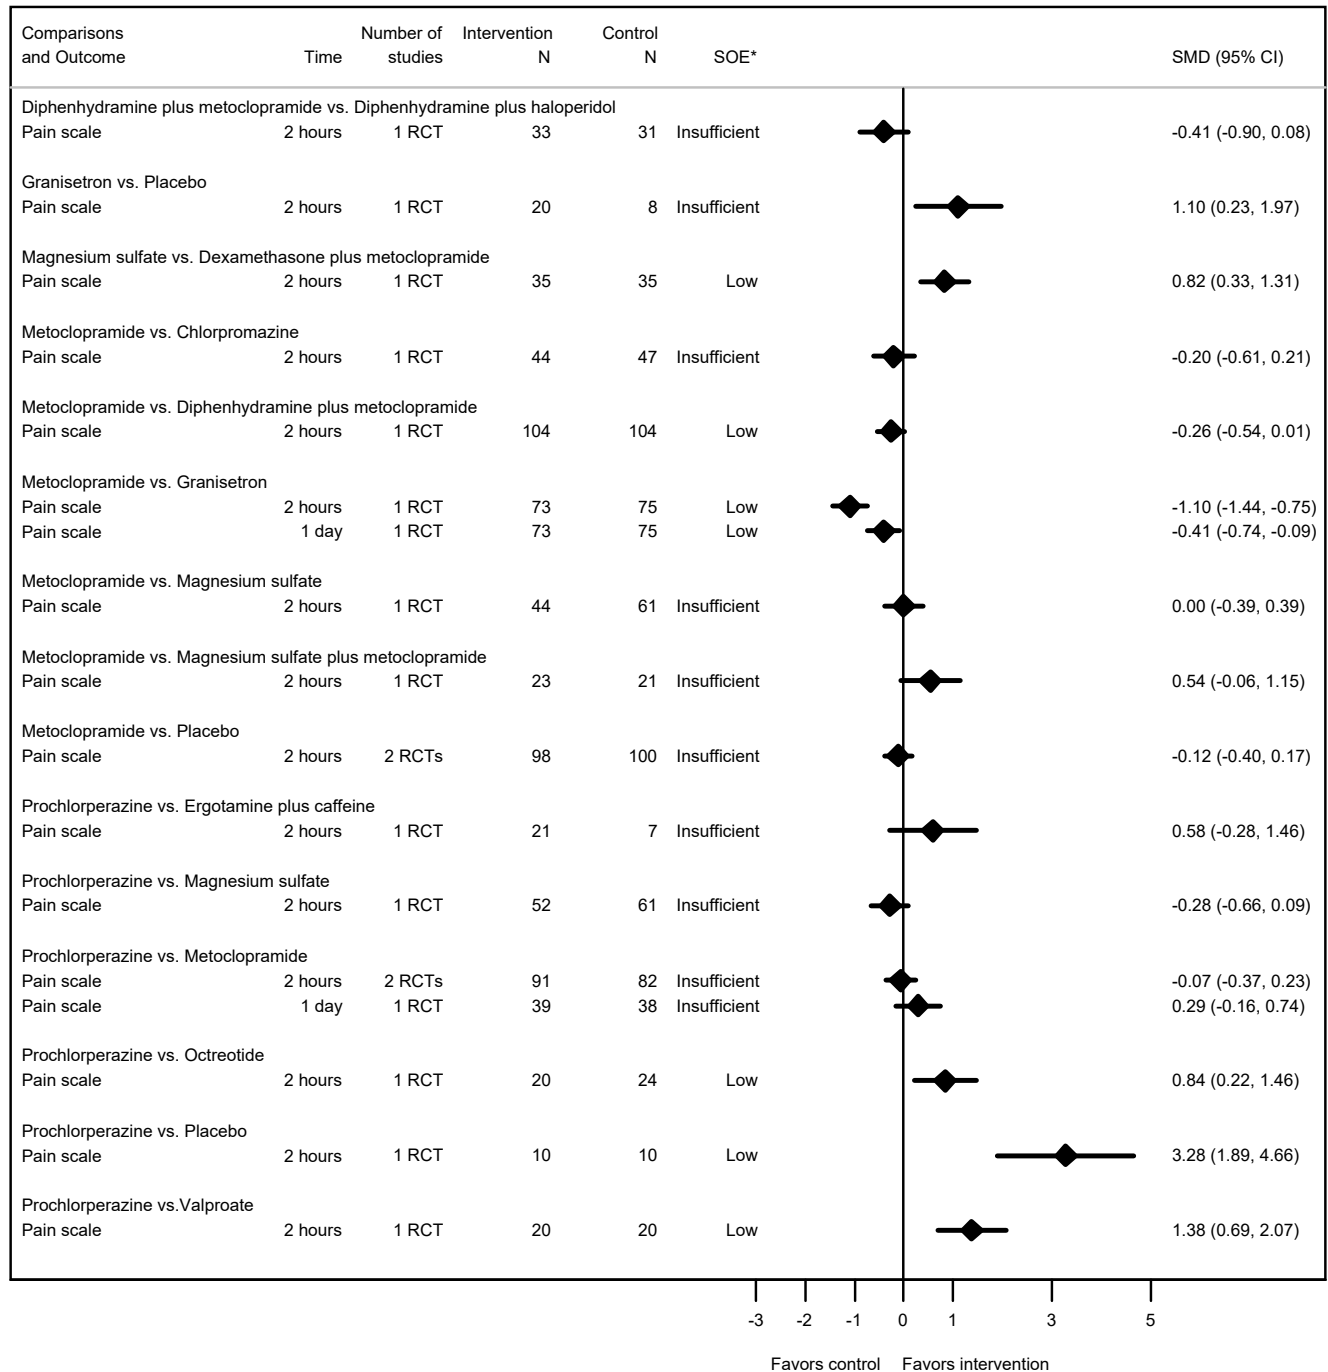

eTable 6 in the supplement lists definitions of strength of evidence (SOE) and approaches used to grade SOE.  
 CI = confidence interval; RCT = randomized clinical trial; SMD = standardized mean difference; SOE = strength of evidence

**eFigure 3. Findings of Meta-analysis of Ergot Alkaloids on Pain and Function Outcomes measured as Binary Outcomes for Episodic Migraine in Adults**

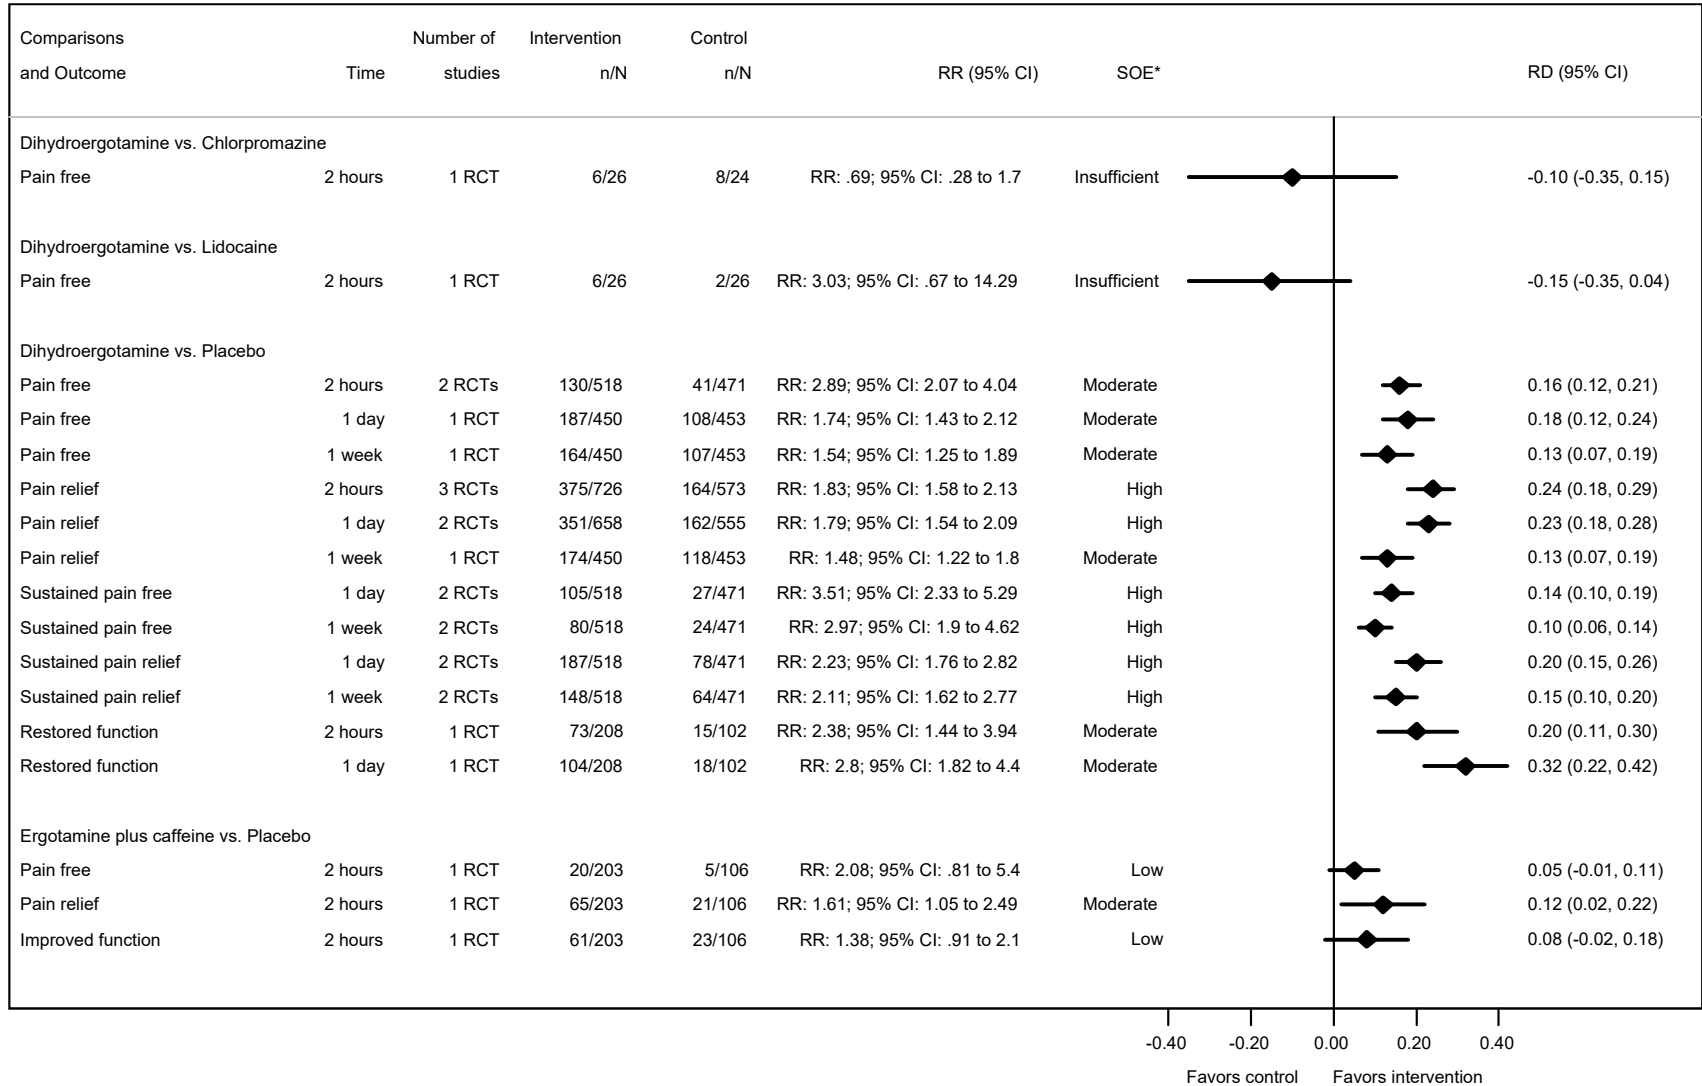

eTable 3 in the supplement lists definitions of outcomes.

eTable 6 in the supplement lists definitions of strength of evidence (SOE) and approaches used to grade SOE.

CI = confidence interval; RCT = randomized clinical trial; RD = risk difference; RR = relative risk; SOE = strength of evidence

**eFigure 4. Findings of Meta-analysis of Ergot Alkaloids on Pain Outcomes measured as Continuous Outcomes for Episodic Migraine in Adults**

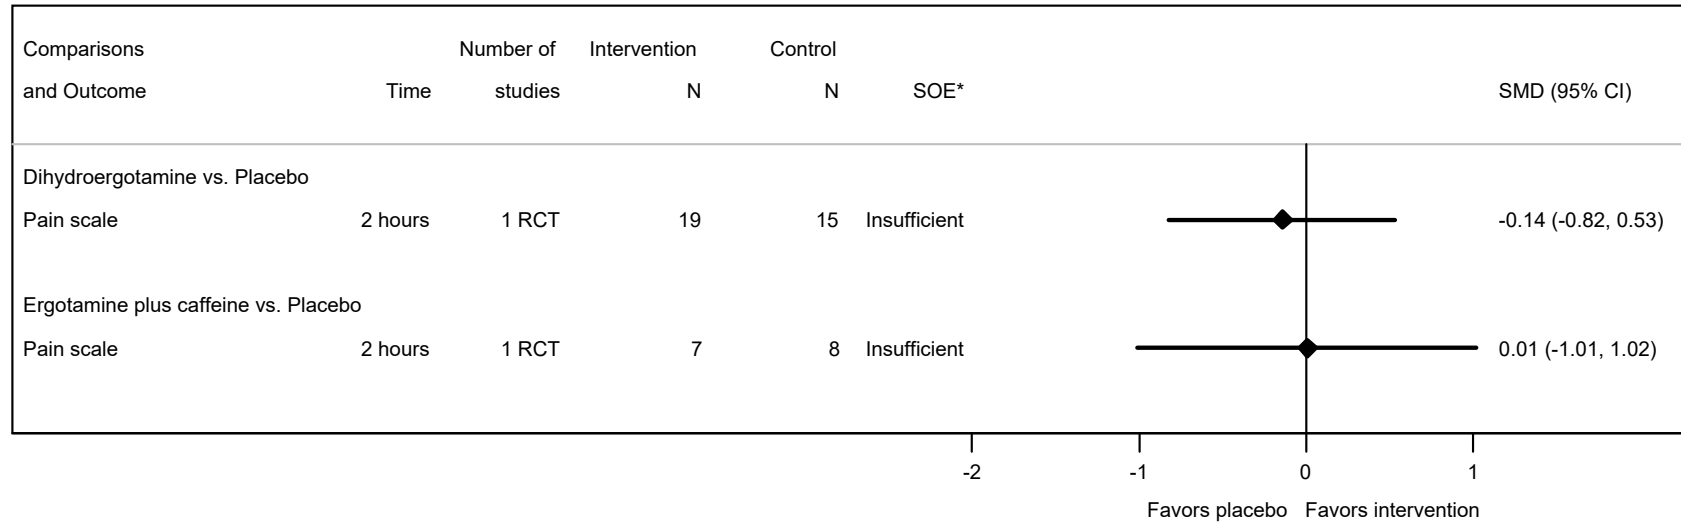

eTable 6 in the supplement lists definitions of strength of evidence (SOE) and approaches used to grade SOE.  
 CI = confidence interval; RCT = randomized clinical trial; SMD = standardized mean difference; SOE = strength of evidence

# eFigure 5. Findings of Meta-analysis of Opioids on Pain and Function Outcomes measured as Binary Outcomes for Episodic Migraine in Adults

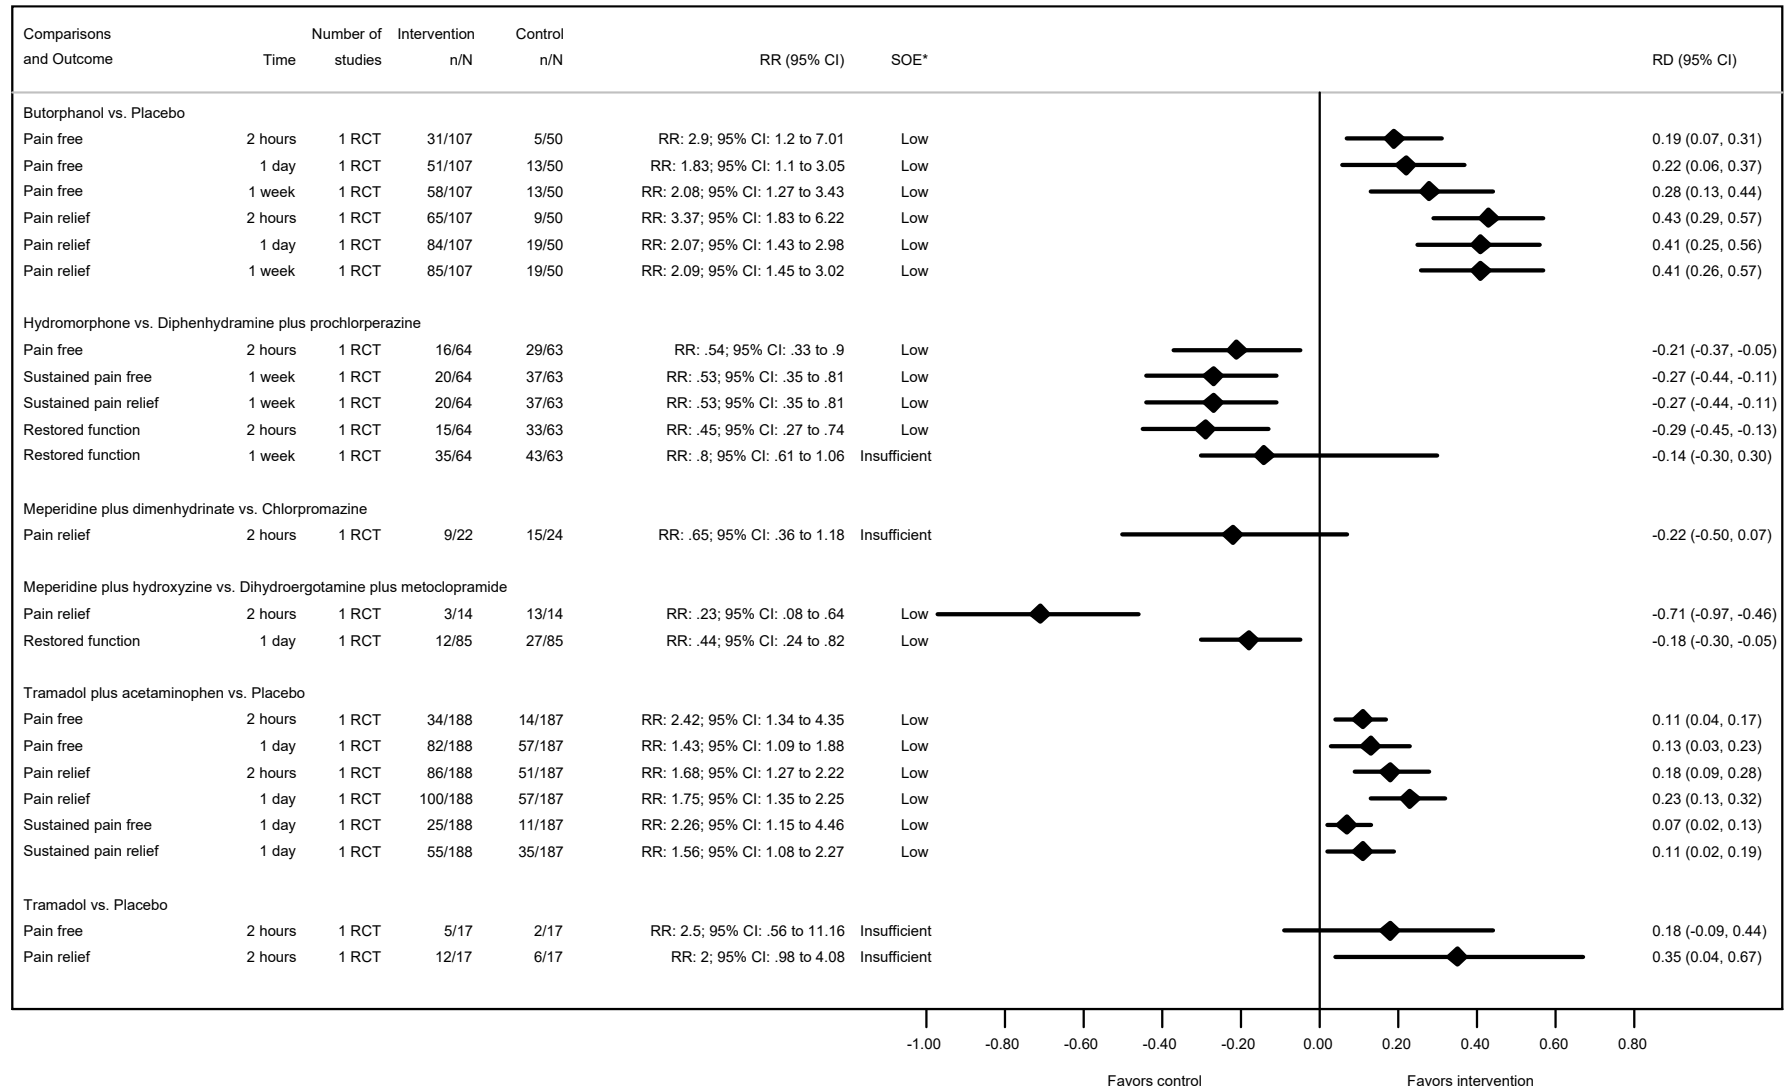

eTable 3 in the supplement lists definitions of outcomes.

eTable 6 in the supplement lists definitions of strength of evidence (SOE) and approaches used to grade SOE.

CI = confidence interval; RCT = randomized clinical trial; RD = risk difference; RR = relative risk; SOE = strength of evidence

**eFigure 6. Findings of Meta-analysis of Opioids on Pain Outcomes measured as Continuous Outcomes for Episodic Migraine in Adults**

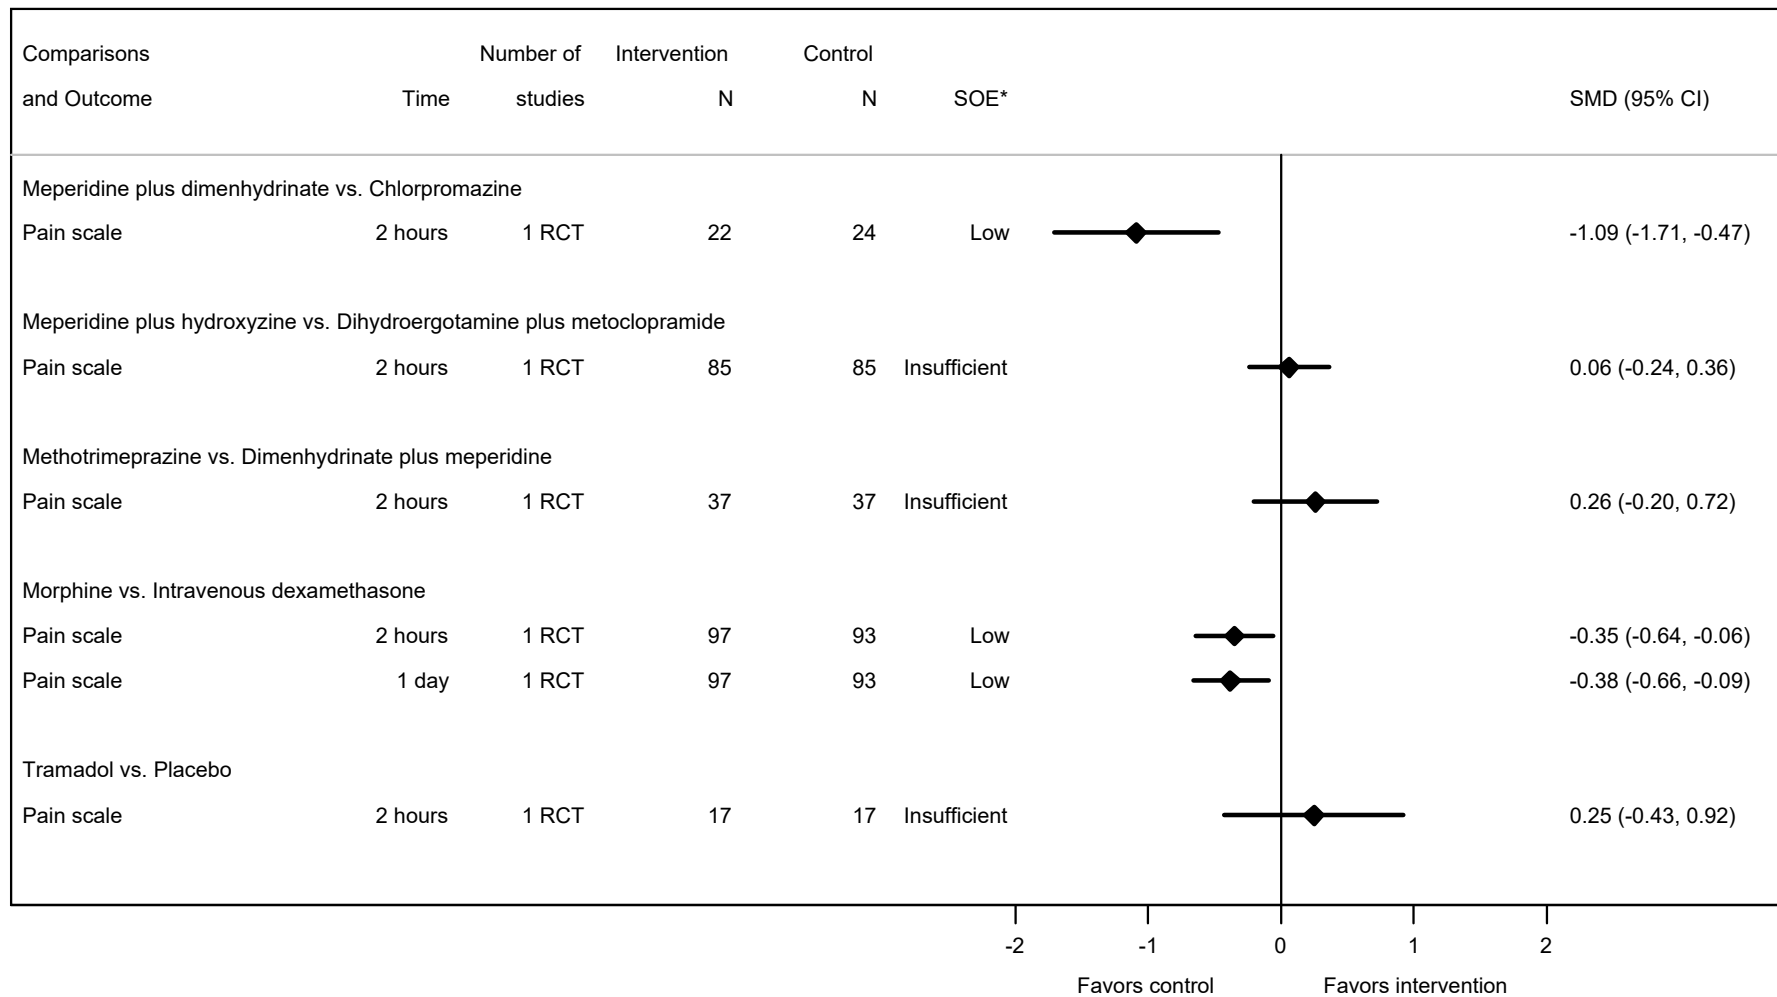

eTable 6 in the supplement lists definitions of strength of evidence (SOE) and approaches used to grade SOE.  
 CI = confidence interval; RCT = randomized clinical trial; SMD = standardized mean difference; SOE = strength of evidence



**eFigure 7. Findings of Meta-analysis of Other Pharmacological Interventions on Pain and Function Outcomes measured as Binary Outcomes for Episodic Migraine in Adults**

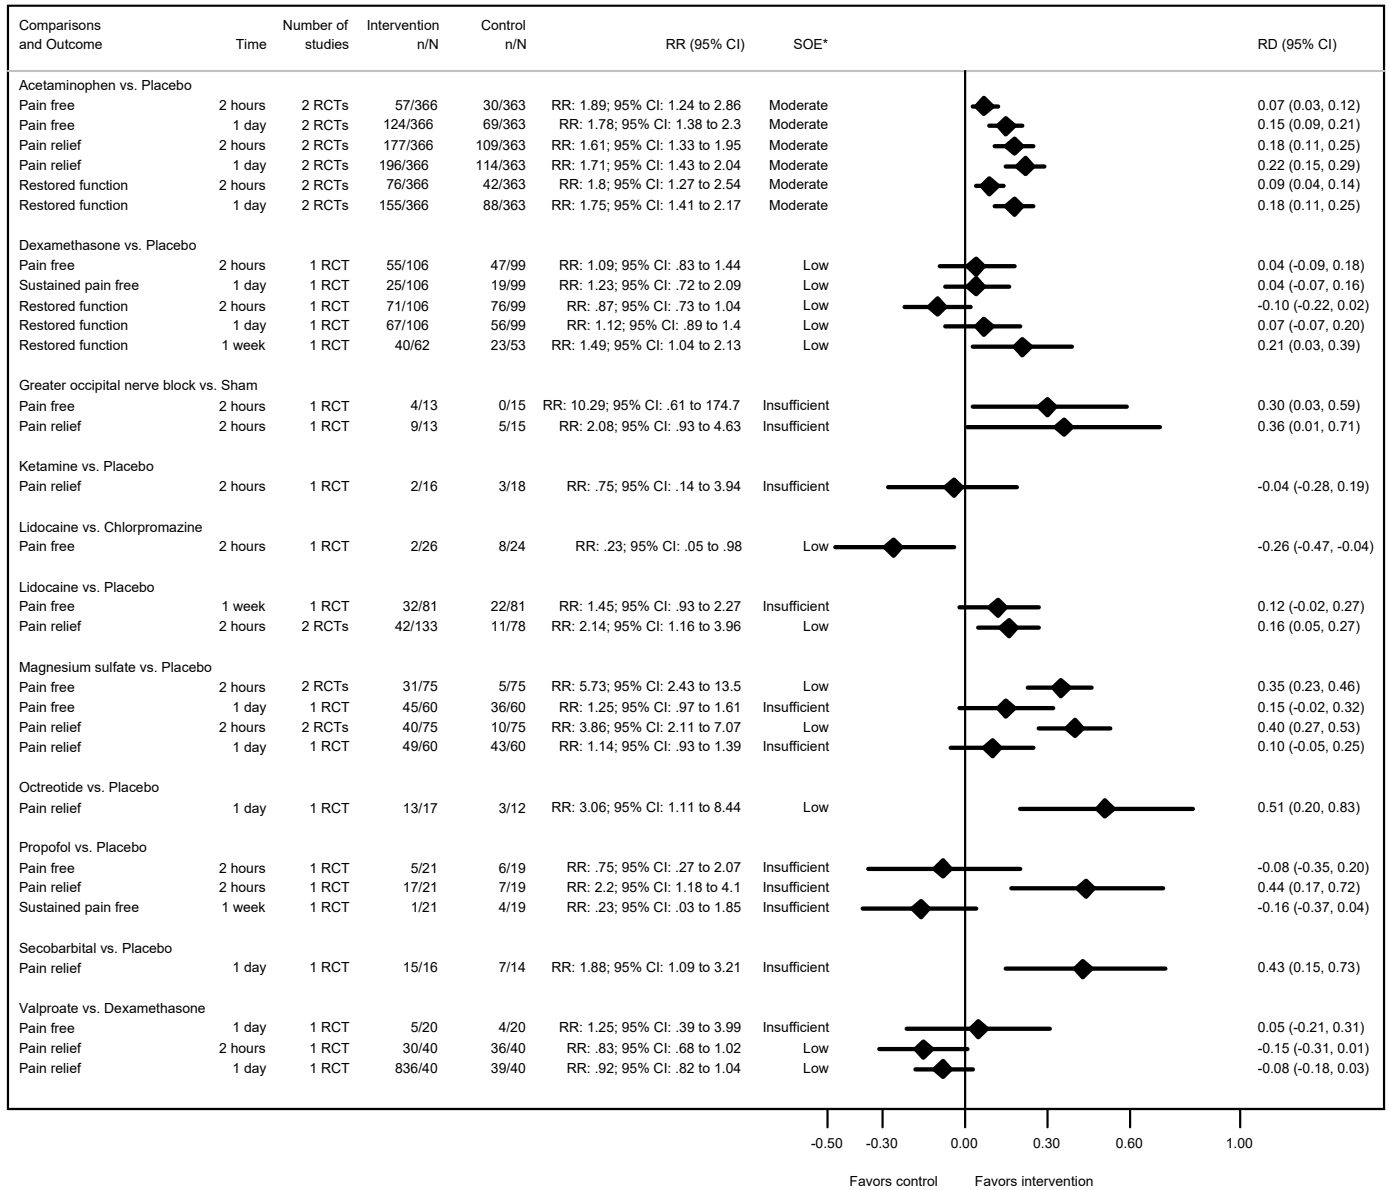

eTable 3 in the supplement lists definitions of outcomes.

eTable 6 in the supplement lists definitions of strength of evidence (SOE) and approaches used to grade SOE.

CI = confidence interval; RCT = randomized clinical trial; RD = risk difference; RR = relative risk; SOE = strength of evidence

### eFigure 8. Findings of Meta-analysis of Other Pharmacological Interventions on Pain and Function Outcomes measured as Continuous Outcomes for Episodic Migraine in Adults

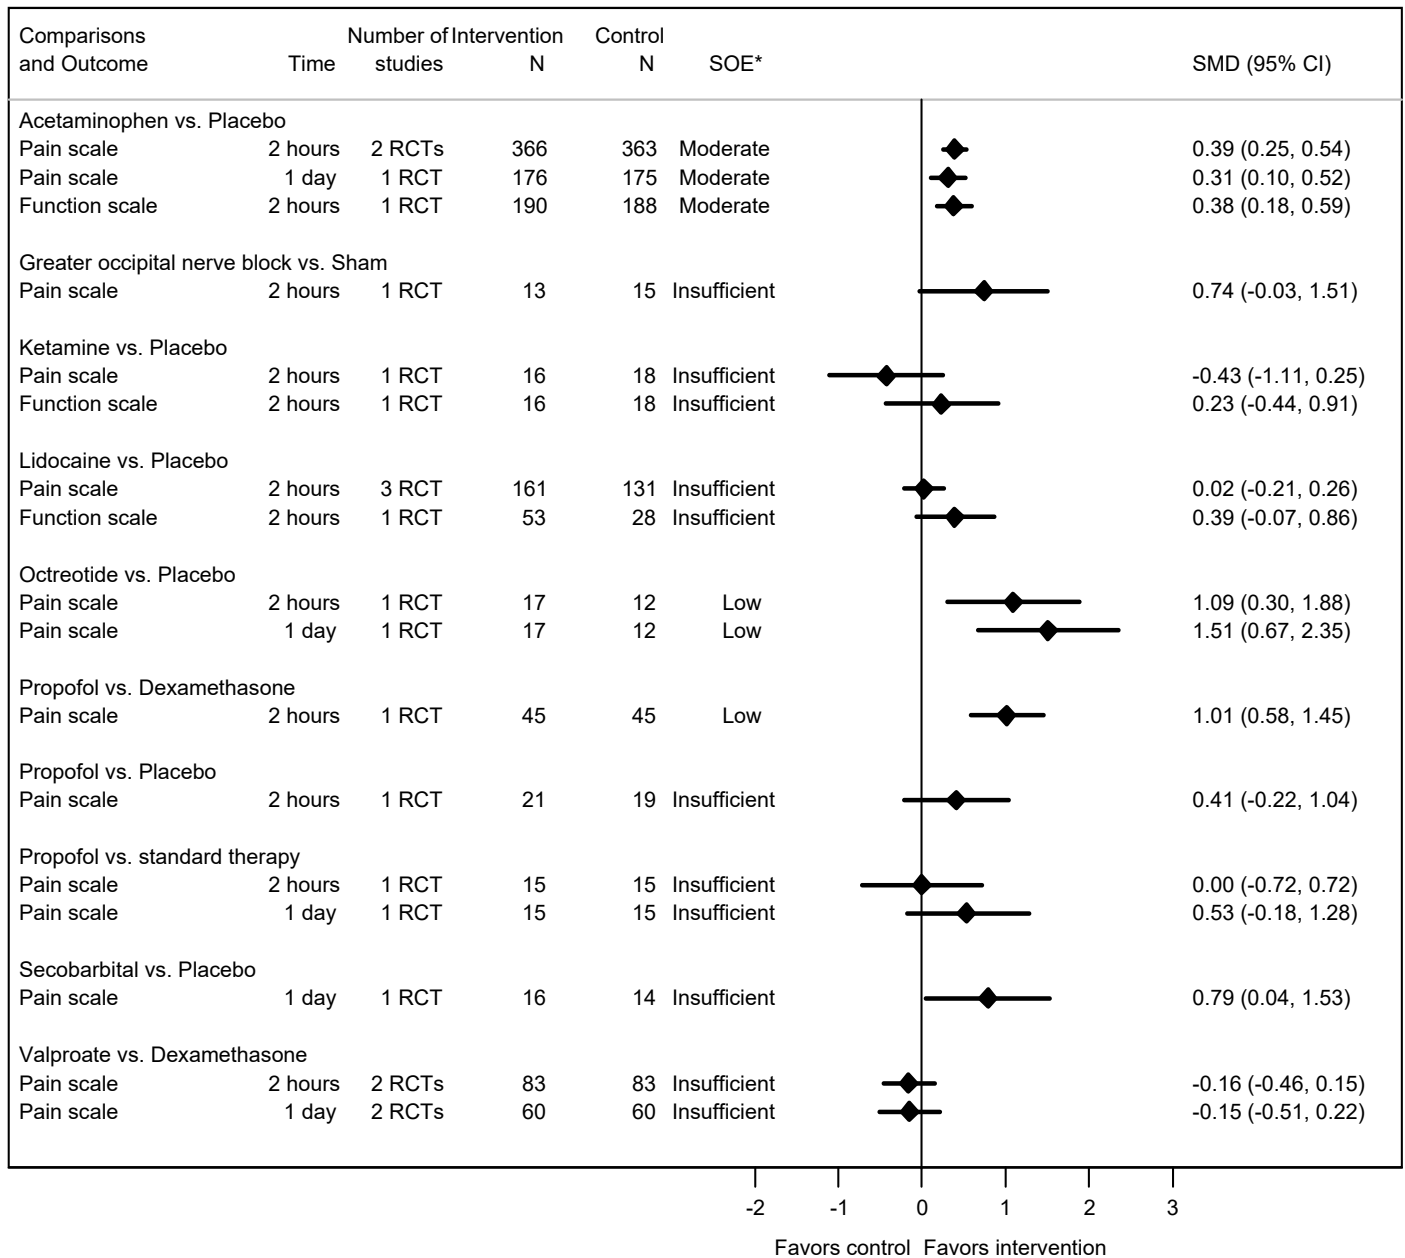

eTable 6 in the supplement lists definitions of strength of evidence (SOE) and approaches used to grade SOE.  
 CI = confidence interval; RCT = randomized clinical trial; SMD = standardized mean difference; SOE = strength of evidence

**eFigure 9. Findings of Meta-analysis of Nonpharmacological Interventions on Pain Outcomes measured as Binary Outcomes for Episodic Migraine in Adults**

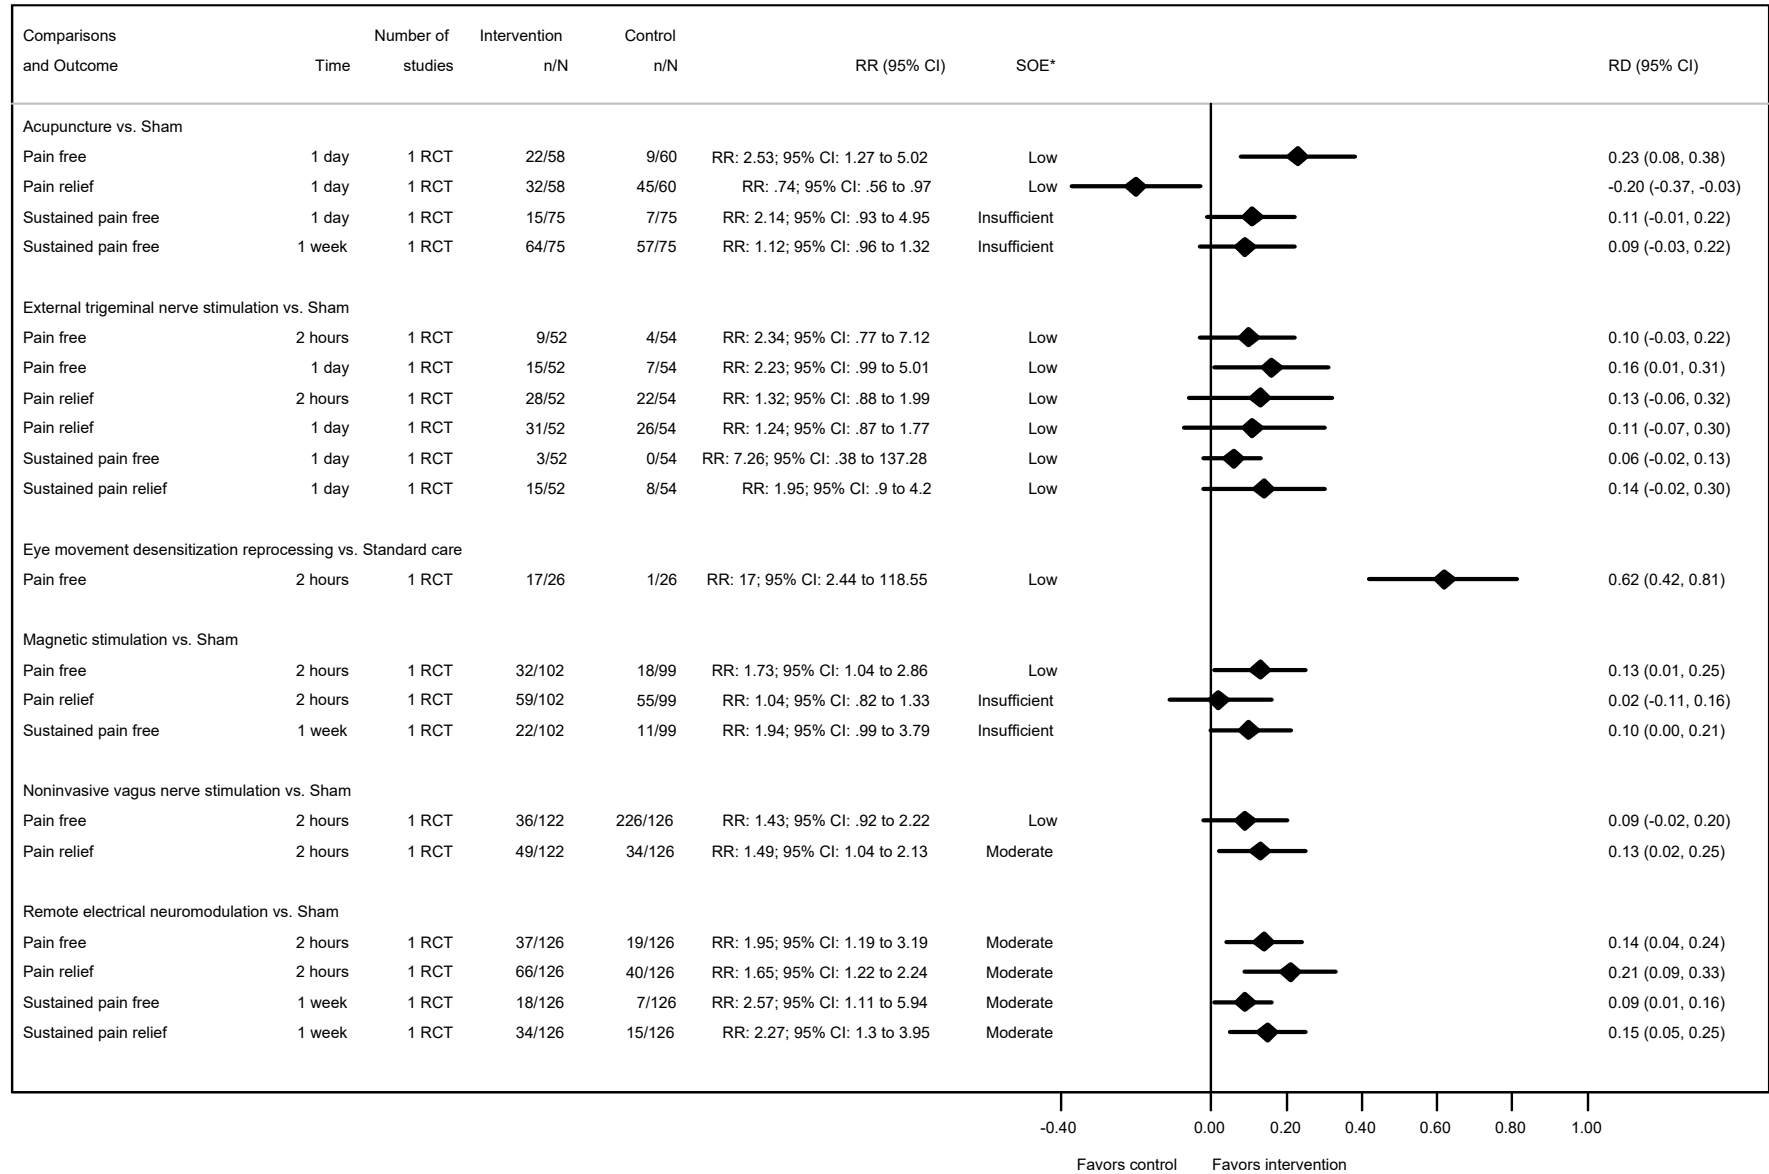

eTable 3 in the supplement lists definitions of outcomes.

eTable 6 in the supplement lists definitions of strength of evidence (SOE) and approaches used to grade SOE.

CI = confidence interval; RCT = randomized clinical trial; RD = risk difference; RR = relative risk; SOE = strength of evidence

**eFigure 10. Findings of Meta-analysis of Nonpharmacological Interventions on Pain Outcomes measured as Continuous Outcomes for Episodic Migraine in Adults**

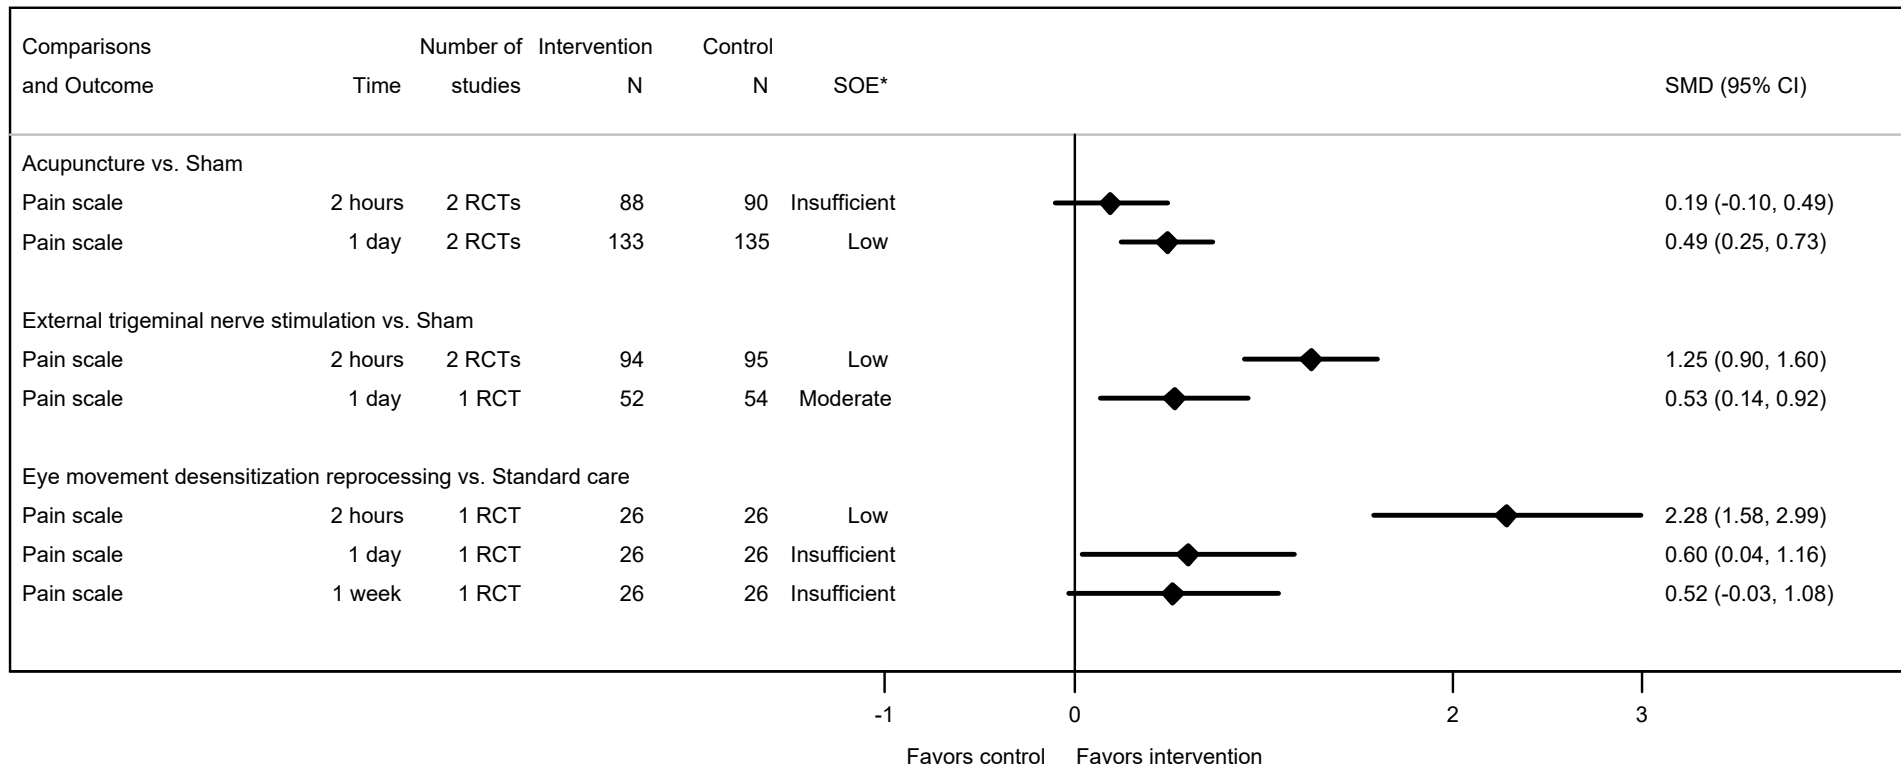

eTable 6 in the supplement lists definitions of strength of evidence (SOE) and approaches used to grade SOE.  
 CI = confidence interval; RCT = randomized clinical trial; SMD = standardized mean difference; SOE = strength of evidence

## References

1. Agency for Healthcare Research and Quality. Methods Guide for Effectiveness and Comparative Effectiveness Reviews. Agency for Healthcare Research and Quality; 2014.
2. Ashcroft DM, Millson D. Naratriptan for the treatment of acute migraine: meta-analysis of randomised controlled trials. *Pharmacoepidemiol Drug Saf.* 2004;13(2):73-82. Medline:14998068 doi:10.1002/pds.890
3. Bird S, Derry S, Moore RA. Zolmitriptan for acute migraine attacks in adults. *Cochrane Database Syst Rev.* 2014;2014 (5) :CD008616. Medline:24848613 doi:10.1002/14651858.CD008616.pub2
4. Chen L-C, Ashcroft DM. Meta-analysis examining the efficacy and safety of almotriptan in the acute treatment of migraine. *Headache.* 2007;47(8):1169-1177. Medline:17883521 doi:10.1111/j.1526-4610.2007.00884.x
5. Cady R. Almotriptan reduces the incidence of migraine-associated symptoms: a pooled analysis. *Headache.* 2002;42 Suppl 1:26-31. Medline: 11966861 doi: 10.1046/j.1526-4610.2002.0420s1026.x
6. Dahlof CG, Pascual J, Dodick DW, Dowson AJ. Efficacy, speed of action and tolerability of almotriptan in the acute treatment of migraine: pooled individual patient data from four randomized, double-blind, placebo-controlled clinical trials. *Cephalalgia.* 2006;26(4):400-408. Medline: 16556240 doi: 10.1111/j.1468-2982.2005.01080.x
7. Derry CJ, Derry S, Moore RA. Sumatriptan (oral route of administration) for acute migraine attacks in adults. *Cochrane Database of Systematic Reviews.* 2012(2):CD008615. Medline:22336849 doi:10.1002/14651858.CD008615.pub2
8. Derry CJ, Derry S, Moore RA. Sumatriptan (subcutaneous route of administration) for acute migraine attacks in adults. *The Cochrane database of systematic reviews.* 2012;2012(2):Cd009665. Medline:22336869 doi:10.1002/14651858.CD009665
9. Ferrari M, Loder E, McCarroll K, Lines C. Meta-analysis of rizatriptan efficacy in randomized controlled clinical trials. *Cephalalgia.* 2001;21(2):129-136. Medline:11422095 doi:10.1046/j.1468-2982.2001.00169.x
10. Mandema JW, Cox E, Alderman J. Therapeutic benefit of eletriptan compared to sumatriptan for the acute relief of migraine pain--results of a model-based meta-analysis that accounts for encapsulation. *Cephalalgia.* 2005;25(9):715-725. Medilene: 16109054 doi: 10.1111/j.1468-2982.2004.00939.x
11. Menshawy A, Ahmed H, Ismail A, et al. Intranasal sumatriptan for acute migraine attacks: a systematic review and meta-analysis. *Neurol Sci.* 2018;39(1):31-44. Medline: 28942578 doi: 10.1007/s10072-017-3119-y
12. Poolsup N, Leelasangaluk V, Jittangtrong J, Rithlamlert C, Ratanapantamane N, Khanthong M. Efficacy and tolerability of frovatriptan in acute migraine treatment: systematic review of randomized controlled trials. *J Clin Pharm Ther.* 2005;30(6):521-532. Medline:16336284 doi:10.1111/j.1365-2710.2005.00677.x
13. Derry S, Rabbie R, Moore RA. Diclofenac with or without an antiemetic for acute migraine headaches in adults. *Cochrane Database of Systematic Reviews.* 2013(4):CD008783. Medline:23633360 doi:10.1002/14651858.CD008783.pub3

14. Kirthi V, Derry S, Moore RA. Aspirin with or without an antiemetic for acute migraine headaches in adults. *Cochrane Database of Systematic Reviews*. 2013(4): CD008041. Medline:23633350 doi:10.1002/14651858.CD008041.pub
15. Rabbie R, Derry S, Moore RA. Ibuprofen with or without an antiemetic for acute migraine headaches in adults. *The Cochrane database of systematic reviews*. 2013;2013(4):Cd008039. Medline:23633348 doi:10.1002/14651858.CD008039.pub3
16. Taggart E, Doran S, Kokotillo A, Campbell S, Villa-Roel C, Rowe BH. Ketorolac in the treatment of acute migraine: a systematic review. *Headache*. 2013;53(2):277-287. Medline: 23298250 doi: 10.1111/head.12009
17. Law S, Derry S, Moore RA. Sumatriptan plus naproxen for the treatment of acute migraine attacks in adults. *The Cochrane database of systematic reviews*. 2016;4(4):Cd008541. Medline:27096438 doi:10.1002/14651858.CD008541.pub3
18. Xu H, Han W, Wang J, Li M. Network meta-analysis of migraine disorder treatment by NSAIDs and triptans. *J Headache Pain*. 2016;17(1):113. Medline: 27957624 doi: 10.1186/s10194-016-0703-0
19. Aggarwal D, Heim AJ, Bittel B, et al. A Randomized, Double-Blinded, Placebo-Controlled, Cross Over Study Evaluating the Efficacy and Safety of Timolol Ophthalmic Solution as an Acute Treatment of Migraine. *Kans J Med*. 2020;13(Suppl 2):2-5. Medline: 32256967
20. Alemdar M, Pekdemir M, Selekler HM. Single-dose intravenous tramadol for acute migraine pain in adults: a single-blind, prospective, randomized, placebo-controlled clinical trial. *Clin Ther*. 2007;29(7):1441-1447. Medline:17825695 doi:10.1016/j.clinthera.2007.07.017
21. Amiri H, Ghodrati N, Nikuyeh M, Shams-Vahdati S, Jalilzadeh-Binazar M. Comparison of granisetron and metoclopramide in the treatment of pain and emesis in migraine patients: a randomized controlled trial study. *Turk J Emerg Med*. 2017;17(2):61-64. Medline:28616617 doi:10.1016/j.tjem.2016.12.004
22. Antal A, Bischoff R, Stephani C, et al. Low Intensity, Transcranial, Alternating Current Stimulation Reduces Migraine Attack Burden in a Home Application Set-Up: A Double-Blinded, Randomized Feasibility Study. *Brain sci*. 2020;10(11):21. Medline:33233400 doi:10.3390/brainsci10110888
23. Ashina M, Reuter U, Smith T, et al. Randomized, controlled trial of lasmiditan over four migraine attacks: findings from the CENTURION study. *Cephalalgia*. 2021;333102421989232. Medline:33541117 doi:10.1177/0333102421989232
24. Aurora SK, Silberstein SD, Kori SH, et al. MAP0004, orally inhaled DHE: a randomized, controlled study in the acute treatment of migraine. *Headache*. 2011;51(4):507-517. Medline:21457235 doi:10.1111/j.1526-4610.2011.01869.x
25. Aurora SK, Rozen TD, Kori SH, Shrewsbury SB. A randomized, double blind, placebo-controlled study of MAP0004 in adult patients with migraine. *Headache*. 2009;49(6):826-837. Medline:19545249 doi:10.1111/j.1526-4610.2009.01453.x
26. Avcu N, Dogan NO, Pekdemir M, et al. Intranasal Lidocaine in Acute Treatment of Migraine: A Randomized Controlled Trial. *Ann Emerg Med*. 2017;69(6):743-751. Medline: 27889366 doi: 10.1016/j.annemergmed.2016.09.031
27. Banerjee M, Findley L. Propranolol in the treatment of acute migraine attacks. *Cephalalgia*. 1991;11(4):193-196. Medline: 1742775 doi: 10.1046/j.1468-2982.1991.1104193.x

28. Bell R, Montoya D, Shuaib A, Lee MA. A comparative trial of three agents in the treatment of acute migraine headache. *Ann Emerg Med.* 1990;19(10):1079-1082. Medline:2221511 doi:10.1016/S0196-0644(05)81507-14
29. Bigal ME, Bordini CA, Speciali JG. Intravenous chlorpromazine in the emergency department treatment of migraines: a randomized controlled trial. *J Emerg Med.* 2002;23(2):141-148. Medline:12359281 doi:10.1016/S0736-4679(02)00502-4
30. Bigal ME, Bordini CA, Tepper SJ, Speciali JG. Intravenous magnesium sulphate in the acute treatment of migraine without aura and migraine with aura. A randomized, double-blind, placebo-controlled study. *Cephalalgia.* 2002;22(5):345-353. Medline:12110110 doi: 10.1046/j.1468-2982.2002.00364.x
31. Blanda M, Rench T, Gerson LW, Weigand JV. Intranasal lidocaine for the treatment of migraine headache: a randomized, controlled trial. *Acad Emerg Med.* 2001;8(4):337-342. Medline:11282668 doi: 10.1111/j.1553-2712.2001.tb02111.x
32. Borhani Haghighi A, Motazedian S, Rezaii R, et al. Cutaneous application of menthol 10% solution as an abortive treatment of migraine without aura: a randomised, double-blind, placebo-controlled, crossed-over study. *Int J Clin Pract.* 2010;64(4):451-456. Medline:20456191 doi:10.1111/j.1742-1241.2009.02215.x
33. Boureau F, Joubert JM, Lasserre V, Prum B, Delecoeuillerie G. Double-blind comparison of an acetaminophen 400 mg-codeine 25 mg combination versus aspirin 1000 mg and placebo in acute migraine attack. *Cephalalgia.* 1994;14(2):156-161. Medline:8062355 doi:10.1046/j.1468-2982.1994.1402156.x
34. Brandes JL, Klise S, Krege JH, et al. Long-term safety and efficacy of lasmiditan for acute treatment of migraine: final results of the GLADIATOR study. *Cephalalgia Rep.* 2020;3. doi:10.1177/2515816320958176
35. Callahan M, Raskin N. A controlled study of dihydroergotamine in the treatment of acute migraine headache. *Headache.* 1986;26(4):168-171. Medline:3519528 doi:10.1111/j.1526-4610.1986.hed2604168.x
36. Cameron JD, Lane PL, Speechley M. Intravenous chlorpromazine vs intravenous metoclopramide in acute migraine headache. *Acad Emerg Med.* 1995;2(7):597-602. Medline:8521205 doi:10.1111/j.1553-2712.1995.tb03596.x
37. Carleton SC, Shesser RF, Pietrzak MP, et al. Double-blind, multicenter trial to compare the efficacy of intramuscular dihydroergotamine plus hydroxyzine versus intramuscular meperidine plus hydroxyzine for the emergency department treatment of acute migraine headache. *Ann Emerg Med.* 1998;32(2):129-138. Medline:9701293 doi:10.1016/S0196-0644(98)70126-X
38. Cete Y, Dora B, Ertan C, Ozdemir C, Oktay C. A randomized prospective placebo-controlled study of intravenous magnesium sulphate vs. metoclopramide in the management of acute migraine attacks in the emergency department. *Cephalalgia.* 2005;25(3):199-204. Medline:15689195 doi:10.1111/j.1468-2982.2004.00840.x
39. Chou DE, Shnayderman Yugrakh M, Winegarner D, Rowe V, Kuruvilla D, Schoenen J. Acute migraine therapy with external trigeminal neurostimulation (ACME): a randomized controlled trial. *Cephalalgia.* 2019;39(1):3-14. Medline:30449151 doi:10.1177/0333102418811573
40. Coppola M, Yealy DM, Leibold RA. Randomized, placebo-controlled evaluation of prochlorperazine versus metoclopramide for emergency department treatment of migraine headache. *Ann Emerg Med.* 1995;26(5):541-546. Medline:7486359 doi:10.1016/S0196-0644(95)70001-3

41. Corbo J, Esses D, Bijur PE, Iannaccone R, Gallagher EJ. Randomized clinical trial of intravenous magnesium sulfate as an adjunctive medication for emergency department treatment of migraine headache. *Ann Emerg Med.* 2001;38(6):621-627. Medline:11719739 doi:10.1067/mem.2001.119424
42. Croop R, Goadsby PJ, Stock DA, et al. Efficacy, safety, and tolerability of rimegepant orally disintegrating tablet for the acute treatment of migraine: a randomised, phase 3, double-blind, placebo-controlled trial. *Lancet.* 2019;394(10200):737-745. Medline:31311674 doi:10.1016/S0140-6736(19)31606-X
43. Demirkaya S, Vural O, Dora B, Topcuoglu MA. Efficacy of intravenous magnesium sulfate in the treatment of acute migraine attacks. *Headache.* 2001;41(2):171-177. Medline: 11251702 doi: 10.1046/j.1526-4610.2001.111006171.x
44. Derosier FJ, Sheftell F, Silberstein S, et al. Crossover study to evaluate the efficacy of a single fixed-dose tablet of sumatriptan and naproxen sodium (SumaRT/Nap) versus butalbital-containing combination medication (BCM) and placebo (PLA) for migraine headache. *Headache.* 2010;(1):9-10.
45. Dexter SL, Graham AN, Johnston ES. Double-blind controlled study of Paramax in the acute treatment of common and classical migraine. *British Journal of Clinical Practice.* 1985;39(10):388-392. Medline:3907680
46. Diamond S. Treatment of migraine with isometheptene, acetaminophen, and dichloralphenazone combination: a double blind, crossover trial. *Headache.* 1976;15(4):282-287. Medline: 6204485
47. Diener H-C, Jansen J-P, Reches A, et al. Efficacy, tolerability and safety of oral eletriptan and ergotamine plus caffeine (Cafergot) in the acute treatment of migraine: a multicentre, randomised, double-blind, placebo-controlled comparison. *Eur Neurol.* 2002;47(2):99-107. Medline:11844898 doi:10.1159/000047960
48. Dodick DW, Lipton RB, Ailani J, et al. Ubrogepant for the Treatment of Migraine. *N Engl J Med.* 2019;381(23):2230-2241. Medline:31800988 doi:10.1056/NEJMoa1813049
49. Dogan NO, Pekdemir M, Yilmaz S, et al. Intravenous metoclopramide in the treatment of acute migraines: a randomized, placebo-controlled trial. *Acta Neurol Scand.* 2019;139(4):334-339. Medline:30629285 doi:10.1111/ane.13063
50. Donaldson D, Sundermann R, Jackson R, Bastani A. Intravenous dexamethasone vs placebo as adjunctive therapy to reduce the recurrence rate of acute migraine headaches: a multicenter, double-blinded, placebo-controlled randomized clinical trial. *Am J Emerg Med.* 2008;26(2):124-130. Medline: 18272089 doi: 10.1016/j.ajem.2007.03.029
51. Etchison AR, Bos L, Ray M, et al. Low-dose Ketamine Does Not Improve Migraine in the Emergency Department: A Randomized Placebo-controlled Trial. *West J Emerg Med.* 2018;19(6):952-960. Medline: 30429927 doi: 10.5811/westjem.2018.8.37875
52. Farahmand S, Shafazand S, Alinia E, Bagheri-Hariri S, Baratloo A. Pain Management Using Acupuncture Method in Migraine Headache Patients; A Single Blinded Randomized Clinical Trial. *Anesth.* 2018;8(6):e81688. Medline:30666295 doi:10.5812/aapm.81688



53. Farkkila M, Diener H-C, Geraud G, et al. Efficacy and tolerability of lasmiditan, an oral 5-HT<sub>1F</sub> receptor agonist, for the acute treatment of migraine: a phase 2 randomised, placebo-controlled, parallel-group, dose-ranging study. *Lancet neurol.* 2012;11(5):405-413. Medline: 22459549 doi: 10.1016/S1474-4422(12)70047-9
54. Fernando T, Lumanauw DD, Youn S, et al. Buccally absorbed vs intravenous prochlorperazine for treatment of migraines headaches. *Acta Neurol Scand.* 2019;140(1):72-77. Medline:30993680 doi:10.1111/ane.13104
55. Ferrari MD, Farkkila M, Reuter U, et al. Acute treatment of migraine with the selective 5-HT<sub>1F</sub> receptor agonist lasmiditan:-a randomised proof-of-concept trial. *Cephalalgia.* 2010;30(10):1170-1178. Medline:20855362 doi:10.1177/0333102410375512
56. Foroughipour M, Ghandehari K, Khazaei M, Ahmadi F, Shariatinezhad K, Ghandehari K. Randomized clinical trial of intravenous valproate (orifil) and dexamethasone in patients with migraine disorder. *Iran.* 2013;38(2 Suppl):150-155. Medline: 24031104
57. Freitag FG. The acute treatment of migraine with transnasal butorphanol (TNB). *Headache Q.* 1993;4(suppl 3):22-28.
58. Friedman BW, Greenwald P, Bania TC, et al. Randomized trial of IV dexamethasone for acute migraine in the emergency department. *Neurology.* 2007;69(22):2038-2044. Medline: 17942818 doi: 10.1212/01.WNL.0000281105.78936.1d
59. Friedman AP, Di Serio FJ, Hwang DS. Symptomatic relief of migraine: multicenter comparison of Cafergot P-B, Cafergot, and placebo. *Clin Ther.* 1989;11(1):170-182. Medline:2497984
60. Friedman BW, Esses D, Solorzano C, et al. A randomized controlled trial of prochlorperazine versus metoclopramide for treatment of acute migraine. *Ann Emerg Med.* 2008;52(4):399-406. Medline:18006188 doi:10.1016/j.annemergmed.2007.09.027
61. Friedman BW, Mulvey L, Esses D, et al. Metoclopramide for acute migraine: a dose-finding randomized clinical trial. *Ann Emerg Med.* 2011;57(5):475-482.e471. Medline:21227540 doi:10.1016/j.annemergmed.2010.11.023
62. Friedman BW, Cabral L, Adewunmi V, et al. Diphenhydramine as Adjuvant Therapy for Acute Migraine: An Emergency Department-Based Randomized Clinical Trial. *Ann Emerg Med.* 2016;67(1):32-39.e33. Medline:26320523 doi:10.1016/j.annemergmed.2015.07.495
63. Friedman BW, Mohamed S, Robbins MS, et al. A Randomized, Sham-Controlled Trial of Bilateral Greater Occipital Nerve Blocks With Bupivacaine for Acute Migraine Patients Refractory to Standard Emergency Department Treatment With Metoclopramide. *Headache.* 2018;58(9):1427-1434. Medline: 30144034 doi: 10.1111/head.13395
64. Friedman BW, Irizarry E, Solorzano C, et al. Randomized study of IV prochlorperazine plus diphenhydramine vs IV hydromorphone for migraine. *Neurology.* 2017;89(20):2075-2082. Medline:29046364 doi:10.1212/WNL.0000000000004642
65. Friedman BW, Irizarry E, Williams A, et al. A Randomized, Double-Dummy, Emergency Department-Based Study of Greater Occipital Nerve Block With

- Bupivacaine vs Intravenous Metoclopramide for Treatment of Migraine. *Headache*. 2020;60(10):2380-2388. Medline: 32981043 doi: 10.1111/head.13961
66. Fuglsang CH, Johansen T, Kaila K, Kasch H, Bach FW. Treatment of acute migraine by a partial rebreathing device: a randomized controlled pilot study. *Cephalalgia*. 2018;38(10):1632-1643. Medline:30134739 doi:10.1177/0333102418797285
  67. Gaffigan ME, Bruner DI, Wason C, Pritchard A, Frumkin K. A randomized controlled trial of intravenous haloperidol vs. intravenous metoclopramide for acute migraine therapy in the emergency department. *J Emerg Med*. 2015;49(3):326-334. Medline:26048068 2 doi:10.1016/j.jemermed.2015.03.023
  68. Gallagher RM. Acute treatment of migraine with dihydroergotamine nasal spray. Dihydroergotamine Working Group. *Arch Neurol*. 1996;53(12):1285-1291. Medline:8970458 doi:10.1001/archneur.1996.00550120097022
  69. Gerhardt RT, Hermstad E, Crawford DM, Rayfield J, Pfaff J, Hunter CJ. Postdischarge secobarbital after ED migraine treatment decreases pain and improves resolution. *Am J Emerg Med*. 2011;29(1):86-90. Medline: 20825791 doi: 10.1016/j.ajem.2009.09.027
  70. Goadsby PJ, Wietecha LA, Dennehy EB, et al. Phase 3 randomized, placebo-controlled, double-blind study of lasmiditan for acute treatment of migraine. *Brain*. 2019;142(7):1894-1904. Medline:31132795 doi:10.1093/brain/awz134
  71. Hakkarainen H, Allonen H. Ergotamine vs metoclopramide vs. their combination in acute migraine attacks. *Headache*. 1982;22(1):10-12. Medline:17152739 doi:10.1111/j.1526-4610.1982.hed2201010.x
  72. Hoffert MJ, Scholz MJ, Kanter R. A double-blind controlled study of nifedipine as an abortive treatment in acute attacks of migraine with aura. *Cephalalgia*. 1992;12(5):323-324. Medline: 1423566 doi: 10.1046/j.1468-2982.1992.1205323.x
  73. Hoffert MJ, Couch JR, Diamond S, et al. Transnasal butorphanol in the treatment of acute migraine. *Headache*. 1995;35(2):65-69. Medline:7737863 doi:10.1111/j.1526-4610.1995.hed3502065.x
  74. Hokenek NM, Erdogan MO, Hokenek UD, Algin A, Tekyol D, Seyhan AU. Treatment of migraine attacks by transcutaneous electrical nerve stimulation in emergency department: a randomized controlled trial. *Am J Emerg Med*. 2021;39:80-852020;15:15. Medline:31983598 doi:10.1016/j.ajem.2020.01.024
  75. Honkaniemi J, Liimatainen S, Rainesalo S, Sulavuori S. Haloperidol in the acute treatment of migraine: a randomized, double-blind, placebo-controlled study. *Headache*. 2006;46(5):781-787. Medline:1664358 doi:10.1111/j.1526-4610.2006.00438.x
  76. Jones EB, Gonzalez ER, Boggs JG, Grillo JA, Elswick RK. Safety and efficacy of rectal prochlorperazine for the treatment of migraine in the emergency department. *Ann Emerg Med*. 1994;24(2):237-241. Medline:8037389 doi:10.1016/S0196-0644(94)70135-0
  77. Jones J, Pack S, Chun E. Intramuscular prochlorperazine versus metoclopramide as single-agent therapy for the treatment of acute migraine headache. *Am J Emerg Med*. 1996;14(3):262-264. Medline:8639197 doi:10.1016/S0735-6757(96)90171-0
  78. Jones CW, Remboski LB, Freeze B, Braz VA, Gaughan JP, McLean SA. Intravenous Fluid for the Treatment of Emergency Department Patients With

- Migraine Headache: A Randomized Controlled Trial. *Ann Emerg Med.* 2019;73(2):150-156. Medline: 30665504 doi: 10.1016/j.annemergmed.2018.09.004
79. Kandil M, Jaber S, Desai D, et al. MAGraine: Magnesium compared to conventional therapy for treatment of migraines. *Am J Emerg Med.* 2021;39:28-33. Medline:33041146 doi:10.1016/j.ajem.2020.09.033
  80. Kangasniemi P, Kaaja R. Ketoprofen and ergotamine in acute migraine. *J Intern Med.* 1992;231(5):551-554. Medline:1602293 doi:10.1111/j.1365-2796.1992.tb00973.x
  81. Kapicioglu S, Gokce E, Kapicioglu Z, Ovali E. Treatment of migraine attacks with a long-acting somatostatin analogue (octreotide, SMS 201-995). *Cephalalgia.* 1997;17(1):27-30. Medline: 9051332 doi: 10.1046/j.1468-2982.1997.1701027.x
  82. Karimi N, Tavakoli M, Charati JY, Shamsizade M. Single-dose intravenous sodium valproate (Depakine) versus dexamethasone for the treatment of acute migraine headache: a double-blind randomized clinical trial. *Clin.* 2017;4(3):138-145. Medline: 29026887 doi: 10.15441/ceem.16.199
  83. Klapper JA, Stanton J. Current emergency treatment of severe migraine headaches. *Headache.* 1993;33(10):560-562. Medline:8294195 doi:10.1111/j.1526-4610.1993.hed3310560.x
  84. Korucu O, Dagar S, Corbacioglu SK, Emektar E, Cevik Y. The effectiveness of greater occipital nerve blockade in treating acute migraine-related headaches in emergency departments. *Acta Neurol Scand.* 2018;138(3):212-218. Medline:29744871 doi:10.1111/ane.12952
  85. Kuca B, Silberstein SD, Wietecha L, Berg PH, Dozier G, Lipton RB. Lasmiditan is an effective acute treatment for migraine: A phase 3 randomized study. *Neurology.* 2018;91(24):e2222-e2232. Medline:30446595 doi:10.1212/WNL.0000000000006641
  86. Lane PL, McLellan BA, Baggoley CJ. Comparative efficacy of chlorpromazine and meperidine with dimenhydrinate in migraine headache. *Ann Emerg Med.* 1989;18(4):360-365. Medline:2705667 doi:10.1016/S0196-0644(89)80570-0
  87. Levy MJ, Matharu MS, Bholra R, Meeran K, Goadsby PJ. Octreotide is not effective in the acute treatment of migraine. *Cephalalgia.* 2005;25(1):48-55. Medline: 15606570 doi: 10.1111/j.1468-2982.2004.00807.x
  88. Li Y, Liang F, Yang X, et al. Acupuncture for treating acute attacks of migraine: a randomized controlled trial. *Headache.* 2009;49(6):805-816. Medline:19438740 doi:10.1111/j.1526-4610.2009.01424.x
  89. Lipton RB, Baggish JS, Stewart WF, Codispoti JR, Fu M. Efficacy and Safety of Acetaminophen in the Treatment of Migraine. *Archives of Internal Medicine.* 2000;160(22):3486. Medline: 11112243 doi: 10.1001/archinte.160.22.3486
  90. Lipton RB, Dodick DW, Silberstein SD, et al. Single-pulse transcranial magnetic stimulation for acute treatment of migraine with aura: a randomised, double-blind, parallel-group, sham-controlled trial. *Lancet neurol.* 2010;9(4):373-380. Medline:20206581 doi:10.1016/S1474-4422(10)70054-5
  91. Lipton RB, Croop R, Stock EG, et al. Rimegepant, an Oral Calcitonin Gene-Related Peptide Receptor Antagonist, for Migraine. *N Engl J Med.* 2019;381(2):142-149. Medline:31291516 doi:10.1056/NEJMoa1811090
  92. Lipton RB, Dodick DW, Ailani J, et al. Effect of Ubrogepant vs Placebo on Pain and the Most Bothersome Associated Symptom in the Acute Treatment of

- Migraine: The ACHIEVE II Randomized Clinical Trial. *Jama*. 2019;322(19):1887-1898. Medline:31742631 doi:10.1001/jama.2019.16711
93. Maizels M, Scott B, Cohen W, Chen W. Intranasal lidocaine for treatment of migraine: a randomized, double-blind, controlled trial. *Jama*. 1996;276(4):319-321. Medline: 8656545 doi:10.1001/jama.1996.03540040063034
  94. Maizels M, Geiger AM. Intranasal lidocaine for migraine: a randomized trial and open-label follow-up. *Headache*. 1999;39(8):543-551. Medline: 11279969 doi: 10.1046/j.1526-4610.1999.3908543.x
  95. Marcus SV. Phase 1 of integrated EMDR: an abortive treatment for migraine headaches. *J EMDR Pract and Res*. 2008;2(1):15-25. doi:10.1891/1933-3196.2.1.15
  96. Marcus R, Goadsby PJ, Dodick D, Stock D, Manos G, Fischer TZ. BMS-927711 for the acute treatment of migraine: a double-blind, randomized, placebo controlled, dose-ranging trial. *Cephalalgia*. 2014;34(2):114-125. Medline:23965396 doi:10.1177/0333102413500727
  97. Mazaheri S, Poorolajal J, Hosseinzadeh A, Fazlian MM. Effect of intravenous sodium valproate vs dexamethasone on acute migraine headache: a double blind randomized clinical trial. *PLoS ONE*. 2015;10(3):e0120229. Medline: 25793707 doi: 10.1371/journal.pone.0120229
  98. McEwen JI, O'Connor HM, Dinsdale HB. Treatment of migraine with intramuscular chlorpromazine. *Ann Emerg Med*. 1987;16(7):758-763. Medline:3592329 doi:10.1016/S0196-0644(87)80569-3
  99. Meek R, Graudins A, McDonald M, McGannon D, Limm E. Comparing propofol with placebo for early resolution of acute migraine in adult emergency department patients: A double-blind randomised controlled trial. *Emerg Med Australas*. 2020;17:17. Medline: 33070469 doi: 10.1111/1742-6723.13659
  100. Miller MA, Levsky ME, Enslow W, Rosin A. Randomized evaluation of octreotide vs prochlorperazine for ED treatment of migraine headache. *Am J Emerg Med*. 2009;27(2):160-164. Medline:19371522 doi:10.1016/j.ajem.2008.01.015
  101. Mitra B, Roman C, Mercier E, et al. Propofol for migraine in the emergency department: A pilot randomised controlled trial. *Emerg Med Australas*. 2020;32(4):542-547. Medline: 32705801 doi: 10.1111/1742-6723.13542
  102. Molaie M, Olson CM, Koch J. The effect of intravenous verapamil on acute migraine headache. *Headache*. 1987;27(1):51-53. Medline: 3549629 doi: 10.1111/j.1526-4610.1987.hed2701051.x
  103. Motamed H, Mozafari J, Porozan S, Sasani M. Magnesium sulfate and acute migraine: a randomized clinical trial. *Ann Clin Anal Med*. 2020;11(5):369-373.
  104. Niazi M, Hashempur MH, Taghizadeh M, Heydari M, Shariat A. Efficacy of topical rose (*Rosa damascena* Mill.) oil for migraine headache: a randomized double-blinded placebo-controlled cross-over trial. *Complement Ther Med*. 2017;34:35-41. Medline:28917373 doi:10.1016/j.ctim.2017.07.009
  105. Prior MJ, Codispoti JR, Fu M. A randomized, placebo-controlled trial of acetaminophen for treatment of migraine headache. *Headache*. 2010;50(5):819-833. Medline: 20236342 doi: 10.1111/j.1526-4610.2010.01638.x
  106. Rafieian-Kopaei M, Hasanpour-Dehkordi A, Lorigooini Z, Deris F, Solati K, Mahdiyeh F. Comparing the Effect of Intranasal Lidocaine 4% with Peppermint Essential Oil Drop 1.5% on Migraine Attacks: A Double-Blind Clinical Trial. *Int J Prev Med*. 2019;10:121. Medline: 31404204 doi: 10.4103/ijpvm.IJPVM\_530\_17

107. Rapoport A, Sheftell F, Couch J, et al. Efficacy, safety, and tolerability of dihydroergotamine nasal spray as monotherapy in the treatment of acute migraine. *Headache*. 1995;35(4):177-184. Medline:7775172 doi:10.1111/j.1526-4610.1995.hed3504177.x
108. Reutens DC, Fatovich DM, Stewart-Wynne EG, Prentice DA. Is intravenous lidocaine clinically effective in acute migraine? *Cephalalgia*. 1991;11(6):245-247. Medline: 1790567 doi: 10.1046/j.1468-2982.1991.1106245.x
109. Richman PB, Allegra J, Eskin B, et al. A randomized clinical trial to assess the efficacy of intramuscular droperidol for the treatment of acute migraine headache. *Am J Emerg Med*. 2002;20(1):39-42. Medline:11781912 doi:10.1053/ajem.2002.30007
110. Rowat BM, Merrill CF, Davis A, South V. A double-blind comparison of granisetron and placebo for the treatment of acute migraine in the emergency department. *Cephalalgia*. 1991;11(5):207-213. Medline:1663423 doi:10.1046/j.1468-2982.1991.1105207.x
111. Ryan RE. Double-blind clinical evaluation of the efficacy and safety of ergostine-caffeine, ergotamine-caffeine, and placebo in migraine headache. *Headache*. 1970;9(4):212-220. Medline:4904954 doi:10.1111/j.1526-4610.1970.hed0904212.x
112. Salazar G, Fragoso M, Vergez L, Sergio P, Cuello D. Metoclopramide as an analgesic in severe migraine attacks: an open, single-blind, parallel control study. *Recent Patents CNS Drug Discov*. 2011;6(2):141-145. Medline:21585330 doi:10.2174/157488911795933947
113. Scherl ER, Wilson JF. Comparison of dihydroergotamine with metoclopramide versus meperidine with promethazine in the treatment of acute migraine. *Headache*. 1995;35(5):256-259. Medline:7775186 doi:10.1111/j.1526-4610.1995.hed3505256.x
114. Shahrami A, Assarzagdegan F, Hatamabadi HR, Asgarzadeh M, Sarehbandi B, Asgarzadeh S. Comparison of therapeutic effects of magnesium sulfate vs. dexamethasone/metoclopramide on alleviating acute migraine headache. *J Emerg Med*. 2015;48(1):69-76. Medline:25278139 doi:10.1016/j.jemermed.2014.06.055
115. Sharma S, Prasad A, Nehru R, et al. Efficacy and tolerability of prochlorperazine buccal tablets in treatment of acute migraine. *Headache*. 2002;42(9):896-902. Medline:12390617 doi:10.1046/j.1526-4610.2002.02210.x
116. Silberstein SD, Freitag FG, Rozen TD, et al. Tramadol/acetaminophen for the treatment of acute migraine pain: findings of a randomized, placebo-controlled trial. *Headache*. 2005;45(10):1317-1327. Medline:16324164 doi:10.1111/j.1526-4610.2005.00264.x
117. Silberstein SD, Young WB, Mendizabal JE, Rothrock JF, Alam AS. Acute migraine treatment with droperidol: a randomized, double-blind, placebo-controlled trial. *Neurology*. 2003;60(2):315-321. Medline:12552051 doi:10.1212/01.WNL.0000042477.63516.B2
118. Soleimanpour H, Ghafouri RR, Taheraghdam A, et al. Effectiveness of intravenous dexamethasone versus propofol for pain relief in the migraine headache: a prospective double blind randomized clinical trial. *BMC Neurol*. 2012;12:114. Medline: 23020264 doi: 10.1186/1471-2377-12-114
119. Stiell IG, Dufour DG, Moher D, Yen M, Beilby WJ, Smith NA. Methotrimeprazine versus meperidine and dimenhydrinate in the treatment of severe migraine: a

- randomized, controlled trial. *Ann Emerg Med.* 1991;20(11):1201-1205. Medline:1952306 doi:10.1016/S0196-0644(05)81471-4
120. Taheraghdam AA, Amiri H, Shojaan H, Shamsvahdati S, Houshyar Y. Intravenous dexamethasone versus morphine in relieving of acute migraine headache. *Pak.* 2011;14(12):682-687. Medline:22303641 doi:10.3923/pjbs.2011.682.687
  121. Tanen DA, Miller S, French T, Riffenburgh RH. Intravenous sodium valproate versus prochlorperazine for the emergency department treatment of acute migraine headaches: a prospective, randomized, double-blind trial. *Ann Emerg Med.* 2003;41(6):847-853. Medline:12764341 doi:10.1067/mem.2003.195
  122. Tassorelli C, Grazi L, e Tommaso M, et al. Noninvasive vagus nerve stimulation as acute therapy for migraine: the randomized PRESTO study. *Neurology.* 2018;91(4):e364-e373. Medline:29907608 doi:10.1212/WNL.0000000000005857
  123. Tek DS, McClellan DS, Olshaker JS, Allen CL, Arthur DC. A prospective, double-blind study of metoclopramide hydrochloride for the control of migraine in the emergency department. *Ann Emerg Med.* 1990;19(10):1083-1087. Medline:2221512 doi:10.1016/S0196-0644(05)81508-2
  124. Treves TA, Kuritzky A, Hering R, Korczyn AD. Dihydroergotamine nasal spray in the treatment of acute migraine. *Headache.* 1998;38(8):614-617. Medline:11398305 doi:10.1046/j.1526-4610.1998.3808614.x
  125. Triner WR, Bartfield JM, Birdwell M, Raccio-Robak N. Nitrous oxide for the treatment of acute migraine headache. *Am J Emerg Med.* 1999;17(3):252-254. Medline:10337883 doi:10.1016/S0735-6757(99)90118-3
  126. Tulunay FC, Karan O, Aydin N, Culcuoglu A, Guvener A. Dihydroergotamine nasal spray during migraine attacks: a double-blind crossover study with placebo. *Cephalalgia.* 1987;7(2):131-133. Medline:3301001 doi:10.1046/j.1468-2982.1987.0702131.x
  127. Voss T, Lipton RB, Dodick DW, et al. A phase IIb randomized, double-blind, placebo-controlled trial of ubrogepant for the acute treatment of migraine. *Cephalalgia.* 2016;36(9):887-898. Medline:27269043 doi:10.1177/0333102416653233
  128. Wang L-P, Zhang X-Z, Guo J, et al. Efficacy of acupuncture for acute migraine attack: a multicenter single blinded, randomized controlled trial. *Pain Med.* 2012;13(5):623-630. Medline:22536889 doi:10.1111/j.1526-4637.2012.01376.x
  129. Yang J, Zeng F, Feng Y, et al. A PET-CT study on the specificity of acupoints through acupuncture treatment in migraine patients. *BMC Altern Med.* 2012;12:123. Medline:22894176 doi:10.1186/1472-6882-12-123
  130. Yarnitsky D, Volokh L, Ironi A, et al. Nonpainful remote electrical stimulation alleviates episodic migraine pain. *Neurology.* 2017;88(13):1250-1255. Medline:28251920 doi:10.1212/WNL.0000000000003760
  131. Yarnitsky D, Dodick DW, Grosberg BM, et al. Remote Electrical Neuromodulation (REN) Relieves Acute Migraine: A Randomized, Double-Blind, Placebo-Controlled, Multicenter Trial. *Headache.* 2019;59(8):1240-1252. Medline:31074005 doi:10.1111/head.13551
  132. Zargarani A, Borhani-Haghighi A, Salehi-Marzijarani M, et al. Evaluation of the effect of topical chamomile (*Matricaria chamomilla* L.) oleogel as pain relief in migraine without aura: a randomized, double-blind, placebo-controlled, crossover

- study. *Neurol Sci*. 2018;39(8):1345-1353. Medline:29808331 doi:10.1007/s10072-018-3415-1
133. Ziegler D, Ford R, Kriegler J, et al. Dihydroergotamine nasal spray for the acute treatment of migraine. *Neurology*. 1994;44(3 pt 1):447-453. Medline:8145914 doi:10.1212/WNL.44.3\_Part\_1.447
  134. Tepper SJ, Vasudeva R, Krege JH, et al. Evaluation of 2-Hour Post-Dose Efficacy of Lasmiditan for the Acute Treatment of Difficult-to-Treat Migraine Attacks. *Headache*. 2020;07:07. Medline: 32634275 doi: 10.1111/head.13897
